# Supplementary material for: A Phenomenological Study of Psychosocial Challenges faced by Parents of Children with Neurodevelopmental Disabilities: A Qualitative Study
Source: Research Square preprint supplement (doi:10.21203/rs.3.rs-8369502/v1), 2026-01-12
Supplement: Supplementary file 1 [file 32150f7149335d28ae8214d6.pdf]

# Audio file

[Parent 1 1.m4a](#)

## Transcript

00:00:01 Speaker 1

जी नमस्कार, मेरा नाम अनुज श्रीवास्तव है और मैं साइको सोशल चैलेंजेस इंटरव्यू स्केड्यूल के लिए आज दो पैरेंट्स से डेटा कलेक्ट करने आया हूँ जिनका नाम मदर का नाम।

00:00:13 Speaker 2

मेरा नाम जहीन खान है और मेरे बेटे का नाम मोहम्मद अली खान है।

00:00:17 Speaker 1

जी।

00:00:18 Speaker 1

और फादर एक दूसरे पैरेंट हैं उनका नाम।

00:00:21 Speaker 3

मेरा नाम आस मोहम्मद है, मेरा पुता है इसका नाम मोहम्मद जहाँ रही है।

00:00:26 Speaker 1

जी, मैं आप लोगों से जो डेटा कलेक्ट कर रहा हूँ, इसमें आपको कोई स्वतः आप लोग दे रहे हैं जानकारी इसमें आपको कोई प्रॉब्लम तो नहीं है? कोई इश्यू तो नहीं है?

00:00:33 Speaker 2

जी नहीं, कोई इश्यू नहीं।

00:00:35 Speaker 1

है जी अपनी।

00:00:35 Speaker 3

नहीं कोई।

00:00:36 Speaker 1

इश्यू जी जी जी धन्यवाद।

00:00:37 Speaker 1

सो मेरा पहला क्वेश्चन है, कुछ 30 क्वेश्चन है मेरा पहला क्वेश्चन आप लोगों के सामने ये है कि बच्चे को प्रतिदिन के काम या पढ़ाई पूरी कराने में आपको कौन कौन सी कठिनाइयों का सामना करना पड़ता है?

00:00:51 Speaker 2

पहली बात तो वो सुनता ही नहीं है। काम करने के लिए जबरदस्ती बिठाना पड़ता है उसको स्कूल के काम के लिए।

00:00:57 Speaker 2

और फिर बैठकर उसके साथ में करवाना पड़ता है वो खुद से नहीं कर पाता है।

00:01:00 Speaker 1

ठीक है।

00:01:01 Speaker 3

जी वो भी मेरा जो बच्चा है वो सुनता है लेकिन काम कर नहीं पाता है, दौड़ता है, भागता है, चिल्लाता है।

00:01:10 Speaker 1

अच्छा।

00:01:10 Speaker 3

हाँ, जबरदस्ती उसको बैठाया जाता है पढ़ने के लिए पढ़ता है भागता है, वो \*\*\*\*\* नहीं रहता है।

00:01:16 Speaker 3

दौड़ते रहता है। हालांकि वो सुनता है लेकिन बोल नहीं पाता है। हाँ बोलता नहीं है वो।

00:01:21 Speaker 1

ठीक है, दूसरा सवाल है जब आप अपने बच्चे की क्षमता के अनुसार लक्ष्य तय करते हैं तो आपको कौन सी कठिनाइयों का सामना करना पड़ता है?

00:01:31 Speaker 2

अभी तो उसके लिए कुछ सोचा नहीं है। बस यही है कि वो नॉर्मल बच्चों की तरह रहे।

00:01:36 Speaker 2

जी।

00:01:37 Speaker 3

जी। वही आलम हम पहले नहीं सोचे थे की बाद में मेरे को उसका लक्षण मालूम हुआ की इसका ऐसे आये तो हम लोग डॉक्टर से मिले। मिलने के बाद में उसको यहाँ हम अडमिशन कराये जामिया में आना यहाँ उसका स्कूल में पढ़ाई पढ़ रहा है जी।

00:01:53 Speaker 1

अच्छा तीसरा प्रश्न है।

00:01:55 Speaker 1

अपने बच्चों को संरक्षित गतिविधियों सिखाने में जैसे संरक्षित गतिविधियों क्या होती हैं जैसे चित्रकारी पढ़ना लिखना है, ना जो काम करवाना ड्राइंग करवाना हो है ना में शामिल करने में आपको कौन कौन सी कठिनाइयों का सामना करना पड़ता है?

00:02:09 Speaker 2

एक काम करने में तो कोई प्रॉब्लम नहीं आती, वो कर लेता है, बस उसको बिठाना पड़ता है। जबरदस्ती सर जी?

00:02:15 Speaker 3

जी वो अब कर लेता है, हम बताएंगे ये करो जो भी रंग कोई भी कलर मिलाना है ले जाना है तो सब कर लेगा बैठो बैठ जायेगा खाना लेकिन मेरे को कहने के बाद वो अपने से नहीं कर पायेगा।

00:02:28 Speaker 1

चौथा प्रश्न है।

00:02:29 Speaker 1

अपने बच्चे के प्रयास को सराहना करने में आपको कौन सी कौन सी कठिनाइयों का सामना करना पड़ता है, है ना? जैसे बच्चे ने कुछ काम कर दिया, कोई अच्छा काम किया राइट, आपने उसको प्रेज़ किया, उसको शाबाशी दी। उसमें भी कई बार कठिनाइयां होती होगी की बच्चा समझ पा रहा है की नहीं समझ आप क्या कहना चाहते हैं? ऐसा कुछ है आप?

00:02:45 Speaker 2

नहीं ऐसा कुछ नहीं है, सब समझता है वो।

00:02:47 Speaker 1

अच्छा समझता है।

00:02:48 Speaker 3

जी जी हमारा बच्चा भी समझता है। हाँ बोलते हैं, वेरी गुड वेरी गुड जो काम करता है अच्छा है उसको हम बोलते हैं वो के वो भी ओके हाथ मिलाता है, इतना उसको समझदारी है।

00:02:58 Speaker 1

ठीक है, ठीक है, अगला प्रश्न है पांचवा प्रश्न अपने बच्चों को अलग अलग तरीकों से, जैसे कि बोल कर चित्रों से।

00:03:07 Speaker 1

हाथों से आंघी से अपनी योग्यता दिखाने में क्या क्या कठिनाई का सामना करना पड़ता है?

### 00:03:14 Speaker 2

नहीं, मेरे बच्चे का मैण्ड वैसे तो ठीक है बस उसको थोड़ी बोलने बोलने में ही दिक्कत आती है। वो क्लियर नहीं बोल पाता है। जी।

### 00:03:20 Speaker 1

क्लियर नहीं बोल पाते।

### 00:03:21 Speaker 2

बस और कोई दिक्कत नहीं, बाकी मैण्ड से सब ठीक है, उसको कोई दिक्कत नहीं होती। करवाने में कुछ भी या पता नहीं।

### 00:03:27 Speaker 3

जी जी वही मेरा बच्चा का ब्रेन सही है, अकल भी है सब लेकिन बोल नहीं पता है वो कौन है, कौन सारे वो काम करेगा और अपने से नहीं कर पाएगा। खाना लेके जाएंगे, खिलाएंगे तो खाएगा।

### 00:03:39 Speaker 1

अच्छा छठवा प्रश्न है अपने बच्चों को दोस्त बनाने या दोस्ती बनाए रखने में आपको कौन कौन सी कठिनाइयां का सामना करना पड़ता है?

### 00:03:47 Speaker 2

नहीं, उसमें भी कोई प्रॉब्लम नहीं आई। उसने अपने फ्रेंड्स खुद से ही बनाए हैं और काफी फ्रेंड्स भी हैं और उनके साथ वो खेलता भी है।

### 00:03:53 Speaker 1

जी।

### 00:03:54 Speaker 3

जी वो बस मेरा वो बच्चों के साथ खेल लेता है ऐसा बदले की नहीं? जी हाँ हाँ वो बनाया है, वो खेलता है ऐसा कोई प्रॉब्लम नहीं है।

### 00:04:02 Speaker 1

ठीक है, सातवाँ प्रश्न है अपने बच्चों को सामाजिक कौशल?

### 00:04:06 Speaker 1

यानी जो सोशल स्किल्स है उठना, बैठना, खाना खाना नहीं गिराना राइट सामाजिक कौशल जैसे बंटवारे, बात कर लेना, बाहरी लेना, अपनी टर्न का इंतजार करना, सहयोग करना, एक दूसरे के पास हेल्प करना मैं आपको सिखाने में ये सब सिखाने में आपको कौन कौन सी कठिनाइयों का सामना करना पड़ता है?

### 00:04:26 Speaker 2

जब वो छोटा था तब शुरू शुरू में उसको ये सब चीज़ें बताई थी सिखाई थी और अब वो इन सब में परफेक्ट है। सब अच्छे से करता है जी।

### 00:04:33 Speaker 3

जी जी बात सही है छोटा में तो हम भी उसको सिखाया पढ़ाया सब कुछ किये लेकिन अब थोड़ा उसको आ गया है की ये काम हमको करना है ये करना है ये जाना है ये खाना है वो सब खा लेता।

00:04:45 Speaker 1

है।

00:04:46 Speaker 1

और बाहर भी अगर कहीं लेके जाएं, कहीं किसी के है ना लंच वगैरह में या हाँ, मान लीजिए तो वहाँ पे भी सही से रहते हैं।

00:04:53 Speaker 2

जी।

00:04:54 Speaker 1

हाँ, हाँ, वहाँ पे भी सही से खाते हैं, कुछ शोर वगैरह नहीं, कुछ पैसा तो नहीं?

00:04:58 Speaker 2

बल्कि तो और भी कमी से।

00:04:59 Speaker 3

खाते हैं? अच्छा मैं कभी कभी भागता होता।

00:05:02 Speaker 1

है।

00:05:02 Speaker 1

अच्छा भागते हो, हाँ, वही सब जानना चाह रहे हैं मेरे को वही सब जब।

00:05:05 Speaker 3

समाधि मिल गया है। कोई फंक्शन मिल गया है तो थोड़ा 80 रहेगा, क्योंकि थोड़ा भाग दौड़ता रहेगा। ये सबा

00:05:11 Speaker 1

अच्छा।

00:05:12 Speaker 3

ठीक है, लेकिन भाग दौड़ता रहेगा।

00:05:13 Speaker 1

अच्छा और खाना गिराते तो नहीं है।

00:05:15 Speaker 3

जी हम गिराते हैं।

00:05:16 Speaker 1

नहीं गिराते खाता खाते हो गिराते तो नहीं है जी ना अच्छा अच्छा ठीक है।

00:05:20 Speaker 3

अगर नहीं खाना है तो।

00:05:22 Speaker 3

ठीका

00:05:23 Speaker 1

है ठीक है, आत्मा प्रश्न है जब आपका बच्चा समूह गतिविधियों में यानी ग्रुप में खेल रहा हो भाग ले रहा हूँ, तो आपको कोई कठिनाई का सामना करना पड़ता है।

00:05:33 Speaker 2

नहीं। ऐसे तो कोई दिक्कत नहीं आती।

00:05:35 Speaker 1

अच्छा।

00:05:35 Speaker 3

जी जी हम को तो चाहते हैं की वो अपने संगत में अपने हमजोली के साथ खेले कूदे। हम तो चाहते हैं।

00:05:41 Speaker 3

लेकिन हाँ हमको कोई प्रॉब्लम नहीं है, लेकिन वो करता है अपने दोस्तों के साथ खेलने के लिए।

00:05:47 Speaker 1

और कोई मजाक वगैरह तो नहीं? कहीं कोई सियासत तो नहीं क्योंकि इनका मजाक उड़ा रहा हूँ कुछ ऐसा कर रहा हूँ कुछ भी नहीं, कुछ भी नहीं ठीक है। अगला नौवां प्रश्न है अपने बच्चों को दूसरों के साथ सहयोग का महत्व समझाने में।

00:05:59 Speaker 1

आपको कौन कौन सी कठिनाइयों का सामना करना पड़ता है सहयोग का सहयोग समझ जाना की एक दूसरे के साथ मिलकर रहना है साथ में रहना है राइट ऐसा में कोई समस्याओं का सामना करना पड़ता हो।

00:06:09 Speaker 2

नहीं बल्कि वो तो खुद दूसरों के साथ अच्छे से रहता है और हम बल्कि मना करते हैं की साथ मतलब इतना मत रहो की मतलब कोई तुमको मारे या कुछ कहे।

00:06:18 Speaker 2

लेकिन मैं मानता नहीं उसको मतलब सबसे इतनी प्यार मोहब्बत है कि सबके साथ में ही रहता है।

00:06:22 Speaker 1

अच्छा।

00:06:22 Speaker 3

जी जी, वो बच्चा मेरे साथ मेरे को रहता है लेकिन उसको कोई मरता नहीं है। हम चाहते हैं कि दोस्तों बच्चों के साथ खेले ताकि उसको दिमाग घूम जाए।

00:06:30 Speaker 1

ठीक है। अगला दसवां क्वेश्चन है हमारा जब आपका बच्चा साथियों के द्वारा अस्वीकृति।

00:06:36 Speaker 1

या उसको कोई कुछ तो बच्चे ऐसे होते होंगे जो उसको नहीं स्वीकृत कर रहे हैं? नहीं मानते उसको की भाई हमारे साथ मत आओ करके या गलतफहमी का कोई सामना कर रहा हो बेचारा बच्चा तो उस उस टाइम पे आपको जो सहयोग देना हो, उस टाइम पे कोई कठिनाई आती है। आप लोगों को कैसे रहता हो?

00:06:49 Speaker 2

नहीं अगर कोई बच्चे उसको बोलता है की नहीं हमारे साथ नहीं खेलना तो हम खुद मना कर देते हैं की नहीं नहीं मना कर रहे हैं तो मत खेलो।

00:06:55 Speaker 1

बच्चा समझ जी?

00:06:56 Speaker 2

हाँ, वो समझ जी हाँ नहीं समझता है वो मन कर देते तो मान जाता।

00:07:00 Speaker 3

है। जी जी वो मेरा बच्चा है, लोग भी उसको प्यार मोहब्बत देता है लेकिन हम उसको फिर ही छोड़ते हैं की थोड़े आदमी से बात कर रहे हो प्यार मोहब्बत लोग देते हैं उसको उसमें हमको कोई प्रॉब्लम नहीं है। अच्छा हाँ।

00:07:13 Speaker 1

अगला है ये?

00:07:15 Speaker 1

आपका क्वेश्चन है आपके बच्चों को पढ़ाई या गतिविधियों को प्रेरित करने के लिए उसको मोटीवेट करने के लिए की पढ़ाई करो। खुद से पढ़ाई करो राइट वो उसमें आपको कौनकौन सी कठिनाइयों का सामना करना पड़ता है?

00:07:25 Speaker 2

हाँ, उसके लिए तो बहुत परेशान करता है, पढ़ता नहीं है बैठकर जबरदस्ती उसके पापा से ये शिकायत करनी पड़ती है कि ये पढ़ाई नहीं कर रहा है तो वो डांटता है तो बैठता है लेकर।

**00:07:34 Speaker 2**

वरना मेरी नहीं सुनता, वो सिर्फ मैं पापा की सुनता।

**00:07:37 Speaker 3**

हूँ वो ही सही है, वो अपने से नहीं पड़ेगा कुर्सी पर उसको पढ़ाएंगे तो पड़ेगा नहीं तो भाग जाएगा।

**00:07:44 Speaker 1**

अच्छा बारवां प्रश्न है अपने बच्चों की आलोचना करने करने से बचते हुए केवल उसकी प्रगति पर ध्यान देने में आपको कोई समस्या का सामना करना पड़ता हो।

**00:07:54 Speaker 1**

कभी आलोचना की है आपने बच्चों की?

**00:07:56 Speaker 2**

जी नहीं।

**00:07:58 Speaker 1**

कभी भी नहीं।

**00:07:58 Speaker 2**

जी नहीं।

**00:08:00 Speaker 3**

कभी।

**00:08:00 Speaker 1**

हाँ कभी डांटना, कभी वैसे करना की तुम ये नहीं कर पा रहे क्यों नहीं कर पा रहे?

**00:08:04 Speaker 3**

हाँ जी, हम तो उसको समझाते हैं, डांटते हैं।

**00:08:06 Speaker 1**

जी।

**00:08:06 Speaker 3**

की तुम ऐसे करो, कोई गलती करता है, तो डांटते मत करो, तुम मान जाता है।



00:08:11 Speaker 1

ठीक है, ठीक है।

00:08:13 Speaker 1

उसके बाद तेरहवां प्रश्न है अपने बच्चों की छोटी छोटी सफलता को छोटा छोटा जो काम कर लेता है और बार बार सकारात्मक प्रोत्साहन देने में आपको कोई कठिनाई का सामना करना पड़ता हो।

00:08:25 Speaker 2

जी नहीं, ऐसी कोई बात नहीं मतलब काम करते हैं तो हम शाबाशी ही देते हैं क्योंकि बहुत अच्छा किया है पता है ऐसे करना चाहिए।

00:08:31 Speaker 2

बाकी और सब ठीक है।

00:08:32 Speaker 1

समझ जाता है जी।

00:08:33 Speaker 2

हाँ।

00:08:33 Speaker 1

बिल्कुल ओके क्वेश्चन नंबर 14 है अपने बच्चों को असफलता के बाद भी नए कार्य करने देने में आपको कौन सी कठिनाइयों का सामना करना पड़ता है? कई बार बच्चे नहीं कर पाते। कोई काम है ना? समझ लीजिए आपने कुछ मंगाया की किचन से ले आओ और वो।

00:08:49 Speaker 1

टूट गया या कोई चीज भी है जो आपने करने को दी बट वो नहीं कर पा रहा है उसके बाद भी नए काम आप उसको ऑफर करने में डरते हैं। कैसे होता है? कैसे आप उसको मोटीवेट करते हैं? क्या करते हैं? क्या प्रॉब्लम आती है आप लोगों को?

00:09:00 Speaker 2

नहीं सर काम ऐसे नहीं कर पाता, ये कोई सामान गिर जाता है तो डांटते तो हैं हम, लेकिन फिर भी बोलते हैं चल नहीं हो, कोई बात नहीं चल दुबारा जाओ और लेकर आओ।

00:09:08 Speaker 2

कर लोगे तुम?

00:09:08 Speaker 3

जी जी जी कोई गलती भी कर देता है तो उसको हमको कोई ऐतराज नहीं है। उसको हम चांस स्पीड देते हैं, फिट कर लो, मेरा और चांस कर लो।

00:09:17 Speaker 1

ठीक है, फिर उसके बाद क्रेश्चन नंबर 15 है। सॉरी सॉरी सॉरी क्रेश्चन नंबर 15 है अपने बच्चों के लिए।

00:09:27 Speaker 1

धैर्य और सकारात्मक का उदाहरण बनने में आपको कौन कौन सी कठिनाइयों का सामना करना पड़ता है? कई बार ऐसा होता है कि पेरेंट्स का पेशेस लूज हो जाता है, खासकर स्पेशल बच्चों के पेरेंट्स का लूज हो जाता है। बहुत ज्यादा जल्दी गुस्सा आ जाता है फिर तो उस टाइम पे फिर किस तरीके से आप सकारात्मक होने के लिए आप क्या करते हैं?

00:09:43 Speaker 2

उसमें बस थोड़ा डांटते हैं। उसको थोड़ा अपना मैण्ड भी ऑफ होता है। फिर थोड़ी देर के लिए फिर सोचते हैं की इसमें इसकी कोई गलती नहीं है, उसकी कोई गलती नहीं है। फिर उसके बाद हम फिर ही देखते हैं। उसको चलो कोई बात नहीं जो भी है।

00:09:55 Speaker 1

इसमें कितना टाइम लग जाता है और कैसे आप उसको अपने आप को सकारात्मक करते हैं?

00:09:59 Speaker 2

बस थोड़ी देर का ही होता है फिर।

00:10:01 Speaker 2

दिमाग होता है की मतलब हाँ, हमारे बच्चे ने थोड़ी दिक्कत है तो हमें ही संभालना है। इसको इसको डांटने से भी हमें कोई फायदा नहीं है।

00:10:08 Speaker 1

ठीक है तो उस टाइम पे आप कुछ मतलब ऐसा सकारात्मक चीज़ वगैरह कुछ करते हैं, कुछ अलग से।

00:10:12 Speaker 2

नहीं नहीं, कुछ नहीं करते, बस थोड़ा शांत होकर बैठ जाते हैं और सोचते हैं उस बारे में के उसमें कुछ भी दिक्कत नहीं है। दिक्कत ऊपर से ही है।

00:10:19 Speaker 2

तो जो भी होगा अल्लाह करेगा, जो अच्छा ही होगा, सब ठीक ही होंगे।

00:10:22 Speaker 3

जी जी, वही हाल है। हाँ हाँ।

00:10:24 Speaker 1

जी।

00:10:24 Speaker 3

बहुत परेशानी होता है, लेकिन समझदारी है कि बच्चों लोग वही अल्लाह ने उसको से किया है तो हम लोगों को थोड़ा बर्दाश्त करना पड़ता है। हाँ हाँ।

00:10:32 Speaker 1

ठीक है, सोलहवां क्वेश्चन जो है अपने बच्चों को उनकी भावनाओं सिखाने में।

**00:10:38 Speaker 1**

भावनाओं पहचानना दुखी है, खुश है, है ना या फिर कुछ और है? ना है, ना है उसको अलग से बेहेवियर हो रहा है सो उस टाइम पे आपको क्या क्या समस्याएं आती है जो समझाना होता है बच्चों के लिए बेहेवियर चीज ऐसी होती है बहुत डिफिकल्ट होता है पढ़ाना उस टाइम पे आपको क्या क्या समस्याएं हैं?

**00:10:55 Speaker 2**

नहीं अक्ववली उसको ना गुस्सा ज्यादा आता है, कोई काम नहीं होता है उसे तो गुस्सा उसको जल्दी आ जाता।

**00:11:00 Speaker 1**

है तो।

**00:11:02 Speaker 2**

तो उसको हमें डांटना पड़ता है क्योंकि प्यार से कोई समझता नहीं है। वो डांट से ही समझता है, अगर ज्यादा रोता है, कोई काम बिगड़ गया तो रोने लग गया। किसी ने कुछ बोल दिया तो रोने बैठ जाएगा।

**00:11:12 Speaker 2**

तब उसको हम डांटते हैं कि क्यों रो रहा है? बोल दिया तो कोई बात नहीं, ठीक से करो इस काम को।

**00:11:19 Speaker 1**

डांटना।

**00:11:19 Speaker 3**

ही पड़ता है।

**00:11:21 Speaker 1**

डांटना ही।

**00:11:21 Speaker 3**

पड़ता है, फिर उसको चांस दिया जाता है। डांटने के बाद चांस दिया जाता है। ठीक है।

**00:11:28 Speaker 1**

सत्रवां प्रश्न है अपने बच्चों को अपनी भावनाओं?

**00:11:32 Speaker 1**

सबसे सही तरीके से व्यक्त करने के लिए प्रोत्साहित करने में आपको कौन कौन सी कठिनाइयों का सामना करना पड़ता है? जैसे इसको मोटीवेट करना की भाई अपने एक्सप्लेन को सीधे सीधे अच्छे से बताओ कोई बात नहीं, क्योंकि आप भी आपने बताया जैसे आप दोनों ने बताया की आपको गुस्सा आता है राइट फिर उसको किस तरीके से आप मोटीवेट करते हैं? बच्चों को की भाई अपना बिहेवियर को ठीक से करो और अच्छे से बताओ।

00:11:52 Speaker 2

वही वही बात है डाट का ही समझाना पड़ता है। उसको जो भी कहना है ठीक से बोलो अभी समझ में नहीं आ रहा हमें तुम बोल क्या रहे हो, क्लियर बोलो जो हमें समझ आया और दुसरो को भी समझा जी हाँ।

00:12:03 Speaker 1

थोड़ा।

00:12:04 Speaker 2

थोड़ा सा गुस्सा आ जाता है। जब कोई एक चीज़ है वो बार बार कह रहा है और हमें समझ नहीं आ रहा है जब हमें समझ नहीं आ रहा है तो सामने वाले को भी समझ नहीं आया उन लोगों को।

00:12:12 Speaker 2

जी।

00:12:12 Speaker 1

हम।

00:12:13 Speaker 3

भी। जी हाँ, वही हाल है। हाँ तो आदमी इसीलिए अच्छा है हाँ रात को नहीं सोचा है तो आदमी परेशान हो जाता है, फिर उसको डांट डूँढ़ के सोया जाता है, बदमाशी करता है, उसके पास दिमाग तो है नहीं।

00:12:24 Speaker 1

रात में सोने में दिक्कत होती होगी, परेशानी होती होगी क्योंकि भाई आप उस टाइम पे आपको?

00:12:30 Speaker 1

मोटीवेट करना है तो आपको भी फ्रस्ट्रेशन आ रहा होगा। हाँ तो फिर कैसे वो मोटीवेट कर पाएंगे। है ना तकलीफ तो?

00:12:36 Speaker 3

होती है, टाइम दिया जाता है, समझा जाता है उसको ऐसे ऐसे सुनाया जाता है।

00:12:41 Speaker 1

जी अट्ठारहवा प्रश्न है जब बच्चा हीन भावना या दुखी हो रहा हो, सैड हो रहा हो या कोई चिंता में हो? ठीक है?

00:12:49 Speaker 1

अनुभव करता है तब आपको उसको समझाने में कुछ चिंता से बाहर आओ क्योंकि इमीडियेट तो बच्चे नहीं आ जाएंगे, आप बोलोगे और बच्चे बाहर आ जाएंगे। ऐसा तो नहीं होता कोई भी इंसान नहीं हो पाता है तो उस टाइम पे आपको कैसे क्या क्या कठिनाइयों का सामना करना पड़ता है? कितना टाइम लगता है मतलब?

00:13:02 Speaker 2

जब उसको कोई टेंशन होती है ना तो उसकी एक प्रॉब्लम है, उसको टेंशन होती है, सर में दर्द होने लगता है और उसको बुखार आ जाता है।

00:13:08 Speaker 1

अरे, बाप?

00:13:08 Speaker 2

जी हाँ।

00:13:09 Speaker 2

वो मतलब कोई भी चीज़ ना उसको हम दिल से उसको परेशान नहीं होने देते हैं। अगर किसी भी छोटी सी भी चीज़ की टेंशन ले लेगा तो उसको सर में दर्द होगा। उल्टी आने लगेगी तो उस।

00:13:19 Speaker 1

टाइम।

00:13:20 Speaker 2

पर बस उसकी केयर करनी पड़ती है हमें।

00:13:22 Speaker 1

और फिर दवाईया देनी।

00:13:23 Speaker 2

पड़ती है, दवाई वगैरह देनी पड़ती है, उसके बाद थोड़ा ठीक होता है।

00:13:27 Speaker 1

कौंसेलिंग वगैरह या कुछ बोलने से कुछ ऐसा कुछ असर हो पाता है?

00:13:30 Speaker 2

नहीं नहीं वो उस टाइम तो बस उसकी हालत ही खराब हो जाती है। अच्छा जी।

00:13:33 Speaker 1

आपा

00:13:34 Speaker 3

हाँ जी वो तो आता है जब टेंशन में है ना तो उसका मतलब पांव वो हाथ दबाते हैं

00:13:38 Speaker 1

अच्छा

00:13:38 Speaker 3

मतलब थोड़ा 10 5 मिनट 10 मिनट दबाने के बाद फिर अच्छा

00:13:41 Speaker 1

अच्छा औरा

00:13:42 Speaker 3

कोई दवा देने की जरूरत नहीं है।

00:13:44 Speaker 1

अच्छा अच्छा अच्छा

00:13:45 Speaker 1

उन्नीसवां प्रश्न है अपने बच्चों की बच्चों को सामना करने की रणनीतियां जैसे कई बार होता है ना जैसे अभी परेशान हो गया बट उसको ये सब चीज़े तो लाइफ में होती रहती है तो कैसे सामना करना है उसका? है ना कल को फिर ऐसी समस्या होगी, हम लोग नहीं होंगे, है ना? हम तो सारे अगेन नहीं है तो फिर आगे पीछे रहते ही है राइट।

00:14:04 Speaker 1

तब उसमें कैसे उसका सामना करना है? वो मुसीबतों का कैसे सामना करना है? वो सब चीज़े सिखाने के लिए जिसमें क्या होता है? हमारे बहुत सारे स्ट्रेटेजीज होती है वो जो मैं अभी आप मॉड्यूल बनाऊंगा वो इसी मॉड्यूल पे बनाऊंगा की आप लोगों को कैसे फ्रस्ट्रेशन हो रही है और उसका सलूशन कैसे हो सकता है तो उसमें कुछ कुछ एग्जैम्पल मैं आपको दे देता हूँ जैसे बच्चों को सीखाना, गहरी साँसे लेना।

00:14:23 Speaker 1

जब हमें भी कभी समस्याएं आती है तो हम लोगों को बैठकर लंबी लंबी गहरी सांसें ली जाती है, जिससे वो टेंशन रिलीज होता है।

00:14:30 Speaker 1

हमारा राइट और फिर बाते करना जितना अगर आप उस टाइम पे बाते करोगे एक्सप्रेसिव करोगे उतना ज्यादा आपकी टेंशन जो है धीरे धीरे कम होना स्टार्ट हो जाएगी। ऐसे बहुत सारी रणनीतियां है जो की मेरे को मॉड्यूल में डालनी होगी। सो वो सब चीज़ सिखाने में आपको कभी कठिनाइयों का सामना करना पड़ता हो क्योंकि आपने अभी तक बताया की उसको सिर्फ दवाईया देते है हम लोग? जी हाँ, तो फिर ऐसा तो आपने अभी तक।

00:14:49 Speaker 1

आई थिक नहीं किया होगा। कुछ ऐसा नहीं नहीं अभी तक तो नहीं किया है ना? आपने मुझे ध्यान नहीं रखा। ऐसा कुछ नहीं जब आपका बच्चा निराश होता है। कभी निराश हो गया तब उसकी भावनाओं को मान्यता देने में कि चलो ठीक है, आप निराश हैं, दुखी हैं, कोई बात नहीं एक्सेप्ट करते हैं इसको।

**00:15:06 Speaker 1**

ठीक है, उसमें आपको क्या क्या कठिनाई सामना करना पड़ता है क्योंकि अकेला छोड़ देंगे तो भी दिक्कत है नहीं।

**00:15:10 Speaker 2**

नहीं अकेला तो नहीं छोड़ सकते जी।

**00:15:12 Speaker 1**

हाँ, बिलकुल, बिलकुल, ठीक।

**00:15:14 Speaker 2**

कहता है या किसी किसी की टेंशन होती है जिस चीज़ की उसको हम पूरा करने की कोशिश करते हैं की किस वजह से परेशान हो क्या बात है वो बताओ फिर देखते हैं इसको क्या करना है।

**00:15:23 Speaker 1**

ठीक है और उसका।

**00:15:24 Speaker 1**

सैड होना कई कई सारी बात पे वैलिड है कि नहीं है, सही है कि नहीं है?

**00:15:28 Speaker 2**

नहीं सही होता है। जब भी वो दुखी होता है वरना हमारे इस सब को कभी दुखी नहीं होता, है ना सब कुछ रहता है।

**00:15:32 Speaker 1**

अच्छा उस टाइम पे आप कैसे सपोर्ट करते हैं बच्चों को?

**00:15:35 Speaker 3**

जी वो सही जैसा वो मान जाए।

**00:15:37 Speaker 1**

अच्छा।

**00:15:38 Speaker 3**

खाने के लिए।

**00:15:39 Speaker 1**

अच्छा कुछ खाने के लिए।

**00:15:41 Speaker 3**

किचन लेके जाएगा।

00:15:42 Speaker 1

अच्छा

00:15:42 Speaker 3

बिल भी आ जाएगा, सेम वगैरह अच्छा

00:15:45 Speaker 1

अच्छा इक्कीसवां प्रश्न है अपने बच्चों को सकारात्मक आत्म छवि बनाने में कौन सी कठिनाइयों का सामना करना पड़ता है? सकारात्मक आत्म छवि मतलब पॉजिटिव लाइफ की तरफ जीना है ना कॉन्फिडेंट होकर जीना की वो खुद ही स्कूल आ सकता है।

00:16:01 Speaker 1

खुद ही जा सकता है, है ना तो ये सब चीजें सिखाने में आपको कौन कौन सी कठिनाइयों का सामना करना?

00:16:06 Speaker 2

शुरू शुरू में जैसे हम ही जैसे स्कूल में पढ़ता है वो सेकंड क्लास में है तो मुझे लेके जाती थी लेकिन उसके बाद से फिर उसने खुद जाना शुरू कर दिया है। अच्छा अपने अकेले से लेकर छोटी बहन है, उसको भी साथ में लेकर जाते हैं।

00:16:18 Speaker 1

लेकिन आप उनको लेकर आते?

00:16:20 Speaker 2

नहीं।

00:16:20 Speaker 2

वहाँ वहीं फरीदाबाद में वहाँ पर अडमिशन करवाया था उसका।

00:16:24 Speaker 1

अच्छा जैसा

00:16:24 Speaker 2

नॉर्मल स्कूल में तो वहाँ वो अपने अकेले भी जाता है।

00:16:27 Speaker 1

अच्छा अच्छा जी हाँ इसको अगर रास्ता वगैरह कुछ भी बंद करता है।

00:16:31 Speaker 2

ना जी सबा

00:16:34 Speaker 3



चीज़ खुद करते हैं।

00:16:37 Speaker 3

अकेला हम स्कूल नहीं छोड़ा।

00:16:38 Speaker 1

अकेला नहीं छोड़ा।

00:16:39 Speaker 3

पाए। ठीक है।

00:16:41 Speaker 1

ठीक है इसमें तो क्या क्या है? फिर कठिनाई आती है। कैसे? मतलब आप सिखाने में क्या क्या प्रॉब्लम आ रही है आपको बच्चे को?

00:16:45 Speaker 3

वो हम वो लेके आते हैं और कुछ लेके आते हैं या बस से तीन घंटा छोटी छोटी अपने।

00:16:52 Speaker 1

लेके गए मतलब आपने अभी तक नहीं सिखाया के बच्चों को अभी तक नहीं सीखा पाए।

00:16:56 Speaker 1

ठीक है, इसके लिए भी वो चीजें हमें डालनी होगी। अच्छा नंबर 22 है जो हमारा अपने बच्चों को उसकी शक्ति पहचानने में की अपनी स्ट्रेंथ को पहचानने है। ना अपनी जो अंदर क्षमता होती है, उस क्षमता को पहचाने उसमें आपको कौनकौन सी कठिनाइयों का सामना करना पड़ता है? क्योंकि आत्म जो क्षमता हमारे पास है, हम सबके पास होती है तो वो

00:17:17 Speaker 1

टैच करना, उसको समझाना बहुत ही डिफिकल्ट है। बहुत मुश्किल होता है और स्पेशल बच्चों के लिए तो और ज्यादा डिफिकल्ट होता है। हम मैं ही आपको समझाऊँ तो बड़ा मुश्किल होता है की भाई आपके पास ऐसी क्षमता है क्यों दुखी हो रहा है? आप ये सब कर सकते हो वो कर सकते हो राइट बट वो जब स्पेशल बच्चे होंगे तो और भी ज्यादा तकलीफ होती होगी, तो फिर आप कैसे करते हैं?

00:17:33 Speaker 2

नहीं उसको समझाते हैं बैठ कर कि तुम कर सकते हो, करो अपने खुद से करो। ये काम इस स्कूल का काम है या कोई भी काम है, समझाते हैं तो फिर रोने लगता है कि नहीं होगा मेरे से मैं नहीं कर पाऊंगा, लेकिन फिर भी हम उसको डांट देंगे, नहीं करना तुम्हें ही है, तुम ही कर सकते हो कोई और करने नहीं आएगा इस काम के लिए जी।

00:17:48 Speaker 3

जी हाँ, हम लोग बोलते हैं उसको करने के लिए।

00:17:51 Speaker 3

यही कभी लापरवाही करता है कभी कर देता है आना पुलिस को हम समझाता है कि तुम को काम करना है, ये पुलिस लेके जाना है ये गिलास लेके आना है।

00:17:58 Speaker 1

ये तुम कर सकते हो इस तरीके से कभी?

00:18:00 Speaker 3

कभी करता, कभी वो लापरवाही करता है।

00:18:03 Speaker 1

अच्छा अच्छा।

00:18:05 Speaker 1

कभी ऐसा बोला की नहीं तुम कर सकते हो और तुम्हारे में ये कोई बड़ी बात नहीं है। तुम्हारे हाथ में है, तुम आराम से कर सकते।

00:18:10 Speaker 3

हो। हम तो आते हैं लेकिन वो मेरा बाता।

00:18:12 Speaker 1

नहीं मान पाता है। जी जी वही सब जानना है अक्ववली हाँ, वही सब चीज़े है की जो नहीं जान पाता है मेरे को उसी पे जानना है उसी पे मेरा काम कोई करेगा?

00:18:20 Speaker 2

हाँ।

00:18:20 Speaker 1

सतीसवां प्रश्न है अपने बच्चों को नकारात्मक नामों या शब्दों से?

00:18:25 Speaker 1

बचाने के लिए आपको कौन कौन सी कठिनाइयों का सामना करना पड़ता है? कई बार्स क्या होता है मोहल्ले में उसको गलत तरीके से नहीं, उसका असली नाम ना वो उसे नहीं बुलाते। बट वो लोग दूसरे दूसरे नामों से बुलाना स्टार्ट करते है। ये आपने बहुत देखा होगा तो उस टाइम पे आपको किस तरीके से उसको बच्चों को मोटीवेट करते है या आप कैसे मोटीवेट करवाते है बच्चों को?

00:18:42 Speaker 2

जैसे कोई बच्चा कुछ गलत बोलता है या उल्टा बोलता है तो उसको हम बोलते हैं या तो मम्मी को बोलकर आओ उनकी वो शिकायत करके आओ उनसे वो डांटेंगी अगर हम कुछ कहेंगे तो भी गलत बात हो जाती है।

00:18:51 Speaker 1

हाँ, लेकिन वही बच्चे को किस तरह समझाते हैं अपने बच्चे की वो भी सुन रहा है समझ रहा है।

00:18:55 Speaker 2

जी हाँ

00:18:56 Speaker 1

हाँ

00:18:56 Speaker 2

बताते हैं कि अगर वो कह रहा है गलत बोल रहा है तो उसको तुम भी डांटो और मम्मी शिकायत भी करके आओ लेकिन मार पिटाई नहीं करना बसा

00:19:03 Speaker 3

जी जी हम लोग समझाते हैं वही बात हाँ ना की कोई बच्चा के साथ गया उसको ही नहीं स्लिप नहीं करता है तो हम लोग बोले छोड़ दूसरे साथ मत जा, आज मान जाते हैं नहीं जाता है

00:19:13 Speaker 1

अच्छा जी

00:19:13 Speaker 3

अरे ये बात नाम वाला है तो नाम से ही है

00:19:17 Speaker 1

वो सबका बोलते है

00:19:18 Speaker 3

हम लोग, हाँ, सब वही सीखो, हाँ

00:19:20 Speaker 1

लेकिन वही की उससे कई बार दुखी हो जाता है

00:19:22 Speaker 3

हाँ, हाँ ये भी

00:19:25 Speaker 1

समझते हैं ऐसी बात नहीं है की नहीं समझ रहे

00:19:26 Speaker 3

है तो उसमें क्या करना पड़ता है?

00:19:28 Speaker 1

फिर आपको क्योंकि इसमें बाहर करना

**00:19:30 Speaker 3**

मुसीबत तो आती।

**00:19:31 Speaker 1**

होगी कुछ।

**00:19:31 Speaker 3**

तो तकलीफ तो होती है।

**00:19:36 Speaker 3**

समझाना पड़ता है दोबारा बंदो को।

**00:19:38 Speaker 1**

नहीं, बच्चों को ऐसे समझाया था क्योंकि मैं तो फिर ऐसे बनाऊंगा कि है ना? किस तरह से बच्चों को समझाया जाए, क्या करना चाहिए? कोई बात नहीं।

**00:19:44 Speaker 2**

कह रहा था उसको डॉट को, फिर उसको एक नहीं।

**00:19:46 Speaker 3**

हो हाँ, अगर उसको समझाया था बच्चा को खुद जाने के लिए और ना समझ जाता है आपको।

**00:19:50 Speaker 2**

तो बोलो के ना दुबारा नहीं बोलना है।

**00:19:51 Speaker 1**

ठीक है, छोड़ो, लेकिन छोड़ो जाने से फिर दिक्कत हो जाएगा।

**00:19:55 Speaker 1**

अगर मैं ये बोलेंगे की छोड़ो जाने दो तो दिक्कत हो जायेगा है ना? तो इस पे भी कुछ न कुछ जरूरी है अच्छा चौबीसवा प्रश्न है मेरा अपने बच्चों को? स्कूल या समाज में समावेशन सुनिश्चित करने के लिए आपको कौन कौन सी समस्याओं का सामना करना पड़ता है? समावेशन स्कूल में मतलब की आप चैनल स्कूल में डालो।

**00:20:13 Speaker 1**

तो वहाँ पे आपने भी डाला होगा क्या क्या समस्या का सामना करना पड़ा तो?

**00:20:16 Speaker 2**

वहाँ कोई दिक्कत आई है? टीचर्स भी नहीं समझ पाते हैं और एक तो वो लिख नहीं पाता है ठीक से एंडिंग। अगर उसकी प्रॉब्लम होती है तो मैं भी उसकी बोलती है की इसपे थोड़ा ध्यान दो, उसको स्पेशल गई स्कूल में या फिर कुछ करवाओ।

**00:20:30 Speaker 2**

तो हम लोग उसको ऐडमिट भी करवाया था। हॉस्पिटल में देखने के लिए की मैएंड में कोई प्रॉब्लम तो नहीं है? इसके एमआरआइ वगैरह सब चीज़ सब चीज़ नॉर्मल आयी थी। बस पढ़ाई में उसकी दिक्कत है की उसको समझने में कोई दिक्कत होती है। पढ़ाई में बाकी और कोई दिक्कत नहीं।

**00:20:43 Speaker 1**

है। अच्छा आपने कभी जनरल स्कूल में डाला?

**00:20:44 Speaker 3**

नहीं है। हम लोग राय लिए थे स्कूल में तुम टीचर ने बोला की ना उसमें आप लोग?

**00:20:50 Speaker 3**

ताकि वो बच्चा जो है सो मजाक उड़ाएगा हमारे यहाँ पे, इसमें हम राय नहीं लेंगे किसी और उसकी मदद।

**00:20:57 Speaker 1**

बट अक्ववली में ये गैरकानूनी है कि मतलब कोई प्रिन्सिपल इस तरह से मना करता है।

**00:21:04 Speaker 3**

ये सब मजाक किया है।

**00:21:07 Speaker 2**

अभी भी अडमिशन जो है उसका।

**00:21:08 Speaker 3**

अभी हम अडमिशन नहीं कराए।

**00:21:10 Speaker 1**

अडमिशन नहीं।

**00:21:11 Speaker 2**

पढ़ाया है अभी तक आप लेकर आए।

**00:21:13 Speaker 1**

जी।

**00:21:14 Speaker 3**

अक्ववली भाई सब कराए है सब करेज है नॉर्मल सब कुछ।

**00:21:17 Speaker 1**

नहीं अक्ववली वही समस्या आ रही थी ना की बच्चे का स्कूल में अडमिशन करा रहे हैं वहाँ पे बेस पर मना कर रहे हैं। फिर इस तरह से मैंने अभी।

00:21:24 Speaker 2

स्कूल ने मना नहीं किया हमें तो खैरा

00:21:27 Speaker 3

मुंबई में सराह दिए थे।

00:21:28 Speaker 3

देखिए सब बच्चा है वो मजाक उड़ाएंगे इसको मारेगा कितना कितना बोलती है, क्या मुश्किल देखेंगे हाँ?

00:21:34 Speaker 2

हाँ, हाँ।

00:21:35 Speaker 3

उससे अच्छा है कुछ भी है सब बच्चा वो उसी में लगता है।

00:21:38 Speaker 1

अच्छा।

00:21:38 Speaker 3

की हम दिल ही लेके।

00:21:40 Speaker 1

आए ठीक है, तो पच्चीसवां प्रश्न है अपने बच्चों को खुद से खुद के लिए बोलना।

00:21:45 Speaker 1

है ना की खुद के लिए भाई मेरे को वाशरूम जाना है भूख लग रही है, प्यास लग रही है राइट और मेरी ही जरूरत है अपनी जरूरत को बताए जा के है ना ये सब सिखाने में आपको कौन कौन सी कठिनाइयों का सामना करना पड़ता है?

00:21:57 Speaker 2

नहीं, इसके लिए तो कोई प्रॉब्लम नहीं आई हमें उस।

00:21:59 Speaker 1

स्टार्टिंग में कई प्रॉब्लम आई।

00:22:00 Speaker 2

हुई है, नहीं नहीं छोटा था तब तो हमें खुद ही करना पड़ता था, लेकिन जब से।

00:22:03 Speaker 2

थोड़ा बड़ा हुआ है तो खुद से ही सब काम अपने से कर पाएंगे।

00:22:06 Speaker 1

जी।

00:22:06 Speaker 3

आपने छोटा में तो हम लोग उसको किये लेकिन अभी सब उसको पिया सा रहता है, बोतल गिलास लेके आता है, मेरे पास सभी फूल के पी लेता है।

00:22:13 Speaker 1

जैसे अभी जैसे माँ एम लेके आयी थी।

00:22:16 Speaker 3

नहीं तो चैन वाला, है ना?

00:22:18 Speaker 1

अच्छा तो चैन नहीं खोल पा।

00:22:21 Speaker 3

रहा है निकाल के।

00:22:23 Speaker 3

बस में चल जाएगा हाँ ना वो चला जाएगा लाइन चला देगा अपने से चला जाएगा बस में पढ़ लेगा, लेकिन हम।

00:22:32 Speaker 1

अच्छा।

00:22:35 Speaker 3

हाँ, कभी वो अपना टाइम जाता।

00:22:38 Speaker 1

है।

00:22:39 Speaker 3

कभी।

00:22:40 Speaker 1

आपने सिखाया नहीं की मतलब कैसे?

00:22:41 Speaker 1

दोना कैसे है?

00:22:42 Speaker 3

क्या कभी हम नहीं सीखे?

00:22:43 Speaker 1

नहीं सीखा पाए।

00:22:44 Speaker 3

नहीं।

00:22:44 Speaker 1

नहीं।

00:22:44 Speaker 3

ठीक है, लगता है, ऐसे निकाल के पढ़ लेगा।

00:22:47 Speaker 1

अच्छा।

00:22:47 Speaker 3

क्लासरूम लगेगा तो खुद चला जाएगा अंदर।

00:22:49 Speaker 1

हाँ, हाँ, नहीं, सब एक एक चाहिए।

00:22:52 Speaker 3

ताकि मैं हाँ वो नहीं कर पता।

00:22:54 Speaker 1

है। अच्छा जी ओके छब्बीसवां प्रश्न है एका।

00:23:00 Speaker 1

सुरक्षित और सहयोगी घर बनाने के लिए मतलब एक अच्छा घर बनाने के लिए जिसमें भाई बच्चा सुरक्षित भी रहे और सहयोग भी रहे उसको लगे की नहीं मेरे मम्मी पापा मेरे पीछे हैं। ऐसा घर बनाने के लिए कुछ वातावरण में कुछ इश्यूस आ रहा हो, कुछ प्रॉब्लम आ रहा हो। हो सकता है घर पे कोई सपोर्टिव ना हो कहीं कोई ऐसा कोई।

00:23:17 Speaker 1

पड़ोसी या आस पास में कोई भी हो सकता है जो।



00:23:19 Speaker 2

नहीं ऐसा ऐसा कोई

00:23:20 Speaker 1

नहीं है सरा

00:23:21 Speaker 3

जी ना, घर के सपोर्ट है।

00:23:22 Speaker 1

सभी लोग।

00:23:23 Speaker 3

हाँ, पड़ोसी उस सब को सपोर्ट है की बच्चा ठीक हो जाए और कोई बात नहीं है।

00:23:28 Speaker 1

अच्छा।

00:23:28 Speaker 3

ऐसे प्रॉब्लम किसी से नहीं है और उसी के ऐसे घर कहते हैं मेरा किसी का प्रॉब्लम नहीं है। चाचा आदमी की ठीक हो जाए।

00:23:36 Speaker 1

ठीका

00:23:36 Speaker 3

है। अपना वो काम संभाल पाया है नहीं।

00:23:40 Speaker 1

मतलब घर पे ऐसा कोई भी नहीं है ना मतलब कहीं प्रॉब्लम करे की नहीं जी अच्छा सात सप्ताहसवां प्रश्न है अपने बच्चों की जरूरतों को शिक्षकों या देखभाल करने वाले?

00:23:53 Speaker 1

तक पहुंचाने के लिए आपको कौन कौन सी कठिनाइयों का सामना करना पड़ता है? अब जो उनकी जरूरत को पूरा करते हैं जैसे की ये स्कूल के शिक्षक वगैरह है राइट अब यहाँ तक भी पहुंचाने के लिए आपको कुछ कुछ समस्याओं का सामना करना पड़ता है। अगेन सुबह तैयार करना पड़ता होगा, है ना लेके आना पड़ता होगा है ना तो वो सब चीजें मेरे को थोड़ा डीटेल में बताइए ताकि मैं उसके बारे में बना सकूँ। कैसे कह सकूँ?

00:24:13 Speaker 2

जी हाँ, सुबह में जल्दी उठना पड़ता है उसकी वजह से क्योंकि मुझे यहाँ टाइम पर आना होता है, मैं दूर रहती हूँ वो।

00:24:18 Speaker 1

उसको सुबह टाइम पे उठाता है।

00:24:19 Speaker 2

वो अपने नहीं वो खुद से ही टाइम पर 7:00 बजे अपने उठ जाता है बिना कहे।

00:24:23 Speaker 1

अच्छा।

00:24:23 Speaker 2

और अब खुद ही तैयार होता है सब ब्रश वगैरहा सब अपने खुद से करके खुद ही तैयार हो जाते है। नाश्ता करके बैग अपना तैयार करते है।

00:24:30 Speaker 1

अच्छा।

00:24:31 Speaker 2

हाँ, फिर मुझसे ही कहता है कि चलो मम्मी टाइम हो गया, जल्दी निकला।

00:24:34 Speaker 1

अच्छा जी।

00:24:34 Speaker 2

खुदा।

00:24:35 Speaker 1

ही यहाँ पे आ भी जाते हैं।

00:24:36 Speaker 2

जी नहीं मेरे साथ।

00:24:37 Speaker 1

आते हैं आपके साथ जी।

00:24:38 Speaker 2

नहीं।

00:24:39 Speaker 1

जी।

00:24:39 Speaker 3

नहीं हम उसको तैयार कुछ

00:24:41 Speaker 1

पूरा तैयारी करते हैं

00:24:42 Speaker 3

कभी स्कूल की तरह जल्दी कभी हमको उठाना पड़ता है, उठा के लेते हैं उसको बस दांत शिशु कर ले जाता है करता है उसको फिर नाभाते हैं

00:24:49 Speaker 3

नाश्ता कराते हैं, उसकी तैयारी करते हैं

00:24:52 Speaker 1

नाश्ता भी कराना पड़ता है बच्चे

00:24:53 Speaker 3

हाँ, हाँ, नहीं वो अपना नहीं हम फूस खिला लेते

00:24:55 Speaker 1

हैं अच्छा

00:24:56 Speaker 3

क्योंकि हम लोग कम रहता है

00:24:57 Speaker 1

अच्छा

00:24:58 Speaker 3

क्योंकि हम खा लेता है कभी हम खिलाते हैं

00:25:00 Speaker 1

अगर टाइम कम की वजह से आप उसको हाँ

00:25:01 Speaker 3

हाँ हाँ, हाँ हाँ, ये स्कूल में भी जाएगा हाँ

00:25:07 Speaker 1

उसको

00:25:07 Speaker 3

लेके, हम आते हैं।

00:25:10 Speaker 1

अच्छा लेके भी आना और लेके भी जाना है।

00:25:11 Speaker 3

जी हाँ, जी हाँ जी, ये तो कभी।

00:25:16 Speaker 1

बस या ऑटो वगैरा कभी कुछ लगा नहीं क्या इस तरह से कभी ट्राई नहीं किया?

00:25:20 Speaker 2

नहीं काफी दूर है यहाँ से ऑटो बस को नहीं लग सकता हमारा।

00:25:23 Speaker 3

नहीं, हम ऑटो से।

00:25:25 Speaker 1

आते हैं।

00:25:26 Speaker 3

हम ऑटो से।

00:25:27 Speaker 1

आते हैं तो ऑटो वगैरा से वो मतलब वो?

00:25:29 Speaker 1

ठीक से बैठना होता।

00:25:31 Speaker 3

है।

00:25:32 Speaker 1

नहीं मतलब वो खुद से ऑटो कर पाते हैं कि नहीं? वो तो नहीं कर पाते होंगे, वो नहीं है ना वो कहाँ भी कर पाएंगे ठीक है, ठीक है अट्टाईसवां प्रश्न है अपने बच्चों को घर के छोटे छोटे कार्यों में शामिल करने में कौन कौन सी कठिनाइयों का सामना करना पड़ता है?

00:25:48 Speaker 1

कई बार बच्चों का मन नहीं हो रहा है या फिर चीज़े नहीं कर रहा है ना तो फिर उस टाइम पे कुछ काम कराना है या छोटे मोटे काम है। घर के जो नहीं करते बच्चे कई बार है ना? बड़े बच्चे जनरल बच्चे भी नहीं करते तो तो उसमें क्या क्या प्रॉब्लम आती है आपको?

00:26:00 Speaker 2

उसमें थोड़ा उसको लालच देना पड़ता है। काम के लिए की ये काम कर कराओ तो तुम्हे पैसे देंगे या तुम्हे फ़ोन देंगे देखने के लिए?

00:26:07 Speaker 2

तब वो करते हैं वरना उनका मन नहीं है तो नहीं करते।

00:26:09 Speaker 1

अच्छा।

00:26:09 Speaker 3

जी जी उसको समझाना पड़ता है उसको प्यार मोहब्बत देना पड़ता है उठा कर लाओ ये लेके जा तो करता है लाएगा तुमको बिस्कुट देंगे हाँ समझ।

00:26:21 Speaker 2

जाता।

00:26:22 Speaker 1

है।

00:26:23 Speaker 2

की लालच देना।

00:26:25 Speaker 3

पड़ता है।

00:26:26 Speaker 3

ठीका

00:26:26 Speaker 1

है। उनतीसवां प्रश्न है अपने बच्चे के लिए, परिवार का को सहयोगी बनाए रखने में कौन कौन सा समस्या ये हो चुका था? हमारा आई थिंक हाँ थर्टीतवा हमारा क्लेशन है अपने बच्चों के लिए चिकित्सा या विकासात्मक सहायता प्राप्त करने में किन किन बाधाओं का सामना करना पड़ता है? अब चिकित्सा वगैरह आपको पता है यहाँ पे बहुत महंगी पड़ती होगी।

00:26:46 Speaker 1

जी है ना वो तो आपको पता है, स्पेशल बच्चों के लिए बड़ा महंगा पड़ता है और उसके कुछ भी फिजियोथेरेपिस्ट, ओफोपेशन थेरेपिस्ट ये सब बाहर से कराना वगैरह आपको पता है, उसके भी बहुत सारे क्लिनिक्स हैं, बहुत पैसा लगता होगा तो क्याक्या कठिनाइयों का सामना करना पड़ता है ऐसे आपको?

00:26:59 Speaker 2

वैसे अभी तक तो कोई थेरेपी वगैरा भी ली नहीं। अभी नहीं ली है आपने कभी भी नहीं ली है नहीं नहीं कभी नहीं।

00:27:03 Speaker 1

अच्छा, अच्छा और आप।

00:27:06 Speaker 3

यहाँ पर किया था बाद में वो नहीं कराते।

00:27:09 Speaker 1

अच्छा, बाहर कभी आपने थेरेपी वगैरह नहीं कराया? कुछ भी नहीं कराया।

00:27:11 Speaker 3

नहीं, अभी नहीं कराया है। एक बार गए थे बम्बई, कराया लेकिन हाँ।

00:27:15 Speaker 1

हाँ।

00:27:15 Speaker 3

वो समझ में नहीं आया।

00:27:17 Speaker 1

अच्छा तो उसमें क्या समस्या आई थी? मतलब आपको क्या नहीं समझ में आया था आपको?

00:27:21 Speaker 3

वही मतलब पुराने वाले का प्रोग्राम होंगे।

00:27:24 Speaker 1

अच्छा, अच्छा, अच्छा अच्छा।

00:27:26 Speaker 3

लेकिन क्या है? लेकिन कुछ मुझे चांस मिलेंगे ना?

00:27:29 Speaker 1

अच्छा अच्छा तो अभी फिलहाल यहीं पे रह रहे हैं जी तो यहाँ पे भी मतलब आपको ठीक है, कोई प्रॉब्लम नहीं है बाहर से आप कभी कुछ नहीं कराते आपका स्कूल पे लेवल पे। जो भी ऑक्यूपेशन थेरेपी फिजियोथेरेपी मिल जाता है, है ना वही सब चीजें?

00:27:41 Speaker 3

ना ना?

00:27:42 Speaker 1

अच्छा स्कूल में ही हूँ, ठीक है?

00:27:46 Speaker 3

है बच्चों की मोहब्बत है।

00:27:48 Speaker 1

अच्छा ठीक है, मेरा आखिरी जो प्रश्न है वो है इन जितनी भी चुनौतियों के बारे में हमने बात किया। इन चुनौतियों में आपका आपके लिए किस प्रकार से मदद मिल सकती है? क्या ऐसा कुछ काम हो सकता है?

00:28:03 Speaker 1

या फिर हम जैसे कुछ मॉड्यूल वगैरा कुछ इस तरह से बनाए या कुछ ऐसा आपको लगता है की कुछ ऐसा चीजें होनी चाहिए की पेरेंट्स के हाथ में भी की वो पढ़े और समझ पाए की नहीं ऐसा बाकी इससे कुछ फायदा हमारे पास हो सकता है।

00:28:14 Speaker 2

हाँ, होना तो चाहिए। वैसे मतलब पेरेंट्स भी अपने बच्चे के लिए थोड़ा कुछ कर सके घर पे।

00:28:20 Speaker 1

अच्छा।

00:28:20 Speaker 2

जी।

00:28:22 Speaker 1

जब घर पे के लिए कुछ ना कुछ आपके पास होना।

00:28:25 Speaker 3

चाहिए ताकि हम लोग को भी नॉलेज हो जाए। किसी बच्चों को हम लोग सिखाये।

00:28:29 Speaker 1

अच्छा घर पे ये।

00:28:30 Speaker 3

तो अच्छी बात है।

00:28:31 Speaker 1

जी जी।

00:28:32 Speaker 3

बहुत अच्छी बात है आप से हेल्प किया है जी जी ताकि हम लोग भी उसको।

00:28:36 Speaker 1

10 नौ में से आपको लगता है की कई सारी प्रोब्लम्स का सलूशन हमारे पास बन सकता है बढ़ सकता।

00:28:41 Speaker 3

है।

00:28:42 Speaker 1

जी जी, मैं इसके साथ आपको दोनों को धन्यवाद देना चाहूंगा। आपने बड़े अच्छे से मेरे सारे प्रश्नों का जवाब दिया, उसके लिए धन्यवाद। आप दोनों का  
थैंक यू।

---

Audio file

[Parents 2.m4a](#)

Transcript

00:00:00 Speaker 1

ओके, मेरा नाम मिस्टर अनु श्रीवास्तव है मैं आप लोगों का दो पेरेंट्स हैं मेरे सामने परवीन एंड फराह माँ ऐंमा मैं आपका डेटा लेने  
के लिए यहाँ पर आया हूँ जो कि साइकोसोशियल इंटरव्यू स्केड्यूल है जिसको हम कहते हैं मनोसामाजिक चुनौतियों का साक्षात्कार  
अनु अनुसूची राइट सो।

00:00:20 Speaker 1

आपका नाम क्या है?

00:00:21 Speaker 2

परवीना

00:00:22 Speaker 1

परवीन और आपके बच्चे का नाम।

00:00:24 Speaker 2

अब्बू बकर सिद्दीकी।

00:00:25 Speaker 1



ठीक है, मैं आपसे परमिशन चाह रहा था कि आपकी ये ऑडियो रिकॉर्डिंग हो सके तो क्या आप परमिशन देते हैं?

00:00:30 Speaker 3

जी।

00:00:31 Speaker 1

जी आपका नाम क्या है?

00:00:35 Speaker 4

फराहा

00:00:35 Speaker 1

फराहा आपके।

00:00:36 Speaker 4

बच्चे का नाम है अरहम खाना

00:00:38 Speaker 1

जी, मैं आपसे भी परमिशन चाह रहा था ताकि आपके ऑडियो रिकॉर्डिंग हो सके।

00:00:42 Speaker 4

जी।

00:00:43 Speaker 1

जी ठीक है मेरे सामने कुछ 30 क्वेश्चन्स हैं, 31 क्वेश्चन्स हैं। टोटल मैं आपसे और पूछना चाहूंगा मैं पहला क्वेश्चन आप लोगों से पूछ रहा हूँ की अपने बच्चे को प्रतिदिन के काम या पढ़ाई पूरी कराने में?

00:00:56 Speaker 1

आपको कौनकौन सी कठिनाइयों का सामना करना पड़ता है?

00:01:00 Speaker 2

अब कठिनाइयों का यह सामना के बच्चे जल्दी मतलब बैठते नहीं, न पढ़ने के लिए कुछ करने के लिए तैयार नहीं होते। थोड़ा इनके साथ बच्चों के साथ मेहनत बहुत चाहिए होती।

00:01:11 Speaker 3

है।

00:01:11 Speaker 1

मोटिवेट नहीं होते कुछ भी काम करने के लिए

00:01:15 Speaker 2

नहीं करने के लिए तैयार होते हैं ना तो बहुत ही ज्यादा इनके साथ में मेहनत करनी होती है।

00:01:19 Speaker 3

जी जी जी जी।

00:01:22 Speaker 4

हमारे और हम के साथ ये प्रॉब्लम है की जल्दी से तो वो तैयार होता नहीं है, अगर दूसरे बच्चों को उन्हीं के साथ में बिठाती हूँ तो जब तो थोड़ा शुरू हो जाता।

00:01:34 Speaker 3

है।

00:01:34 Speaker 3

जी जी बड़ी सर जी।

00:01:35 Speaker 4

और फिर मतलब कि करने की कोशिश भी करता है, मगर बहुत ज़िद करने के बारे में।

00:01:41 Speaker 3

अच्छा।

00:01:42 Speaker 1

मतलब बहुत ज्यादा थोड़ा ज़िद करता है।

00:01:44 Speaker 3

वो कर पाता।

00:01:45 Speaker 1

है या फिर अगर मैं किसी के साथ बैठाता हूँ तो वो काम कर लेता है?

00:01:48 Speaker 4

मतलब कि उसका दिल होगा तो करेगा।

00:01:50 Speaker 4

अगर चाहे 10 भी बच्चे बैठे होंगे नहीं करेगा तो वो नहीं करेगा।

00:01:54 Speaker 3

अच्छा ठीक है।

00:01:56 Speaker 1

मेरा दूसरा प्रश्न है, जब आप अपने बच्चों की क्षमता के अनुसार लक्ष्य तय करते हैं तो उसकी क्षमता है, उसके अनुसार लक्ष्य तय करते हैं तब आपको कोई कठिनाई का सामना करना पड़ता है।

00:02:07 Speaker 2

कठिनाई क्या बस इन बच्चों में तो बहुत ही ज्यादा।

00:02:11 Speaker 2

मतलब प्रॉब्लम रहती है इनके साथ तो बस लगने ही पड़ता है ज्यादातर।

00:02:18 Speaker 3

जी जी।

00:02:18 Speaker 2

जैसे कहीं छोड़ भी नहीं सकती हूँ इनके साथ ही रहना पड़ता है मुझे अच्छा और क्या?

00:02:25 Speaker 3

अच्छा।

00:02:26 Speaker 1

आप बताना चाहेंगे कुछ?

00:02:28 Speaker 4

इनके साथ तो ये है की अब तो मुझे ही बिल्कुल भी नहीं छोड़ आया। पहले तो मैं छोड़ता ही नहीं चली भी जाती थी। चार 4 घंटे के लिए, पांच 5 घंटे के लिए। अब तो ये चाहता है की मम्मा पहले रहे, बाद में मैं रहूँ।

00:02:41 Speaker 3

अच्छा नहीं, अच्छा।

00:02:44 Speaker 1

जब आप कोई बच्चों की अक्टिविटी कराते हैं जैसे कि ड्राइंग हो, रीडिंग हो, कुछ ऐसा अक्टिविटी करवाते हैं चित्रकारी वगैरह आप करवाते हैं बच्चों के साथ, तो उसमें उनको शामिल करने में कौन कौन सी प्रॉब्लम होती है आपको?

00:02:55 Speaker 2

ये बस उनकी मर्जी होती है। ड्राइंग जैसे करवाते हैं, अगर उनके दिल है तो कर लेंगे, नहीं तो नहीं।

00:03:02 Speaker 3

अच्छा उसके बगैर नहीं आप।

00:03:04 Speaker 4

नहीं नहीं करा। मतलब की यह है कि उनकी ड्राइंग में अगर दिल लग रहा है कि मम्मा मैं करूंगा, मैं करने के लिए बैठूंगी, छोटे वाले को बैठाऊंगी तो जब उसका दिल करेगा तो करेगा, नहीं होगा तो मम्मा आप कर दो, मैं नहीं करूंगा येस?

00:03:22 Speaker 3

ठीक है।

00:03:24 Speaker 1

अपने बच्चों के प्रयास की सराहना करने में आपको कौन कौन सी कठिनाइयों का सामना करना पड़ता है? कई बार से बच्चे ने बहुत अच्छा काम किया है। मैं उसको सराह रहा हूँ, बहुत अच्छा काम किया है लेकिन उसमें भी कई बार हमें पेंट्स को कठिनाई का सामना करना पड़ता है की समझ नहीं आ रहा है क्या इश्यू है है ना? तो उसमें आप क्या कहना चाहेंगे?

00:03:43 Speaker 2

मतलब बच्चे को जैसे अब काम में करा रही हूँ, अब बच्चे ने कर लिया तो मैं शाबाशी उसे देती हूँ, झूठ कहती हूँ तो वो खुश हो जाता है बच्चा।

00:03:51 Speaker 3

अच्छा।

00:03:52 Speaker 2

फिर आगे करने की थोड़ी कोशिश करता।

00:03:54 Speaker 1

है। अच्छा मतलब उसको समझ लेता है आप कह रही है।

00:03:57 Speaker 1

कोई ऐसी समस्या, कोई भी प्रॉब्लम ऐसी आती हो?

00:04:01 Speaker 3

सरहना करने में या कुछ नहीं।

00:04:02 Speaker 4

ऐसा नहीं बताने।

00:04:03 Speaker 1

में कई बार बच्चा नहीं समझ पा रहा है।

00:04:05 Speaker 4

नहीं, ऐसे नहीं आती है।

00:04:06 Speaker 3

ऐसा कुछ नहीं है, ठीक है?

00:04:09 Speaker 4

वो समझता सारी बात।

00:04:11 Speaker 1

ओके छठवाँ प्रश्न हमारा है सिक्स्थ क्वेश्चन अपने बच्चे बच्चों को?

00:04:17 Speaker 1

दोस्त बनाने या दोस्ती बनाए रखने में कौन कौन सी समस्याओं का सामना करना पड़ता है?

00:04:23 Speaker 4

हमारा वाला तो दोस्त बहुत जल्दी बनाता।

00:04:26 Speaker 3

है। अच्छा।

00:04:27 Speaker 4

हाँ, मगर उसके दोस्त स्पेशल ही होते हैं कि उनके लिए चाहेगा कि हर टाइम मेरे पास ही रहे कौन करेगा या कुछ करेगा?

00:04:36 Speaker 4

मगर स्कूल में कोई इतना खास पैर नहीं है।

00:04:38 Speaker 1

अच्छा आस पड़ोस में कम्युनिटी में

00:04:40 Speaker 4

मतलब ये अपने इसके साथ कैसे इसके चाचा हैं उन्हें के साथ खेलना, वो करना, उन्हें फ़ोन करना सब चीज़ करेगा। उन्हें माँ और दादा से भी बिल्कुल क्लोज़ है। मगर स्कूल में कोई नहीं है जितना।

00:04:55 Speaker 3

अच्छा।

00:04:57 Speaker 2

ये जो है, दोस्ता

00:04:57 Speaker 4

तो?

00:04:58 Speaker 2

बना लेता है। फिर ज़रा देर उसके साथ खेलेगा। फिर जो है मारपीट चालू कर देता।

00:05:04 Speaker 3

है ये?

00:05:04 Speaker 1

करता है तो मतलब वो दोस्ती बनाये रखने में थोड़ा प्रॉब्लम आ रही है। दोस्ती लेकिन कर लेते हैं।

00:05:09 Speaker 2

कर लेते हैं। मतलब बस थोड़ी देर करेंगे। उसके बाद में उसको पीटना चालू।

00:05:15 Speaker 3

अच्छा।

00:05:15 Speaker 2

हाँ।

00:05:16 Speaker 3

जी।

00:05:16 Speaker 2

है।

00:05:16 Speaker 1

तो दोस्ती में ये जनरल बच्चों के साथ सबके साथ ही इन्वॉल्व होते हैं जी।

00:05:19 Speaker 2

जी।

00:05:20 Speaker 3

जी ठीक है।

00:05:22 Speaker 1

अगला क्वेश्चन सातवाँ है, हमारा बच्चे को सामाजिक कौशल सिखाने में जैसे कि बांटकर खाना है ना बारी लेने का इंतजार करना एसएमएस में या सहयोग का इंतजार करना एक दूसरे की हेल्प करना है ना?

00:05:34 Speaker 1

ऐसी चीजों को सिखाने में कोई कठिनाई का सामना करना पड़ता होगा आपको।

00:05:37 Speaker 2

सिखाने क्या आप जैसे खाना मांग रहे हैं? मैं कह रही हूँ बेटा वेट करो, दो महीने ला रही हूँ, किचन में जा रही हूँ मगर वो वेट नहीं करेंगे। नहीं लाओ मतलब कहते रहते बस लाओ लाओ मतलब इतना समझ नहीं है कि वेट करूँ, मम्मा लेने गई है, ऐसा कुछ नहीं है। मुझे इतनी समझ नहीं।

00:05:54 Speaker 4

है।

00:05:54 Speaker 3

जी।

00:05:55 Speaker 4

नहीं यार, हमें ये प्रॉब्लम नहीं है।

00:05:57 Speaker 3

अच्छा।

00:05:57 Speaker 4

मतलब ये उससे मैं कह दूंगी कि भाई के साथ खाना खाना है तो वो 3:04 बजे।

00:06:02 Speaker 1

मिल बाँट के खाते हैं।

00:06:04 Speaker 4

मिल उसके लिए पहले लेगा कोई भी चीज़ लाएगा बाहर से पहले उसके लिए लेगा भाई के लिए बाद में अपने लिए।

00:06:10 Speaker 1

और मिलके गेम खेलते हैं सब दोस्तों, लोगों के साथ।

00:06:13 Speaker 4

गेम नहीं खेलता हूँ।

00:06:14 Speaker 1

हाँ, मैं वही बताना बारी लेने का भी इंतज़ार करना गेम में तो बारी लेना पड़ता है एक दूसरे।

00:06:18 Speaker 4

से हाँ, मगर कह दोगे नहीं की ना हम खेलेंगे। हम सारे के सारे तो उनके साथ खेल भी लेता मगर ऐसा नहीं है की बिल्कुल रोज़ ही खेलना।

00:06:29 Speaker 1

मिल बाँट के मतलब खेलने में थोड़ा दिक्कत होता है। ग्रुप वाले गेम में दिक्कत होता होगा।

00:06:32 Speaker 4

अपने भाई बहनों के साथ खेल लेते।

00:06:34 Speaker 1

हैं भाई बहनों के साथ बाहर मुश्किल।

00:06:36 Speaker 4

होता है हाँ, बहुत।

00:06:37 Speaker 1

जी ठीक है अगला क्वेश्चन एयट क्वेश्चन हमारा है जब आपका बच्चा समूह गतिविधियों और खेलों में भाग लेता है तो कौनकौन सी सैटिनरी का सामना करना पड़ता है? जो जनरलली आप बता ही रहे हैं इस वक्त थोड़ा सा और उसमें प्रकाश डाल दीजिएगा। एका।

00:06:48 Speaker 1



या जो ग्रुप अक्टिविटीज है, ग्रुप गेम्स है, बच्चे लोग कम्यूनिटी में खेलते हैं तो क्या?

00:06:53 Speaker 2

करता हूँ जैसे दौड़ लगाता है, उसके पैर में दर्द हो जाता है, मतलब दौड़ता नहीं है। अब जैसे स्कूल आता है तो मैं गोद में ले कर आती, कहता है मम्मा इधर नहीं, वो तो।

00:07:02 Speaker 1

ग्रुप में नहीं हुआ ना ग्रुप में खेलना, ग्रुप में खेलना मतलब ऐसे चार पांच दोस्त लोग क्या मिलकर खेल रहा है?

00:07:08 Speaker 2

मिलकर बता तो रही खेलता है मतलब बस थोड़ी देर मुँह उठे उनका अगर खेले तो खेले नहीं तो नहीं।

00:07:14 Speaker 3

अच्छा अच्छा।

00:07:15 Speaker 2

ये।

00:07:16 Speaker 3

हाँ।

00:07:16 Speaker 4

ये तो खेल लेता है।

00:07:17 Speaker 3

अच्छा।

00:07:18 Speaker 2

हाँ।

00:07:18 Speaker 3

ठीक है, ठीक है।

00:07:20 Speaker 1

फिर उसके बाद बच्चों को कोई ट्रेनिंग कराने में ठीक है?

00:07:28 Speaker 1

अपने बच्चों को दूसरों के साथ सहयोग का महत्व समझाने में क्या कठिनाई का सामना करना पड़ता है।

00:07:34 Speaker 2

मतलब अब जैसे कोई बच्चे आये हुए हैं तो मैं कहती नहीं बेटा ये भाई है या बहन है, मतलब इसके साथ खेलो, इसको मारो नहीं।

00:07:44 Speaker 2

तो थोड़ी देर तो समझ जाएंगे और फिर ज़रा देर खेलते खेलते फिर उसको।

00:07:48 Speaker 3

भूल जाना।

00:07:49 Speaker 2

शुरू हो जाता है।

00:07:50 Speaker 3

ठीक है, आप।

00:07:52 Speaker 4

उसके साथ एक प्रॉब्लम नहीं है, वो मतलब की दूसरों के साथ बहुत जल्दी क्लोज़ हो जाता है। एक बार आपका भी नाम पूछ लिया, वो कभी नहीं भूलेगा। ये चीज़ उसमें बहुत अच्छी है।

00:08:03 Speaker 3

अच्छा।

00:08:04 Speaker 4

हाँ।

00:08:05 Speaker 1

ठीक है तो मिल के खेल लेते हैं। कभी कोई प्रॉब्लम ऐसी आई नहीं कभी भी नहीं आई।

00:08:08 Speaker 4

नहीं ऐसे नहीं आई। अच्छा मतलब की मूड हुआ तो खेल लिया, अगर नहीं होगा तो मार के भी आ जाएगा बस अब मैं खेलना जाओ।

00:08:15 Speaker 1

अच्छा हाँ तो वो थोड़ा सा गड़बड़ है ना मारना वही तो वही तो मैं जानना चाह रहा।

00:08:19 Speaker 4

हाँ मतलब की उसने गेम में खेल कर खेल कर हाँ?

00:08:23 Speaker 4

अगर उसका दिल वो भर गया बस आप खेल से नहीं खेलना तो बस जवाब तुम खेलना

00:08:29 Speaker 1

हाँ, नहीं वही चीज़ है, वही चीज़ है

00:08:31 Speaker 4

ये ज्यादा प्रॉब्लम आ रही है

00:08:33 Speaker 2

अब करता ही थूकने की आदत हो गई

00:08:36 Speaker 1

अच्छा

00:08:36 Speaker 3

अच्छा अच्छा अच्छा

00:08:38 Speaker 1

गेम खेलते वक्त या कभी किसी के साथ?

00:08:39 Speaker 2

वैसे ही किसी के साथ या घर में मैं हूँ तो मेरे को थूक देगा अपने पापा पे अभी आई है ये मतलब अच्छा करने लगा पहले कभी नहीं करता अभी हाँ अभी से मैं डांटती रहती हूँ

00:08:51 Speaker 3

हाँ, हाँ

00:08:52 Speaker 2

वो कहते है पिटाई करूंगी ऐसे नहीं करते बेटा छूटते नहीं है किसी के ऊपर

00:08:56 Speaker 2

बस ज़रा देर समझ जाते फिर वही ये है

00:09:00 Speaker 3

ठीक है।

00:09:02 Speaker 1

जब आपका बच्चा साथियों के साथ अपने दोस्त लोगों के साथ जब खेल रहा हो तो स्वीकृति अस्वीकृति भी कई बार होती है। यानी दूसरे वाले बच्चे जो हैं वो उनको एक्सेप्ट नहीं कर रहे हैं, साथ में नहीं खिला रहे हैं।

00:09:13 Speaker 1

ठीक है या कोई गलत फैमिली का सामना करना पड़ता है। बच्चों के साथ दूसरे बच्चे भी बोलते हैं भाई हम तुम्हारे नहीं खेलेंगे। बहुत सारे उलटे सीधी बातें बोल देते हैं उस टाइम पे अपने बच्चों को आप किस तरह से सहयोग करते हैं या फिर सहयोग जब करने जाते हैं तो कौन कौन सी प्रॉब्लम्स का सामना करना पड़ता है की मैं समझा रही हूँ।

00:09:27 Speaker 2

जी, जब ये खेलने जाते हैं और बच्चे डरने लगते हैं पहले ही।

00:09:31 Speaker 3

बिल्कुल।

00:09:32 Speaker 2

बिल्कुल।

00:09:32 Speaker 3

जी।

00:09:33 Speaker 2

इसे देखेंगे। फौरन बच्चे भाग जाते हैं, खेलने को तैयार नहीं होते हैं। मैं कहती हूँ नहीं बेटा मैं खड़ी हूँ, आप लोग खेलिए, ये नहीं मारेगा। जब मैं रहती हूँ तो न कुछ करता है शरारत जो मैं इधर उधर हट जाऊँ तो बच्चों को मारने लगता।

00:09:47 Speaker 1

है।

00:09:47 Speaker 2

ये शरारत करने में।

00:09:48 Speaker 1

जब अपने बच्चे को समझाते हैं तब कुछ प्रॉब्लम।

00:09:50 Speaker 2

समझाती हूँ मतलब मैं बुलाती हूँ नहीं आज्ञा बेटा आप मारते तो बच्चे नहीं, आपको खिलाएंगे तो आते नहीं, ज़िद करने लगते फिर मैं जबरदस्ती गोद में उठाकर।

00:10:00 Speaker 4

ले जाती।

00:10:00 Speaker 3

हूँ, ठीक है, आप।

00:10:02 Speaker 4

ऐसे बच्चों के साथ वो बाहर खेला ही नहीं।

00:10:04 Speaker 3

है कभी नहीं खेला है किसी ने अपने।

00:10:07 Speaker 4

अपने मतलब की अपने भाई बहनों के साथ ही खेलता है। ज्यादातर ये चार पांच भाई बहन हो रहे हैं। चाचा के अपने तो ये आपस में खेलते हैं।

00:10:16 Speaker 3

अच्छा बाहर।

00:10:16 Speaker 1

नहीं खेलते।

00:10:17 Speaker 4

बाहर नहीं जाता।

00:10:18 Speaker 1

है बाहर खेलने की।

00:10:19 Speaker 4

जाता है, मगर इस।

00:10:21 Speaker 4

अभी इतनी गर्मी हो रही है, दूसरे बच्चे भी नहीं मिलते हैं इतनी आसानी से।

00:10:25 Speaker 2

मैं तो इसलिए बाहर निकलती नहीं।

00:10:27 Speaker 4

छोड़ती ही नहीं हूँ अच्छा।

00:10:28 Speaker 3

अच्छा।

00:10:28 Speaker 2

की थोड़ी इसकी आदत बने। बच्चों के साथ खेलने की मतलब बच्चों को मारो।

00:10:34 Speaker 1

तो?

00:10:34 Speaker 2

इसलिए मेरा भी बच्चा जाता नहीं, मैं खेत में जाता हूँ।

00:10:38 Speaker 4

गांव में खेलता था।

00:10:39 Speaker 2

मैं जबरदस्ती उसे आधे।

00:10:41 Speaker 2

आधे घंटे 20 मिनट निकालते हूँ मैं खुद खड़े होके हर रोज़।

00:10:44 Speaker 1

थोड़ा सा होना चाहिए।

00:10:45 Speaker 2

पार्क में भी उसके पापा ले जाते हैं। बोल बगैरा उसकी थोड़ी आदत बने बाहर जाने की खेलने।

00:10:51 Speaker 3

की जी नहीं।

00:10:52 Speaker 1

वो ठीक है, अच्छी बात है अगला प्रश्न है ग्यारहवां प्रश्न अपने बच्चों को पढ़ाई या।

00:10:58 Speaker 1

गतिविधियों के लिए प्रेरित रखने में, लगातार पढ़ने में या कुछ ऐसा मोटीवेट करने में आपको कौनकौन सी प्रॉब्लम का सामना करना पड़ता?

00:11:05 Speaker 2

है अब मैं जी मैं तो जो हूँ अबुबकर आइये पढ़ाई करिये मतलब थोड़ा लालच देती हूँ की फूटी दूंगी या मैगी तो जो है आके

00:11:16 Speaker 2

बैठ जाऊँगे, मैं फूटी रख लूंगी पास में पहले ये करिए काम, तभी उसके बाद में मिलेगा तो उसके लालच में थोड़ा कर लेते

00:11:24 Speaker 3

हैं।

00:11:25 Speaker 2

मगर मैं बैठालती डेली हूँ फहाने के लिए

00:11:29 Speaker 1

मतलब मुसीबत तो मतलब तकलीफ तो आती है बहुत ही बहुत ही ज्यादा हाँ रोज रोज की लगभग

00:11:34 Speaker 4

डेली की है।

00:11:36 Speaker 4

जी बाहर जाना है तो पहले ये काम करो जब जाओगे।

00:11:40 Speaker 3

अच्छा।

00:11:41 Speaker 4

नाखून कटवाने हैं तो नाखून जब कटेंगे जब पहले खाना नहीं मिलेगा पहले नाखून कटवाओ वो तो नेल्स भी नहीं कटवाता। हमारा वाला तो बहुत मुश्किल से कटवाता है। जब खाने के लिए बिल्कुल बंद कर दूंगी ना कोई भी।

00:11:54 Speaker 4

सब मना कर देंगे खाना नहीं मिलेगा जब नेल्स पर।

00:11:57 Speaker 1

तब वो बैठ जाते हैं, मतलब ऐसा सुन के कि वो तब भी बैठने में तकलीफ करते हैं।

#### 00:12:01 Speaker 4

नहीं रो होगा रोते रोते कटवाता है सारे नेल्सा

#### 00:12:04 Speaker 1

अच्छा जी अगला है। बारहवां प्रश्न अपने बच्चों की आलोचना करने से बचते हुए केवल उसकी प्रगति पर ध्यान देने।

#### 00:12:13 Speaker 1

मैं आपको कौन कौन सी कठिनाइयों का सामना करना पड़ता है? कई बार आपको भी फ्रस्ट्रेशन हो जाती होगी। कई बार आपको भी गुस्सा आ जाता होगा। बच्चों के ऊपर तो उस टाइम पे अपने आप को कंट्रोल करना है, है ना की भाई? बच्चों को इस तरह से बेहेवियर नहीं होगा मुझे।

#### 00:12:26 Speaker 2

तो भैया बहुत गुस्सा आ जाता है। 7 साल हो रहे।

#### 00:12:29 Speaker 1

है।

#### 00:12:29 Speaker 2

करतेकरते हॉस्पिटल दौड़ना आना, घर को भी देखना और भी बच्चों को भी देखना, इनको भी देखना बहुत मैं परेशान हो गई तो मैं पिटाई भी करने लगती। जब मुझे गुस्सा आ जाता। बहुत ज्यादा यही प्रॉब्लम है इसके साथ।

#### 00:12:45 Speaker 1

आप कभी सेम इसी तरफ है।

#### 00:12:49 Speaker 1

अपने बच्चों की छोटी छोटी सफलता है। कई बार आपने कुछ काम कराया, छोटा छोटा काम उसने कर लिया है ना सक्सेसफुल्ली कर लिया तो उसको बारबार ऐसा मोटिवेशन देने के लिए कि बेटा वेरी गुड करके बहुत अच्छा काम किया है ना? और इसमें कोई प्रॉब्लम? आप लोगों को सामना करना पड़ता होगा।

#### 00:13:04 Speaker 2

नहीं जैसे मैं किचन में हूँ, बेटा।

#### 00:13:07 Speaker 2

बोटल ले आओ, पानी की या प्लेट उठाकर ले आओ तो ले आएगा फौरन में छाबासी देती हूँ मतलब तो खुश हो जाता है और अच्छा हाँ, अच्छा करता है काम।



00:13:18 Speaker 4

हमारे वाला तो बिल्कुल मतलब की बात तो बहुत अच्छे से समझता है।

00:13:23 Speaker 4

अगर हमने कह दिया कि खाने का मतलब कि दस्ता काम लगना है तो पूरा दस्ता काम भी लगाएगा। कंप्यूटर सब चीज करेगा और फिर उठाकर भी चीजों को लेकर किचन में ही रखेगा। मगर उसे शाबाशी देओ या वो करो इतना वो उसे वो नहीं है मगर मैं कहती हूँ बेटा बहुत अच्छा काम कर रहा है तो?

00:13:41 Speaker 4

मम्मा बोतल भी पूरी भर के रखेगा। फिर जल्दी से मम्मा बर्तन धो दूँ। मैंने कहा चलो दो बार मतलब की गिलास सफाई करवा देती हूँ, मैंने कहा करो।

00:13:51 Speaker 1

तो मतलब इसमें कोई प्रॉब्लम वैसे नहीं आती?

00:13:53 Speaker 4

नहीं आती जा।

00:13:54 Speaker 1

अच्छा अपने बच्चों की असफलता के बाद कई बार उन्होंने किया बट सक्सेसफुल नहीं हो पाया, ठीक है।

00:14:00 Speaker 1

उसके बाद नए कार्य देने में क्योंकि आपको भी डर लगे कि अब अगला कार्य दूर कर पाएगा, नहीं कर पाएगा। अभी तो ये नहीं कर पाया है ना तो उस टाइम में आपको कौनकौन सी कठिनाइयों का सामना करना पड़ता है?

00:14:10 Speaker 2

कठिनाई का मतलब जो कोई जैसे काम दूसरा बताती हूँ तो समझ में नहीं आता उसको जल्दी करने के लिए तैयार नहीं होता। बारबार बोलती हूँ।

00:14:20 Speaker 1

खासकर अभी जब उसको सफलता मिली है उस काम में आपने दूसरा काम दे दिया कि चलो अब तुम ये करो, लेकिन उसमें भी फिर आपको।

00:14:26 Speaker 2

जी बहुत मुसीबत हो जाती है थोड़ा।

00:14:30 Speaker 4

नहीं, वो तो कहेगा मम्मा, ज़रा सीखा दो मुझे

00:14:33 Speaker 1

अच्छा

00:14:33 Speaker 4

सिखाओ तो मैं कर लूँगा

00:14:36 Speaker 3

अच्छा

00:14:36 Speaker 1

भले ही

00:14:37 Speaker 1

इन्हें काम नहीं करने के बाद दूसरा काम फिर बोलता है कि नहीं मेरे को सिखाओ तो मैं हाँ

00:14:40 Speaker 4

सिखाओ

00:14:41 Speaker 3

अच्छा

00:14:42 Speaker 4

कैसे करना है मामा सिखाओ

00:14:43 Speaker 3

ठीक है

00:14:45 Speaker 1

उसके बाद केश्वन नंबर 15 है। हमारा अपने बच्चों के लिए धैर्य और सकारात्मक का उदाहरण बनने में आपको कौनकौन सी कठिनाइयों का सामना करना पड़ता है?

00:14:55 Speaker 1

इसका मतलब यह है कि जैसे कई बार आप धैर्य का प्रतीत दिखाते हैं, जैसे अभी आपने बताया की आप फ्रस्ट्रेट हो जाती हैं, है ना? बट? कई बार अंदर तक काफी कुछ रखकर हमने गुस्सा नहीं शो किया। राइट बच्चे को शो किया की भाई देखो जब भी ऐसा

मुसीबत आए तो पॉजिटिव कैसे रहना है? किस तरीके से आपको गुस्सा नहीं आना चाहिए? राइट तो इन सब में कौन कौन सी कोई प्रॉब्लम आती होगी आपको?

00:15:17 Speaker 1

आपको तो गुस्सा

00:15:18 Speaker 3

आ जाता है।

00:15:19 Speaker 2

मुझे तो गुस्सा ही आता है मगर मैं गुस्सा बहुत वह करती हूँ मगर नहीं। मुझे जब गुस्सा आता है तो मुझे कुछ नहीं दिखता। इस बच्चे के साथ में मेहनत बहुत है। कितनी मेहनत करूँ?

00:15:30 Speaker 2

7 साल बीत चुके हैं, हॉस्पिटल भी जाना, फिर यहाँ भी आना। घर के काम भी सारे हैं, कितना लेट हो जाते हैं? सारे दिन स्कीम लगते।

00:15:39 Speaker 3

हैं। जी जी आप?

00:15:42 Speaker 4

इस प्रॉब्लम में तो कुछ नहीं।

00:15:45 Speaker 3

अच्छा।

00:15:46 Speaker 4

मतलब की ज्यादातर इन बच्चों को इस।

00:15:49 Speaker 4

गुस्सा गदा के दिलवाते हैं ना कि इनका हाथ उठ ही जाता है। नहीं।

00:15:54 Speaker 1

जब कंट्रोल नहीं हो पाता।

00:15:55 Speaker 4

नहीं हो पाता।

00:15:56 Speaker 2

मानते नहीं ना? किसी चीज़ को समझाओ तो उनको समझी ही नहीं आती।

00:16:00 Speaker 1

बिल्कुल बिल्कुल जी सोलहवां प्रश्न है, अपने बच्चों को उनकी भावनाओं पहचानने में दुख है तो दुखी हो सके, बता पाए कि मैं दुखी हूँ, भूख लग रही है या

00:16:09 Speaker 1

खुश है तो खुशी होके बता पाए गुस्सा आ रहा है अंदर या फिर किसी के लिए क्या नाम है? एकदम ईर्ष्या का भाव आ रहा है तो बता पाए कि मेरे को इससे जलन हो रही है। पसंद नहीं आ रहा है कुछ ऐसा है तो उसको आपको बताने में या पहचानने में।

00:16:20 Speaker 1

उसको पहचान कराने में कौनकौन सी प्रॉब्लम का सामना करना?

00:16:23 Speaker 2

बस अगर भूख लगी तो यूँ ही सर, अरे।

00:16:25 Speaker 1

बस खाने का बता पाएंगे बाकी कोई दूसरी चीज़।

00:16:27 Speaker 2

और कुछ नहीं बता पाता है।

00:16:29 Speaker 3

अच्छा।

00:16:29 Speaker 2

कुछ भी नहीं जैसे बस मम्मी पापा बोलता है उसके बारे में और कुछ नहीं बोलता है।

00:16:34 Speaker 3

अच्छा आप।

00:16:35 Speaker 4

हमारा वाला सारी चीज़ें बोलता है। वैसे तो खाने को भी।

00:16:39 Speaker 4

गुस्सा आया तो गुस्सा में तो बिल्कुल गुस्सा हो कर बैठ जाएगा। एक साथ बोलता ही नहीं है, फिर किसी से भी अगर इस किसी से मतलब की उसे लड़ाई करनी है या कुछ करना है तो।

00:16:53 Speaker 2

ये तो।

00:16:53 Speaker 4

है। अच्छा तो।

00:16:54 Speaker 1

मतलब?

00:16:55 Speaker 1

भावना नहीं पहचान नहीं पाता उतने तरीके से।

00:16:57 Speaker 4

मतलब ये जल्दी।

00:16:58 Speaker 1

से कई बार गुस्सा हो तो वो पहचान पा रहा है कि नहीं पहचान पा रहा है। कई बार ये भी होता।

00:17:01 Speaker 4

है, पहचान जाता है वो नहीं।

00:17:02 Speaker 2

ये नहीं।

00:17:03 Speaker 4

पहचान पाता।

00:17:03 Speaker 3

अच्छा।

00:17:04 Speaker 4

वो तो पहचान जाता है। अगर मैं गुस्से होंगे तो कहेगा मम्मा क्यों हो रही हो मुझसे गुस्सा मैंने क्या किया है?

00:17:10 Speaker 3

अच्छा अच्छा अच्छा

00:17:11 Speaker 4

मैंने करा क्या है कि बार बार यही वर्ड पूछे चला जाएगा

00:17:15 Speaker 3

अच्छा, अच्छा, अच्छा अच्छा

00:17:18 Speaker 1

अच्छा सेवेंटीथ है जैसे कई बार बच्चों को भी फ्रस्ट्रेशन हो जा रहा है या कई बार गुस्सा हो जाता है। कई बार रोना हो रहा है राइट तो वो अपनी भावनाओं को अच्छे तरीके से व्यक्त कर पाए। अब जैसे आपका बच्चा तो मार ही देता है, पिट ही देता है राइट

00:17:29 Speaker 1

तो वो सही तरीके से व्यक्त नहीं कर पा रहा है। अक्चवली उसके अंदर फ्रस्ट्रेशन कहीं ना कहीं आ रही होगी। बट वो बता नहीं पा रहा। अब नहीं बता पा रहा तो उसके लिए वो हाथ यूज कर ले रहा है राइट तो इस टाइम में उसको सही तरीके से प्रोत्साहित करने में की बेटा ऐसा नहीं करना है वो काम वहाँ पे क्या क्या प्रोब्लम्स आपको सामना करना पड़ रहा है?

00:17:44 Speaker 2

मैं बस ये

00:17:46 Speaker 2

कहती हूँ कि बेटा ऐसे नहीं करते, बड़ों को नहीं मारते। मतलब बस थोड़ी देर सुनेंगे मगर समझ में नहीं आता मुझे करना उन्हें वही काम है मारना हाथ चलाना मतलब ये करना।

00:17:58 Speaker 1

अपने को जैसे थूक भी रहा है तो उसका

00:17:59 Speaker 2

मतलब जी यही तो मैं समझाती, बहुत हूँ मगर समझ में नहीं आता।

00:18:03 Speaker 3

जी जी आपा

00:18:05 Speaker 4

उसे तो ये प्रॉब्लम नहीं है।

00:18:07 Speaker 3

अच्छा

00:18:08 Speaker 4

मतलब की ज्यादातर कोई गुस्सा है या कुछ है तो वो बोलते ही नहीं है। अच्छा अलग जाकर बैठ जाएगा।

00:18:15 Speaker 1

ये बताना जरूरी है ना?

00:18:16 Speaker 4

हाँ

00:18:16 Speaker 1

वो

00:18:17 Speaker 4

बताता नहीं है।

00:18:18 Speaker 1

वो

00:18:18 Speaker 4

बताता नहीं है यही।

00:18:19 Speaker 1

तो प्रॉब्लम है।

00:18:20 Speaker 4

हाँ

00:18:20 Speaker 1

बताता नहीं है तो प्रॉब्लम है।

00:18:21 Speaker 4

हाँ

00:18:21 Speaker 1

बच्चा है तो फिर उसको बताना जरूरी है ना बगल में आके बताया कि भाई मेरे को ऐसा।

00:18:25 Speaker 1

गुस्सा आ रहा है या मेरे को?

00:18:26 Speaker 4

नहीं, वो नहीं बताता।

00:18:27 Speaker 1

हाँ, नहीं तो वो।

00:18:28 Speaker 4

रोना आया तो बस रोता रहेगा। क्यों रो रहे हो? मुझे बस ये हो रहा है मम्मा इससे गुस्सा हो रहा हूँ, कैसे बता देगा?

00:18:37 Speaker 3

अच्छा।

00:18:38 Speaker 4

हाँ या इन्होंने मारा है या कुछ करा है ये चेज?

00:18:41 Speaker 1

करना बहुत जरूरी है। अगर नहीं बताएंगे तो वो भी अंदर कहीं पे हट रहा है।

00:18:45 Speaker 1

तो वो भी घुट रहा है तो कहीं ना कहीं वो ऐसे एक्शन में आ जाएगा कि हाथ पैर चलाएगा या फिर थूकना स्टार्ट कर देगा या फिर कुछ इस तरह से कुछ भी कर सकता है? वो बच्चे को गुस्सा मतलब?

00:18:51 Speaker 4

कि।

00:18:51 Speaker 1

कंट्रोल नहीं होगा।

00:18:53 Speaker 4

उसके साथ ये है ना कि मारेंगे या कुछ करेंगे तो जो होगा वो होगा, मैं पूछूंगी कि क्या हुआ है तो बता देगा कि मार रहा है या कुछ भी प्रोग्राम है वो बता देता है।

00:19:04 Speaker 4



जब हमारे समझ में नहीं आएगा तो वो बिल्कुल इशारा करके सब चीज जब तक नहीं बता देगा, जब तक पीछे ही पड़ा रह रहा।

00:19:11 Speaker 3

है अच्छा ठीक है।

00:19:13 Speaker 1

जब आपका बच्चा कोई हीन भावना का संभव कर रहा है, अनुभव कर रहा है कोई मतलब एक दम से डाउन है, दुखी है, परेशान है या कोई चिंता उसको हो रही है तब आपको?

00:19:23 Speaker 1

कठनाई का कौनकौन सी कठनाई का सामना करना पड़ता है।

00:19:25 Speaker 4

चीज तो उन्हें पता है मालूम नहीं होती।

00:19:28 Speaker 1

है ना वही चीज हाँ।

00:19:30 Speaker 2

उसे भी नहीं पता होता कि मेरे क्या हो रहा है? फीवर हो रहा है जब तबियत खराब हो रही कहाँ इतनी उनको समझ?

00:19:37 Speaker 4

है। बस जब तबियत खराब होती है, कुछ होगा तो मम्मा चलो डॉक्टर की।

00:19:42 Speaker 2

नहीं वो।

00:19:43 Speaker 4

नहीं बोल पाता।

00:19:44 Speaker 3

कुछ।

00:19:44 Speaker 1

नहीं।

00:19:45 Speaker 2

नहीं, खुशी में नहीं।

00:19:47 Speaker 3

ठीक है, हाँ।

00:19:48 Speaker 1

उन्नीसवां प्रश्न है जब आपके बच्चों को कोई चीजें सामने हो गई जैसे दुखी हो गया, परेशान हो गया उस टाइम में कुछ है ना? हमारे पास कुछ रणनीतियां होती हैं। जैसे सांस लेना दुखी हो जाओ तो फिर एक लंबी, लंबी, गहरी सांस लेना बोलते हम लोग है ना?

00:20:02 Speaker 1

या कभी गुस्सा आ रहा हो तो फिर किसी से रुक कर थोड़ी देर के लिए उस जगह से हट जाओ और लंबी लंबी सांसे लो। ये बहुत सारे रणनीतियां हमारी बनी होती है तो ये सब चीजें सिखाने में कभी कोई प्रॉब्लम आई हो आप लोगों को? क्योंकि आप लोग से ऊपर वाले केश्वन में कह रहे हैं की वो पहचान ही नहीं पा रहा तो ऐसी रणनीति आप लोगों ने मुझे लगता नहीं आप लोगों ने सिखाई होगी।

00:20:19 Speaker 2

नहीं।

00:20:19 Speaker 1

है ना ऐसा कुछ नहीं सीखा ठीक?

00:20:21 Speaker 4

है सर पता ही नहीं।

00:20:22 Speaker 2

चलता हाँ तो अभी तक जब पता ही नहीं इतनी समझ नहीं है तो कहाँ से।

00:20:27 Speaker 1

जी जी ठीक है बीसवां प्रश्न है जब आपका बच्चा निराश होता है तब उसकी भावनाओं को मान्यता देने में आपको कौन कौन सी कठिनाइयों का सामना करना पड़ता है? जब कभी वो निराश हुआ है ना दुखी हो गया है?

00:20:39 Speaker 1

तब आप उसको एक्सेप्ट कर रहे हो? चलो कोई बात नहीं। इस बात के लिए दुखी होना जायज है तो उस चीज को समझाने के लिए कभी कभी आपको कुछ प्रॉब्लम आई हो?

00:20:47 Speaker 2

अब इतनी तो उनको समझ नहीं है, बस बैठ जाते बस मैं नहीं बैठा ऐसे नहीं बस इतना समझ है ही नहीं जो निराश होकर बैठे या कुछ।

00:20:58 Speaker 3

अच्छा।

00:20:58 Speaker 2

मतलब तो सेम ही रहता।

00:21:00 Speaker 4

है मतलब की गुस्सा भी आएगा या कुछ होगा तो 1 मिनट में उसका पता ही नहीं चलता। किसने गुस्सा हो रहा है या कुछ हो रहा है।

00:21:09 Speaker 3

ठीक ठीक है।

00:21:10 Speaker 1

अगला है इक्कीसवां जब आपके बच्चों में सकारात्मक छवि बनानी हो।

00:21:15 Speaker 1

है ना? यानी उसको कॉन्फिडेंस दिलाना हो कि भाई तू ये कर सकता है राइट? उसमें कई बार आपको कठिनाई का सामना करना पड़ेगा, क्योंकि आप समझा तो रहे हैं क्या? बच्चा समझ भी आया कि नहीं समझ रहा तो कई बार प्रॉब्लम उसमें भी हमें देखने को मिलती है तो आपको कुछ ऐसा प्रॉब्लम देखने को मिलता होगा।

00:21:28 Speaker 2

बार बार समझाती हूँ मगर बस ज़रा देर समझेगा फिर वही।

00:21:34 Speaker 1

थोड़ी देर के लिए समझता।

00:21:35 Speaker 2

है समझता नहीं है।

00:21:37 Speaker 1

हाँ, फिर आपके में।

00:21:38 Speaker 4

ये तो समझ तो जायेगा जल्दी से मगर फिर इतनी जल्दी भूल भी जाता है इन चीजों को।

00:21:43 Speaker 3

सेम चीज़ मतलब।

00:21:44 Speaker 4

हाँ मतलब कि वो आदमियों से भूलने में उनकी बातें करने में उसमें ज्यादा इन्ट्रेस्ट है और खाने में उसमें इन चीजों में इन्ट्रेस्ट नहीं हो सकता।

00:21:55 Speaker 3

ठीक है।

00:21:57 Speaker 1

अगला क्वेश्चन है बाईसवां प्रश्न मेरा अपने बच्चों को उसकी क्षमता पहचानने या शक्ति पहचानने में है ना की वो अपनी स्ट्रेंथ को जाने की? अच्छा ये चीज़ तो वो कर सकता है, है ना? जैसे पानी पीना है तो बोतल उठाया तुरंत ही पी गया तो हमारी क्षमता होती है हमें पता है की हम भी कर सकते हैं। इसके लिए हमें सपोर्ट की जरूरत नहीं है।

00:22:14 Speaker 1

भाई तो ऐसी क्षमता पहचानने में क्योंकि कोई नया टास्क वो सीखा है आप उसको बता रहे हो बेटा ये तब तो कर सकता है उसको अकेले भी कर ले, चाहे जूता पहनना हो या कपड़ा पहनो, कुछ भी चीज़ हो सकती है तो उसमें पहचानने में अगर कोई कठिनाई का सामना करना पड़ता हो उसे समझाने में।

00:22:26 Speaker 2

पानी है तो यूं करेगा इशारा होटल अगर सामने रख के तो उठा के पी लेगा।

00:22:31 Speaker 1

नहीं तो एग्जैम्पल दिया था, ऐसे कोई कोई काम कर रहा हो, आपको लगा की नया काम है। सीखा दिया अब उसको समझा रहे हो की नहीं बेटा ये काम तू कर सकता है। हाँ तेरी क्षमता है।

00:22:39 Speaker 2

जैसे कच्चा पहने कभी तो उल्टा पहन लेंगे, कभी सीधा पहन लेंगे, कभी पहन लिया, कभी नहीं भी पहन पाते।

00:22:46 Speaker 1

बोलने से कर लेते हैं, मान लेते हैं, नहीं समझ पाते हैं।

00:22:49 Speaker 2

नहीं नहीं समझने में टाइम लगता है, समझ नहीं पाते ज्यादा।

00:22:52 Speaker 1

टाइम लगता।

00:22:53 Speaker 4

है वो तो मतलब कि बोतल से भी पानी अपने आप लेकर ही पीता है। कपड़े भी आजकल अपने आप ही पहन रहा है।

00:23:00 Speaker 3

अच्छा।

00:23:01 Speaker 4

मगर सीखाना तो पड़ा है।

00:23:03 Speaker 3

अच्छा अच्छा।

00:23:05 Speaker 1

अपने बच्चों को कई बार नकारात्मक नाम से बुलाते हैं। अड़ोस पड़ोस के लोग या फिर बच्चे दूसरे बच्चे है ना उससे बचाना बहुत मुश्किल हो जाता है। ऐसे शब्दों का इस्तेमाल तो होता ही है इस टाइम में। फिर जब बच्चों को किस तरह समझाया जाए की बेटा अगर कोई ऐसा बोल रहा है तो आपको क्या करना चाहिए? आपने कभी सिखाया बच्चों को इस तरीके से?

00:23:23 Speaker 2

जैसे कोई आवाज लगा रहा है बच्चे इसको तो कहेगा मतलब वो बुला रहा है, ऐसा ऐसा बताएगा। अगर समझ में आ गई तो?

00:23:32 Speaker 1

नहीं तो एक बार गलत नाम से ही बुलाते हैं ना बच्चे फिर छोटे बच्चे हैं, अब उनको भी पता नहीं है तो?

00:23:36 Speaker 2

नहीं फिर समझता है, हाँ।

00:23:38 Speaker 1

तो उनको समझ नहीं आता है।

00:23:40 Speaker 1

आप कभी समझाने की कोशिश नहीं की? मतलब इस तरीके से अगर कोई बच्चा बोले तो कितना?

00:23:43 Speaker 2

सर समझाऊं कहाँ तक समझाऊं? कभी समझा दिया कभी नहीं।

00:23:49 Speaker 1

कभी समझाया तो मतलब कुछ समस्या का आया मतलब?

00:23:51 Speaker 2

नहीं।

00:23:51 Speaker 1

नहीं समझ पाया होगा वो समझा

00:23:53 Speaker 4

तो जाता हमारा वाला उल्टा नहीं कह रहा वो जैसे उल्टा वो बोल रहा है ना उल्टा ही जवाब

00:23:59 Speaker 4

उनके लिए ही मिल जाएगा।

00:24:00 Speaker 1

अच्छा मतलब उनको जवाब देकर आते हैं।

00:24:01 Speaker 4

जवाब देकर आता है।

00:24:03 Speaker 3

अच्छा।

00:24:03 Speaker 4

जैसे वो उस नाम से बुलाएंगे ना? उन्होंने वही नाम से बोला।

00:24:07 Speaker 1

आपने कभी लेकिन सिखाया है इस टाइम पे बच्चों को क्या करना चाहिए, कैसे करना चाहिए?

00:24:10 Speaker 2

मैं हटा ही लेती हूँ उधर से मैं।

00:24:12 Speaker 1

ना?

00:24:13 Speaker 1

तो फिर आपने बच्चों को ये तो बताया होगा ना की अगर ऐसा कोई बुला रहा है, गलत नाम से बुला रहा है तो आप फट जाए वहाँ से ये तो आपने बोला ही होगा आपके बच्चे वो उस टाइम पे वो करते हैं टाइप में या फिर उनको भी ना वापस सुन सुना के नहीं आते

00:24:25 Speaker 4

सुना कर ही आए वो

00:24:26 Speaker 1

अच्छा सुना के बिना

00:24:27 Speaker 4

मतलब के, बिना सुनाए वो हटाएगा नहीं?

00:24:29 Speaker 3

अच्छा

00:24:29 Speaker 1

जी जी मेरा चौबीसवां प्रश्न है अपने बच्चों को स्कूल?

00:24:33 Speaker 1

के लिए या समाज में इन्क्लूजन के लिए मतलब साथ में बैठा के खिलाने के लिए दूसरे बच्चों के साथ सभी बच्चों के साथ राइट। इसमें आपको कौन कौन सी मुसीबतों का सामना करना पड़ता?

00:24:44 Speaker 2

है। सबके साथ में तो खुशी से बैठ जाता है।

00:24:47 Speaker 1

सब सारे बच्चों के साथ इन्वॉल्व होता है। सभी बच्चों का कोई ऐसा नहीं है जो उसके साथ इन्वॉल्व नहीं।

00:24:50 Speaker 2

होता नहीं, नहीं बस बैठ जाएगा थोड़ा।

00:24:53 Speaker 2

मतलब छेड़ाछाड़ कहीं मार दिया, कहीं नोच लिया ये आदत है बैठ तो सब में जाएगा अगर थोड़ा शरारता

00:25:02 Speaker 1

बैठना मतलब भाई उठना, बैठना, खाना पीना, एन्जॉय करना खेलना हाँ।

00:25:06 Speaker 2

हाँ, शरारत करने लगते हैं।

00:25:08 Speaker 1

अच्छा थोड़ा शरारत करो।

00:25:10 Speaker 4

हैं जी तो कभी नहीं।

00:25:12 Speaker 4

सबके साथ बैठेगा भी, शादी में जाएंगे जैसे शादी में सबके साथ रहेगा अपनी नानी खला सब रिश्तेदारता सबको जानता भी है। सबके साथ रहना, खाना सब कुछ कराएगा। बस उसकी सहारा है कि मारना है तो मारना है। अगर चुपचाप बैठना है तो वहाँ पर वैसे बाहर जाकर भी इतनी शरारत नहीं करता।

00:25:32 Speaker 3

अच्छा ठीक है।

00:25:34 Speaker 4

ध्यान नहीं ज्यादा छेड़खानी करता है बाहर नहीं करता।

00:25:36 Speaker 1

नहीं फिर अक्चवली सभी लोगों के साथ इन्वॉल्वमेंट करते वक्त भी कई बार आपको प्रॉब्लम होती होगी, सामने वाले साइड से भी या फिर अपने साइड से भी।

00:25:42 Speaker 4

नहीं, नहीं।

00:25:43 Speaker 1

कोई ऐसा प्रॉब्लम नहीं है, ठीक है, अपने बच्चों को खुद के लिए बोलने में।

00:25:48 Speaker 1

ठीक है। जैसे कुछ प्रोब्लम्स आती है तो खुद के लिए भी बोलना होता है की ये पानी की बॉटल मेरी है या कुछ भी चीज़ हो सकती है। लाइक ऐसे बोलने में की उनके जरूरत सिखाने में आपको कोई भी कठिनाई का सामना करना पड़ता हो। सपोज़ ऐसे हमारी मेट्रो में सीट्स है। डिसेबिलिटी बच्चों की तो बैठ सकते हैं की नहीं, ये मेरी सीट है बोलकर ऐसा मतलब कुछ होता हो।



00:26:06 Speaker 1

इस टाइम में आपको कोई समस्या का सामना करना पड़ेगा।

00:26:08 Speaker 4

नहीं करना पड़ा ना?

00:26:10 Speaker 2

उनको तो इतनी समझी नहीं है। कहती तो हूँ मगर वो समझते।

00:26:14 Speaker 1

ठीक है तो अभी मतलब अपने लिए उतना कुछ नहीं बोल पाते कि ये सही है मेरे लिए नहीं मेरे लिए।

00:26:19 Speaker 2

ऐसा ठीक नहीं है।

00:26:20 Speaker 3

ठीक है।

00:26:21 Speaker 1

छब्बीसवां प्रश्न एक सुरक्षित और सहयोगी घर।

00:26:24 Speaker 1

का वातावरण बनाने में आपको कौन कौन सी समस्या का सामना करना पड़ता है। यानी बच्चों के लिए अच्छा सा माहौल घर में बनाए रखने के लिए जहाँ पे सुख शांति हमेशा रहे ऐसा बनाने में कई बार समस्या का सामना करना पड़ता है और ये में से कई बार फ्रस्टेशन हो गया है। ना तो वो थोड़ा सा डाउन हो गया, बट वैसा नहीं होना चाहिए। बट हो जाता है ऑफ कोर्स सबका घर है ना?

00:26:43 Speaker 1

तो उस टाइम में आपको कौनकौन सी समस्याओं का सामना करना पड़ता है?

00:26:46 Speaker 2

अब घर में तो इतनी शांति नहीं रहती है सर।

00:26:49 Speaker 1

बिल्कुल, बच्चे।

00:26:50 Speaker 2

है।

00:26:50 Speaker 1

सर, वही चीज़ है।

00:26:52 Speaker 2

शांति नहीं रह सकती। चिल्लाना, चीखना इनके साथ तो सब कुछ करना ही पड़ता है।

00:26:58 Speaker 3

जी जी आपके।

00:26:59 Speaker 4

सेम है।

00:27:00 Speaker 3

अच्छा।

00:27:00 Speaker 4

नहीं रह सकते शांति।

00:27:04 Speaker 1

अच्छा सत्ताईसवां प्रश्न है अपने बच्चों की जरूरतों को शिक्षकों या देखभाल करने वाले तक पहुंचाने के लिए कौन कौन सी घटनाओं का सामना करना पड़ता है? यानी कि जैसे आपके बच्चे स्कूल आ रहे हैं ठीक है तो यहाँ पर उनको

00:27:19 Speaker 1

देखभाल करने वाले जो टीचर वगैरा हैं, ठीक है वहाँ तक पहुंचाने के लिए आपको कौनकौन सी समस्याओं का सामना करना पड़ता है उनको समझाने के लिए?

00:27:27 Speaker 2

अब समस्या का अब देखो हम लोग घर से आये सारे काम छोड़कर बच्चे यहाँ छोड़कर आये कभी यहीं बैठी रहती है मैं कहती अब पहुँच जाए वापस अब वही है फिर इन्हें लेके जाती हूँ।

00:27:39 Speaker 2

मैं फिर सारा घर का काम अब इतनी इनको समझ नहीं है जो अकेले आ जाएं, चले जाएं। अब सारी जिंदगी इनके साथ तो बस ऐसे ही करना पड़ेगा।

00:27:49 Speaker 1

आपका।

00:27:50 Speaker 4

इन्हें तो मतलब कि स्कूल आने में तो ये जो वो है, अगर दिल होगा, स्कूल के लिए तो सुबह ही उठेंगे।

00:27:58 Speaker 4

प्रेस भी होंगे नहाना धोना अपने आप करता है सब काम।

00:28:01 Speaker 3

अच्छा।

00:28:01 Speaker 4

और अगर नहीं होना है नहीं जाना है, मुझे तो चाहे आप कुछ भी कर लो उसके साथ नहीं करना है, तो नहीं करना है।

00:28:10 Speaker 1

अच्छा लेकिन ये सब इसकी जो जरूरतें हैं वो सब टीचर को समझाने में कई बार आपको उसका समस्या का सामना करना पड़ता होगा।

00:28:16 Speaker 1

आप अच्छे से एक्सप्लेन कर पाते हो कि नहीं? बेटा मतलब ये टीचर से ये मेरे बच्चों को ये प्रॉब्लम आ रही है।

00:28:21 Speaker 4

मैंने कि बहुत बार टीचर से बताया है, वो भी बताया है। टीचर भी कह रही थी कि मार बहुत रहा है।

00:28:28 Speaker 1

अच्छा आज।

00:28:29 Speaker 4

कंप्लेंट हुई है अच्छा।

00:28:30 Speaker 1

समझ में उनको भी फिर सही तरीके से नहीं आ पा रहा है।

00:28:33 Speaker 2

जी।

00:28:34 Speaker 1

ठीक है, अट्टाईसवां प्रश्न है हमारा।

00:28:36 Speaker 1

अपने बच्चों को घर के छोटे कार्यों में शामिल करने में कोई समस्या का सामना करना पड़ता हो छोटे छोटे काम में अगर कुछ

00:28:44 Speaker 2

छोटे छोटे काम में तो ऐसा नहीं जैसे कोई चीज़ सामने है। बेटा बोतल उठा दो या कुछ और? अगर मर्जी हुई तो उठा दी नहीं तो नहीं नहीं चिल्लाते।

00:28:55 Speaker 1

रह?

00:28:55 Speaker 2

जाओ।

00:28:58 Speaker 4

अपने आप पूरे तकलीफ जैसे हम कहीं और बिस्तर भी करेंगे अपने आप ले जाएगा बिस्तर सब चीज़ उठाना दिखाना सब कुछ अपने आप करना।

00:29:08 Speaker 3

ठीक है।

00:29:10 Speaker 1

आपने तो बताया जैसे आपके घर पे एक शांति वाला परिवार मतलब इन्जैक्टली नहीं हो पाता है, नहीं तो वो।

00:29:16 Speaker 1

मैं ना सहयोग करने में बहुत सारी समस्याओं का सामना तो करना पड़ता ही है। आप लोगों को अगला प्रश्न है, तीसवां अपने बच्चों के लिए चिकित्सा या विकासात्मक सहायता प्राप्त करने में कौन कौन सी बाधाओं का सामना करना पड़ता है यानी की जैसे यहाँ पे आप लेके आये तो यहाँ पे आपको मेडिकल के लिए हो या फिर आप किसी डॉक्टर को दिखा रहे हैं।

00:29:34 Speaker 1

या फिर आपको ये थेरेपी बगैरह बच्चों को दे रहे हैं? आप लोग को दे ही रहे होंगे बहुत सारे थेरेपी उस टाइम पे आपको कुछ बहुत सारी प्रॉब्लम का सामना करना पड़ता होगा हो सकता है।

00:29:41 Speaker 4

पूरा दिन लगता।

00:29:42 Speaker 1

है। पूरा दिन लग जाता है, कॉस्ट भी आई थिंक आजाता होगा। कुछ आपको महंगा मिलेंगे।

00:29:47 Speaker 2

महंगा भी देखो इतनी आजकल इतनी महंगाई, इतनी कमाई भी नहीं अब हम लोग कैसे करते हैं इन बच्चों के साथ?

00:29:54 Speaker 2

हॉस्पिटल भी दिखाना, खेती भी करवाना।

00:29:57 Speaker 1

टाइम भी बहुत ज्यादा है।

00:29:58 Speaker 2

टाइम भी बहुत ज्यादा है। पूरा दिन समझ लो कि पूरा बर्बाद है। अब क्या बताएं अल्लाह ने ऊपर वाले ने दिया है तो अब हम लोग क्या कर सकते हैं इन बच्चों के साथ?

00:30:08 Speaker 3

ठीक है।

00:30:08 Speaker 1

आखिरी प्रश्न जो मेरा है।

00:30:10 Speaker 1

इन चुनौतियों से निपटने के लिए जितनी भी आपने चुनौतियां देखीं, बहुत सारी हमने बात की 30 चुनौती भी बात की। इन चुनौतियों से निपटने के लिए किसी प्रकार की कोई मदद जैसे या मैंने आपको मॉड्यूल के बारे में बताया कि ऐसा कुछ बन जाए कि क्या क्या की जैसे बच्चा थूक रहा है, घर पे है ना? या फिर नहीं बैठ पा रहा या फ्रस्ट्रेशन हो जा रहा है? आपको भी कई बार फ्रस्ट्रेशन हो जा रहा है?

00:30:29 Speaker 1

तो इन सब चीजों से कैसे निपटारा? मैंने दो तीन एग्जैम्पल भी दिए कैसे लंबी सांसें लेनी है, क्या करना चाहिए राइट? तो इसके लिए क्या ऐसा मॉड्यूल बन जाना चाहिए? क्या आपको लगता है ऐसा कुछ होना चाहिए? कुछ आपको निपटने के लिए इन चुनौती से कोई चीजें होनी चाहिए आपके पास अवेलेबल।

00:30:43 Speaker 2

अब क्या लगता? मुझे तो नहीं लगता कि ऐसा कुछ होगा जब बच्चा ही ऐसा है?

00:30:49 Speaker 1

नहीं फिर उस टाइम पे क्या करना चाहिए? उसके लिए तो जैसे मॉड्यूल बन सकता है जीस तरह से है ना कोई मुसीबत आ जाए जैसे बच्चे को कि भाई जैसे ठोक रहा है हाँ तो उसको कैसे रुकवाना है?

00:30:58 Speaker 2

अब रुकना रुकवाना, क्या बस मना ही कर सकती हूँ?

00:31:01 Speaker 1

वो आपको लग रहा है, मना कर सकते हैं। बट ऐसी बहुत सारी स्ट्रेटेजीज हो सकती है जिससे हम लोग रुकवा सकते हैं।

00:31:06 Speaker 1

क्योंकि हम लोग तो वही बताये, 10 इयर्स से है आप पेरेंट्स है आपने वो नहीं देखा है क्योंकि ये तो नॉर्मल है। आपका बच्चा कोई पहला नहीं है। दुनिया में जो थूक रहा है, बहुत सारे बच्चे थूकते है, हाँ जी बहुत सारे थूकते है और हम लोग पढ़ाते वक्त भी हमारे ऊपर भी थूक जाते है। कई बार बहुत सारी चीज हमने देखी है।

00:31:20 Speaker 2

जी।

00:31:21 Speaker 1

उस टाइम पे कुछ ऐसा क्या किया था कि बच्चा वो थूक धीरे धीरे रुके ठीक है तो वो।

00:31:26 Speaker 1

बहुत सारी स्ट्रेटेजीज हैं।

00:31:27 Speaker 2

क्या जैसे उसने थूका और मैंने डांटा तो थोड़ा अगर समझ में आया तो रुक गए और फिर भूल गए। फिर वही काम करने लगे। फिर मैंने समझा दिया या डांट दिया बस ये है।

00:31:38 Speaker 3

अच्छा।

00:31:39 Speaker 1

नहीं फिर ऐसा कुछ मॉड्यूल वगैरह कुछ होना चाहिए। ऐसा कुछ भी घर पे हम लोग बच्चों को देखकर।

00:31:43 Speaker 1

हाँ ना या फिर अपनी भी फ्रस्ट्रेशन भी थोड़ा सा डाउन कर सके की हमें मालूम चले की भाई एक थोड़ा सा पथ मिल जाता है एक रास्ता मिल जाता है थोड़ा सा और देखने के लिए तो आपको लगता है की ऐसी कोई जरूरत है।

00:31:52 Speaker 4

मैं तो ज्यादातर उसे इग्नोर करना हसन करती हूँ की नहीं देखूंगी तो ये काम भी एक करेगा।

00:31:59 Speaker 2

मतलब की।

00:31:59 Speaker 4

इसे ये दिखाकर ज्यादा करता है हमारा।

00:32:02 Speaker 2

हाँ दिखा के।

00:32:03 Speaker 4

ये।

00:32:03 Speaker 2

भी करता है।

00:32:04 Speaker 4

अगर वो देखते रहेंगे तो उसे मारता ही रहेगा, नोचता ही रहेगा। अगर मैंने नहीं देखा या वो हुआ की अब मैं देखूंगी नहीं, मैं जा रही हूँ तो वो कुछ भी नहीं करेंगे। इग्नोर करने में ज्यादा वो।

00:32:16 Speaker 1

नहीं मैं ये अक्ववली केशन मेरा ये था की मतलब जैसे ये देख लिए केशन्स मैंने पूछ लिए ठीक है?

00:32:21 Speaker 1

तो इसके आधार पर कुछ मैं अगर ऐसा बनाऊँ है ना जीस जो उससे पेंट्स को भी हेल्प हो पाए तो क्या आपको लगता है की ऐसी कोई जरूरत हो सकती है या ऐसा कुछ हो सकता है? क्या वाकई कुछ मतलब ठीक है? होना चाहिए ऐसा कुछ।

00:32:33 Speaker 4

इन बच्चों के नहीं स्पेशल मतलब की डॉक्टर के पास इतनी लंबी लाइनें न लगाएं ये।

00:32:40 Speaker 4

सबसे बड़ी बात है कि इन बच्चों में वो नहीं रहता।

00:32:44 Speaker 1

आप लोगों के लिए बात कर रहा हूँ मैं?

00:32:46 Speaker 4

और हमारा तो वो है कि घर के लिए तो कोई ना कोई इसके पास रहता ही है। ये काम ना करें या कोई इसके पापा रहेंगे, दादी रहेंगी या मैं रहूंगी कोई भी।

00:32:57 Speaker 4

रहता ही है।

00:32:58 Speaker 1

बट ऐसे कोई गाइड आपके पास अवेलेबल होनी चाहिए मतलब इस तरह से।

00:33:01 Speaker 4

होनी तो चाहिए।

00:33:02 Speaker 1

हाँ, मैं वही बोल रहा हूँ की ऐसे कुछ हो गया है सर यो।

00:33:04 Speaker 4

कहिए हमें।

00:33:05 Speaker 1

क्या?

00:33:06 Speaker 4

करना चाहिए।

00:33:06 Speaker 1

येस? मैं उसी पे पूछ रहा हूँ मैं और कुछ नहीं पूछ रहा हूँ इस वक्त आखिरी क्वेश्चन है मेरा इसीलिए की क्या ऐसी कोई जरूरत है कि हमें जरूरत नहीं है आपको क्या?

00:33:13 Speaker 3

लगता है।

00:33:14 Speaker 4



होने चाहिए

00:33:15 Speaker 3

जी

00:33:15 Speaker 4

ये हमें क्या करना चाहिए? मैं तो मोबाइल पर सर्च कर कर देखती रहती हूँ जी क्या करें क्या ना?

00:33:22 Speaker 1

करें जी क्योंकि मोबाइल पर सारी चीजें सही आपको नहीं मिलेंगे।

00:33:24 Speaker 4

नहीं पता चलता।

00:33:25 Speaker 1

है नहीं मान चल पाएगी और वो गलत इन्फॉर्मेशन फिर बहुत सारी पड़ी होती है तो फिर आप उसके चीज देखकर और गलत कर बैठेंगे तो बच्चे का दिक्कत हो जाएगा वही तो नहीं पता चलती है जी आपको क्या लगता है?

00:33:34 Speaker 2

यही लगता है मुझे भी बसा

00:33:36 Speaker 1

कि मतलब जरूरत होनी चाहिए कि नहीं अच्छा ठीक है, ठीक है, तो इसके साथ मैं आपका यह प्रश्न अंत अंत करना चाहूंगा ठीक है, धन्यवाद आप दोनों का

---

Audio file

Parents 3.m4a

Transcript

00:00:00 Speaker 1

ओके, मेरा नाम अनु श्रीवास्तव है आज मैं 16 तारीख को दो पेरेंट्स से बात करने जा रहा हूँ अपने चौथे साइकोसोशियल चैलेंजेस इंटरव्यू स्केड्यूल के ऊपर। सो सबसे पहला मैं आपसे आपका नाम जानना चाहूंगा।

00:00:18 Speaker 2

मेरा नाम रहमती खातून है जी।

00:00:21 Speaker 1

जी जी सर आपका।

00:00:23 Speaker 3

यूसुफ खाना

00:00:24 Speaker 1

यूसुफ खान जी आपका बच्चा मैम कितनी उम्र का है?

00:00:29 Speaker 2

मेरी बेटी 18 साल की है।

00:00:30 Speaker 1

18 साल की है, जो अभी बेटी को लेकर आ सकती है। हाँ।

00:00:34 Speaker 3

पोता मेरा है अब।

00:00:35 Speaker 1

रहा हाँ, हाँ।

00:00:36 Speaker 3

वो 8 साल का।

00:00:37 Speaker 1

है।

00:00:37 Speaker 1

8 साल का और इनकी मदर का नाम या फादर का नाम?

00:00:39 Speaker 3

नाहिद फातिमा।

00:00:40 Speaker 1

नाहिदा

00:00:40 Speaker 3

फादर का नाम जी और मुसुबा खान फादर का नामा

00:00:44 Speaker 1

फादर का नाम जी जी सो मैं आप लोगों से परमिशन लेना चाहूंगा इसको रिकॉर्ड करने के लिए क्या ये परमिशन ले सकता हूँ? मैं आपसे?

00:00:50 Speaker 2

जी जी कोई?

00:00:51 Speaker 1

भी आप बताइए

00:00:52 Speaker 3

जी बिलकुल ले लिया

00:00:53 Speaker 1

जी जी जी जी थैंक यू सरा

00:00:54 Speaker 1

सो मेरे पास ये कुछ 31 क्वेश्चन का क्रमांक है मेरे पास जिसमें से आपको जो भी प्रॉब्लम बच्चों के साथ सामना करना पड़ा, आप उसको खुल के मेरे को बताएगा, जैसे कि पहला है। अपने बच्चों को प्रतिदिन काम या पढ़ाई पूरी कराने में आपको कौन कौन सी कठिनाइयों का सामना करना पड़ता है? जी आप बताएं?

00:01:11 Speaker 2

पहले मेरी बेटी तो माशाअल्लाहा

00:01:13 Speaker 2

उसके उससे कोई मुझे कोई परेशानी नहीं है, सिर्फ वो चलने में मजबूर है। उसको लाना ले जाना यही बहुत मेरे लिए मुश्किल है।

00:01:21 Speaker 1

अच्छा जी हाँ

00:01:23 Speaker 3

जी अभी तो पढ़ नहीं रहा है। घर में देखभाल होती है।

00:01:27 Speaker 1

अच्छा

00:01:27 Speaker 3

और अब यहाँ से कोर्स बताया गया है कुछ यहाँ से

00:01:32 Speaker 3

तो वो इनकी मास्क को क्लर पहचान पाना ये क्लर है। ये है ये सब चीजें इस तरह की ये दी गई है जिसको प्रेपर करा के इनको इशाअल्लाह एक 2 दिन में बैठा ला जायेगा। 1020551030 मिनट।

00:01:44 Speaker 1

में।

00:01:45 Speaker 1

कुछ करते वक्त कुछ प्रोब्लम्स आती है कुछ दिक्कतें।

00:01:47 Speaker 3

आती है नहीं, कुछ नहीं थोड़ा आई कॉन्टैक्ट नहीं करता।

00:01:49 Speaker 1

आई कॉन्टैक्ट नहीं।

00:01:50 Speaker 3

करता और दिमाग दिमाग इधर उधर रहता है। इधरा

00:01:51 Speaker 1

उधर रहता है एक दम से खेलता हूँ एक जगह से।

00:01:54 Speaker 3

हाँ, कि एकदम से खेलने लगेगा। कहीं ये पानी पीने के पकड़ के लाओ तो अपने रूम में भाग जाता है। जी।

00:01:59 Speaker 1

जी जी ये सब जानना चाहता हूँ जी दूसरा प्रश्न है मेरा।

00:02:03 Speaker 1

जब आप अपने बच्चों की क्षमता के अनुसार उसके बच्चे की लेवल के अनुसार एज अनुसार जब आप कुछ लक्ष्य तय करते हैं तब आपको कोई घटनाएं का सामना करना पड़ता हो। कई बार आपको नहीं मालूम चल पाता। अच्छा इसके लक्ष्य के अनुसार ये कर पायेगा या नहीं कर पायेगा। कई बार ऐसा भी होता है राइट सो आप इसके बारे में क्या कहना चाहेंगे? नहीं।

00:02:19 Speaker 2

मुझे तो ऐसा भी।

00:02:21 Speaker 2

अभी तक कुछ ऐसा महसूस नहीं हुआ। कभी कभार वो आशा कभी कभार वो वैसा झलक आ जाता है।

00:02:27 Speaker 1

अच्छा ऐसे।

00:02:28 Speaker 2

वो माइंड से बहुत अच्छी है।

00:02:29 Speaker 1

अच्छा जैसे कभी कभार आपने बताया तो कभी कभार मतलब।

00:02:32 Speaker 2

कभी कभी वो जैसे ज़िद बहुत करने लगा।

00:02:34 Speaker 1

ज़िद करने लग जाती है। जी ठीक है, ठीक है।

00:02:37 Speaker 1

देन ज़िद से अगर आप डीलिंग कैसे करते हैं, क्या करते हैं आप ज़िद के लिए?

00:02:40 Speaker 2

नहीं, वो फिर बहुत जल्दी बात को समझ लेती।

00:02:42 Speaker 1

है। समझ जाती जी जी आप?

00:02:44 Speaker 3

जी ये दिमाग का बहुत तेज है। माशाअल्लाह मतलब ये आप समझ लीजिए हम फोर्थ फ्लोर पर रहते हैं। लिफ्ट अगर घर वाला या झीने से जाना है तो ये अपने ही फ्लोर पर अपने डोर के सामने रुकेगा।

00:02:57 Speaker 1

अच्छा जी।

00:02:57 Speaker 3

और जैसे हम कहीं बाजार ले जा रहे हैं वहाँ नीचे उतरता है ऑफलेट चॉकलेट लेने तो ये उसी दुकान पे जाएगा जीस दुकान से ये लेता है।

00:03:04 Speaker 1

नहीं, जब आपने कोई लक्ष्य तय कर रहे हैं जब पहली बार आपने इसको कोई काम दिया ठीक है, अब कई बार बच्चा नहीं कर पाता उस काम को। तब आपको कितना कठिनाई लगता है कि अच्छा ये लक्ष्य नहीं तय करना था। इसे नीचे लक्ष्य तय करना था।

00:03:16 Speaker 3

खाना वाना भी खूब खा लेता है।

00:03:18 Speaker 1

शुशु।

00:03:19 Speaker 3

पार्टी खुद बताता।

00:03:20 Speaker 1

है कोई नया काम आपने इसको सिखाने के लिए पहले दिन में दिया हो तब आपको लगा तक तो कोई काम नहीं दिया गया। अच्छा अच्छा जी जी बिलकुल जी जी सो अपने बच्चों को चित्रकारी पढ़ने।

00:03:31 Speaker 1

पढ़ाई वगैरह में उसको है ना इंटरैस्टिंग करने के लिए पढ़ाने के लिए बताने के लिए कि पढ़ाई कर लो, है ना? उसमें आपको कोई समस्या का सामना करना पड़ता।

00:03:40 Speaker 2

हो नहीं, मुझे तो कुछ निकलना पड़ता है अच्छा वो पढ़ने में भी उसको जैसे पढ़ती है जी खुद से पढ़ती है जैसे नॉर्मल बच्चे पढ़ाई को लेकर को।

00:03:49 Speaker 2

अपने ऊपर भी कॉन्फिडेंस रखते हैं, वैसे उसको भी है नॉर्मल की तरह वो खुद से बैठती है टाइम टेबल वो खुद से अपना बैग पैक करती है।

00:03:57 Speaker 1

जी जी आपा

00:03:58 Speaker 3

जी ये इसको एसएमआर वो ऐसा नहीं चौक बॉक का तोड़ते हैं बनाते हैं क्योंकि उसका बचपन से उसको बहुत शौक है।

00:04:05 Speaker 1

अच्छा।

00:04:05 Speaker 3

अच्छा तो ये देखता बहुत शौक से है।

00:04:08 Speaker 3

और घर में चाइना के लिए वगैरह हम लोगों ने लाके दिए तो उसको मिलाएगा फिर।

00:04:11 Speaker 1

वो।

00:04:11 Speaker 3

करेगा तो इसका उस तरफ रुझान रहता है।

00:04:14 Speaker 1

अच्छा अच्छा अच्छा बट वही की थोड़ा सा पढ़ाई जब दूसरी चीजे मैंने एंजैम्पल दिया है तो क्लेम में तो इनका इन्ट्रेस्ट है तो वो कर रहे है बट जो इंट्रेस्ट नहीं है।

00:04:23 Speaker 3

जी।

00:04:23 Speaker 1

उसमें फिर समस्या का सामना करना पड़ता आपको?

00:04:26 Speaker 3

नहीं, कोई समस्या फिलहाल तो नहीं है।

00:04:28 Speaker 3

अब जैसे हम लोग इनका नेचर समझ के अब तो ये बहुत ठीक हो गया है अच्छा?

00:04:31 Speaker 1

अच्छा

00:04:32 Speaker 3

पहले टाइम ये दो 3 साल का था तो कपड़ा एक दम पहनता ही नहीं था तो हम लोग उस टाइम गज़िआबाद क्रॉसिंग में रहते थे तो वो एक लेडी थी। आप भी लोग मतलब उनका क्लिनिक था तो वहाँ इसको वो।

00:04:47 Speaker 3

फिजिकल थेरेपी वगैरह उन्होंने कराई जी जी दिसंबर की ठंड में फिर ये कपड़े का काँटन लाईएँ उसको फील कराइएँ कपड़ा कैसे तो फील करके फिर ये कपड़े पहनने लगा। जी जी?

00:04:58 Speaker 1

ठीक है, अपने बच्चों को जब कई बार कुछ अच्छा काम कर लेता है, फिर आप उसको सराहना करते हैं, तो उसमें कोई कठिनाई का सामना करना पड़ता होगा।

00:05:07 Speaker 1

आपको मालूम चलता है कि अच्छा इस बीच के अनुसार बच्चों को ये बोलना चाहिए या फिर ये सजेशनस देने चाहिए।

00:05:13 Speaker 2

माशाला? मेरी बेटी ये सब चीज़ से बिल्कुल ठीक ठाक है तो मुझे ये सब चीज़ का सामना कभी करना ही नहीं पड़ा।

00:05:18 Speaker 1

अच्छा

00:05:19 Speaker 3

अच्छा स्पीच ये बोल ही नहीं पाता है।

00:05:21 Speaker 1

हाँ, हाँ।

00:05:22 Speaker 3

तो बस अपने आप से खाना खाएगा।

00:05:25 Speaker 3

माँ से कहकर खाना आमलेट खाना तो आमलेट बना दो अंडा देगा फिर इससे पानी खुद निकालता है फौटी आती है खुद ही बताएगा कि हमें जाना है, कभी बाहर नहीं करेगा।

00:05:35 Speaker 1



वो तो ठीक है लेकिन आप जब सराहना करते हैं तो क्या वो सराहना को इज़्ज़ैक्टली समझ पाता है कि नहीं समझ पाता ये?

00:05:41 Speaker 3

क्लैपिंग करते हैं

00:05:42 Speaker 1

आपके लोग क्लैपिंग कर रहे हैं

00:05:43 Speaker 3

तो ये माँ एम ने बताया था की जितना अच्छा अच्छा करे तो आप लोग अच्छा अच्छा

00:05:46 Speaker 1

अच्छा अच्छा अच्छा जी जी जी

00:05:49 Speaker 3

कटवाना पड़ता था अब ये बैठ जाता है बाल कटवाने

00:05:51 Speaker 1

जी जी जी जी

00:05:52 Speaker 3

अब आराम से कटवा लेता हूँ

00:05:53 Speaker 1

जी जी

00:05:53 Speaker 3

ये सब मैं जब ये था स्टार्ट की मैं बात बता रहा

00:05:56 Speaker 1

हूँ हाँ, हाँ तब तब ये

00:05:58 Speaker 3

अकेला रहना पसंद करता

00:05:59 Speaker 1

था अच्छा हाँ

00:06:01 Speaker 3

अच्छा तो फिर आप ये

00:06:03 Speaker 3

जब स्कूल भी आने लगा हाँ

00:06:04 Speaker 1

हाँ

00:06:05 Speaker 3

हाँ, हम यहाँ बच्चों के साथ लंच भी उसके ऊपर आते हैं, हाँ हाँ, हाँ वहाँ बैठता समझने लगा है हाँ हाँ, हाँ, तो थोड़ा फर्क आ गया है।

00:06:12 Speaker 1

अच्छा अच्छा ठीक है अगला प्रश्न है पांचवा प्रश्न जब अपने बच्चों के लिए अलगअलग तरीकों से आप उसको

00:06:19 Speaker 1

कोई उसकी योग्यता के अनुसार कुछ काम देते हैं, जैसे की बोल कर होता है। कई बार चित्रों के श्रू से कई बार स्पीच नहीं आती। बच्चों में राइट तब भी हो सकता है या फिर कोई दूसरा काम अपने हाथों से बताया की ये काम करना है तब कोई प्रॉब्लम का सामना करना पड़ता हो, आपको तब भी नहीं है ना आपको?

00:06:35 Speaker 3

ये प्रॉब्लम असल में ये बोल नहीं पाता है।

00:06:38 Speaker 1

अच्छा।

00:06:39 Speaker 3

हम हम लोग इसको समझाते नहीं, कोई बात तो ये समझ नहीं पाता।

00:06:42 Speaker 1

है।

00:06:43 Speaker 3

बस खाली मुँह देखता है, हंसता रहेगा।

00:06:46 Speaker 1

अच्छा अच्छा अच्छा

00:06:47 Speaker 3

ठीक और पहले रेस्ट बहुत होता था। इसने घर का टी वी भी तोड़ दिया था।

00:06:50 Speaker 1

अच्छा

00:06:51 Speaker 3

ये मतलब प्लेट में ये खा रहा था।

00:06:54 Speaker 3

अगर ये खाने से इसके आपको चाय इनके मम्मी पापा कोई भी दादू को कोई भी उठा ले वो बर्दाश्त नहीं करता।

00:07:00 Speaker 1

है।

00:07:00 Speaker 3

तो उसने प्लेट खींच के मार दी। टीवी टूट गया था।

00:07:03 Speaker 1

अरे?

00:07:03 Speaker 3

हाँ, लेकिन अब रश बहुत कम होता।

00:07:05 Speaker 1

है। अच्छा

00:07:05 Speaker 3

पहले बहुत रश होता था।

00:07:06 Speaker 1

अच्छा अच्छा अच्छा चलिए अगला प्रश्न है आपका छठवाँ प्रश्न जिसमें आपा

00:07:12 Speaker 1

अपने बच्चों को दोष बनाने या दोस्ती बनाए रखने में कौन कौन सी समस्या का सामना करना पड़ता है क्योंकि कई बार आपको समझाना पड़ता है। बच्चों को की अच्छा इनसे दोस्ती या दोस्ती करो सबसे दोस्ती करो जाके कूदो तब कई बार का सामना करना पड़ता होगा।

00:07:25 Speaker 2

नहीं, ये दोस्ती भी जल्दी बना लेती है।

00:07:27 Speaker 1

अच्छा और मेंटेन रखती है दोस्ती।

00:07:29 Speaker 2

मेंटेन रखती है और।

00:07:30 Speaker 1

पूरा चारों।

00:07:31 Speaker 2

तरफ आना जाना करती नहीं है। अगर ये कभी मैं इसको कहीं लेके जाती हूँ तो इसको सबसे जल्दी दोस्ती हो जाती है।

00:07:38 Speaker 1

अच्छा।

00:07:39 Speaker 2

और वो याद भी रखती है कि हम फलाने तारीक में फलाने से मिले है।

00:07:44 Speaker 3

अच्छा, इनको इनकी दोस्ती नहीं हो पाती है। हुई थोड़ी बहुत तो अब जैसे बैटरी से इसको ले जाते है तो कोई जवान सी लड़की दिख गयी। उसके बाल वॉल यूँ करने लगे तो हम उनको बताया नहीं। परेशान हो गया बच्चा ऐसा है तो बेचारी बहुत खयाल करती है।

00:08:02 Speaker 3

तो ये कि जैसे आपसे घुलते मिलते हैं।

00:08:04 Speaker 1

हाँ।

00:08:04 Speaker 3

ये कोशिश करते हैं घुलने

00:08:05 Speaker 1

मिलने मिलने की हाँ

00:08:06 Speaker 3

आपसे यूँ मिलेंगे, प्यार करेंगे, हाथ मिलाएंगे।

00:08:09 Speaker 1

मतलब एंजैक्टली जो दोस्ती करना और दोस्ती बनाए रखना वो बहुत दूर वो थोड़ा सा प्रॉब्लम है। जी जी जी, वैसे आप उनको पार्क वगैरह ले के जाते हैं? जी आप पार्क।

00:08:19 Speaker 3

लो

00:08:19 Speaker 1

जाते हैं ना लोगों से मिलवाते हैं ताकि।

00:08:21 Speaker 1

हाँ मतलब उनको समझ में आया की अच्छा ये दोस्ती के लिए हमारा पहला स्टेप है। देन उसका सातवाँ प्रश्न है। अपने बच्चों को सामाजिक कौशल सिखाने के लिए जैसे की बाटकर खाना या फिर अपने बारी का इंतज़ार करना। कई बार ऐसा होता है की हमें बारी का इंतज़ार करना होता है। कई बार मिलकर काम करना, कोई काम दे दिया तो मिलकर काम करना।

00:08:40 Speaker 1

इसमें कोई कठिनाई का सामना करना पड़ता हो।

00:08:41 Speaker 2

नहीं शुरूशुरू में इसको जब ये सिखाएं शेयरिंग करना जब से सिखाएं जब से इसमें ये आदत हो गया और ये अब ये सब चीज़ करती हैं।

00:08:50 Speaker 1

अच्छा आप।

00:08:51 Speaker 3

ये शेयरिंग नहीं करते हमने बताया कि ये अपना खाएंगे, किसी का लेंगे भी नहीं, कभी कोई है तो उठा भी लेंगे तो हम लोग को।

00:08:58 Speaker 3

थोड़ा वो था दूसरे का बच्चे का ले लिया ये हो तो ये सब इसमें रहा

00:09:02 Speaker 1

है। आपने कोशिश किया उसको सिखाने के लिए इसके लिए?

00:09:04 Speaker 3

आप कोशिश करा कि बुरी बात ये नहीं खाते तो?

00:09:07 Speaker 1

वो लेकिन समझे नहीं समझा

00:09:09 Speaker 3

नहीं पा रहा कि ये चीज़ गलत है जी।

00:09:11 Speaker 1

जी जी जी, ठीक है और समझाने के लिए आपने मतलब कैसे मतलब ऐसे बर्बला

00:09:16 Speaker 3

हाँ जी।

00:09:17 Speaker 1

जी जी, ठीक है।

00:09:18 Speaker 1

आत्मा प्रश्न है जब आपका बच्चा समूह गतिविधियों में खेल रहा है यानी ग्रुप में कुछ खेल रहा हो? जी जी समूह गतिविधियों में खेल रहा हो, ग्रुप में खेल रहा हो तब ऐसे खेलों में भाग लेने में है ना? उसमें पार्टिसिपेट करना है, मिलकर खेलना है तो कोई समस्या का सामना करना पड़ता हो, साथ में मिलकर खेलना हमें

00:09:35 Speaker 3

नहीं।

00:09:36 Speaker 1

ऐसा कोई समस्या का नहीं आपका।

00:09:37 Speaker 3

ये साथ में खेलता तो है लेकिन खुद ही जिसे बॉल खेला है तो अलग खेलेगा।

00:09:42 Speaker 1

अच्छा मतलब साथ में होगा अभी साथ में

00:09:44 Speaker 3

नहीं।

00:09:44 Speaker 1

रहेगा अच्छा उसमें कभी पैसा आपने खिलाने की कोशिश की है साथ में बिठाकर।

00:09:48 Speaker 3

हाँ बैठा है कि भाई इसके छोटा वो ठीक है, उसके साथ खेलें मगर उसके साथ भी खेलेगा।

00:09:54 Speaker 1

तो?

00:09:54 Speaker 3

झूला बहुत शौक से झूलता है।

00:09:55 Speaker 3

खुद ही झूलिया खुद ही आया भी आया।

00:09:58 Speaker 1

अच्छा।

00:09:58 Speaker 3

कुछ प्रॉपरा

00:09:59 Speaker 1

अच्छा थोड़ी देर के लिए खेलते थे।

00:10:01 Speaker 3

तो आधा घंटा है बस।

00:10:02 Speaker 1

अच्छा अच्छा नेक्स्ट है आपका जब आपका बच्चा दूसरों के साथ सहयोग का महत्व समझने समझाने में है ना आप कई बार अपने बच्चों को समझाते हैं की भैया साथ में मिलकर काम करोगे तो अच्छा रहेगा।

00:10:15 Speaker 1

साथ में मिलके चलोगे तो अच्छा रहेगा, साथ में मिलके खेलेंगे तो बढ़िया रहेगा तब आपको कोई समस्या का सामना करना पड़ता नहीं। भूल के बताइए माँ एम नहीं तो ये आएगा नहीं नहीं।

00:10:26 Speaker 3

क्या पूछ रहा?

00:10:27 Speaker 1

था। मैंने पूछा था कि जब कई बार बच्चों को बताते हैं ना कि मिलकर खेलना है, मिलकर खाना है, मिलकर बैठना है तब उससे?

00:10:32 Speaker 3

कभी यो

00:10:33 Speaker 3

नहीं, समस्या का हम लोगों ने कभी उसी टाइम खेल रहा है तो बता दिया कैसे गेस्ट के बच्चे आ गए उनसे थोड़ी देर मिक्स होगा, फिर अलग हो चला जाएगा। अच्छा?

00:10:42 Speaker 1

अच्छा।

00:10:43 Speaker 3

हाँ, तो ज्यादा मिक्स अप नहीं हो पाता।

00:10:44 Speaker 1

है। अच्छा, अच्छा अच्छा ठीक है, दसवां प्रश्न है जब आपके बच्चा जो है।

00:10:50 Speaker 1

साथियों के द्वारा अस्वीकृति मिलती है। कई बार उनको क्या होता है? अक्सेप्टेंस नहीं मिलती है, कई बार उनको मना कर देते हैं, दोष वगैरह की भाई नहीं तुम हमारा सपना खेलो। याद में ना कुछ भी चीजे होती है सो कई बार गलतफहमियों का भी सरकार होती है। जब आपने नया बच्चा आपने देखा होगा स्टार्टिंग में तो कई सारे मोहल्ले में लोग बोल रहे होंगे की कौन है, कैसा है, क्या है, है ना? यानी ये सब चीजों में

00:11:09 Speaker 1

तब आपको क्या कठिनाई का सामना करना पड़ता है? ये चीज समझाने में बच्चों को अपने।

00:11:13 Speaker 2



नहीं ऐसे तो कुछ जैसे वो कभी कभी ये चीज़ ध्यान में रख लेती है कि मैं चलती नहीं हूँ इसलिए मेरा भाई बहन मुझसे अलग अलग रहता है। वो कभी कभी ये सब चीज़ हमसे शेयर करती है की मम्मा मैं चलती नहीं हूँ ना।

00:11:26 Speaker 2

ये मुझे सब छोड़ देता है सबा

00:11:28 Speaker 1

छोड़ देता है सब बाता

00:11:29 Speaker 2

बट ऐसा है नहीं कभी कभी लेकिन वो ये चीज़ शेयर करती है।

00:11:32 Speaker 1

हाँ, शेयर करती है देन उस पर फिर आप मतलबा

00:11:34 Speaker 2

नहीं फिर मैं उसको समझाती हूँ, मैं उसको समझाती हूँ तो वो बात मान जाती है, वो बोलती है, नहीं, इसी तरह मैं बोल रही।

00:11:41 Speaker 1

हूँ अच्छा, अच्छा ठीक है, ठीक है, आप चलो।

00:11:44 Speaker 3

अभी इनको समझाते है बताया आपको भी ये समझ नहीं पाते है बस हसेगा हसता रहता है हसेगा बेटा बुरी बात ये वो ऐसे नहीं करता, ये सब है और ये थोड़ा सा अकेले रहने का आदि टाइप हो गया है या इमोर कमा

00:12:02 Speaker 3

हाँ, वही चीज़ है ना अक्ववली यही ये प्रश्न मैं इसका बहुत उत्तर दे रहा हूँ। आपको ये आपके बहुत काम आएगा। इससे छोटा पोता मेरा 1 साल तो ये उस टाइम 1 साल का था तो इसको जो है वो माँ छोटे वाले को लिए तो इसको नहीं लिए। हाँ हाँ उस टाइम।

00:12:21 Speaker 3

इनकी नानी और दादी नहीं थी। ये लोग कह रहे थे मैं भी नहीं था मैं जैसे डेलिवरी टाइम आ गया, चला गया कानपुर वापस तो ये थोड़ा इमोर हुआ है। मेरा मतलब ये सबसे ज्यादा इस बात से पहले हमने मैं अपनी तरफ से कह रहा हूँ जो मैंने बचपन में देखा है।

00:12:40 Speaker 3

उनकी जो बड़े बूढ़े जो होती थी घर में होते हैं दादी माँ अपना गोद मिले के उनसे बता रहे हैं। बात हाँ वो हंस रहे हैं बच्चे ये सब इसके साथ नहीं हुआ।

00:12:50 Speaker 1

तो?

00:12:51 Speaker 3

कभी कभी टैब भी दे दिया। अपना टैब भी खेल रहा है तो इग्नोर ही मेन मक्सामक सकता है, जिसके कारण मतलब मैं अभी।

00:13:00 Speaker 1

हाँ, ठीक है।

00:13:01 Speaker 3

ये।

00:13:02 Speaker 1

बिल्कुल सही कह रहे हैं। आप देन, अपने बच्चों को पढ़ाई या कोई भी गतिविधि जिसमें आप उसको इन्वॉल्व करना चाहते हैं, उसके लिए प्रेरित करने में की बेटा मैं ये कम करूँ, है ना? उसके लिए आपको कोई कठिनाई का सामना करना पड़ता हो। नहीं मुझे ऐसा कुछ नहीं आपको।

00:13:15 Speaker 3

प्रेरित करने में उन्होंने होता जैसे घर पे भी इससे हर कुछ जैसे डस्ट।

00:13:21 Speaker 3

चिप्स का रैपर फाड़ा, डस्टबिन में डाल के आओ तो यहाँ भी डस्टबिन में डाल के आता है ये सब चीजें इसको हम लोग बताते रहे तो ये करता है मतलब हर बार।

00:13:29 Speaker 1

बताना।

00:13:29 Speaker 3

पड़ता है, बताना पड़ता है बेटा ये बात ठीक है नहीं, ऐसे नहीं करते हैं, ऐसा तो नहीं।

00:13:32 Speaker 1

किया। एक बार बता दिया देन हर बार वो रिपीट कर रहा है मतलब बार बार ठीक कर रहा है।

00:13:36 Speaker 3

नहीं ऐसा नहीं है, वो एक बार समझ लेता है। सहन का बहुत अच्छा है यो

### 00:13:40 Speaker 3

मतलब आप समझ लीजिये की ये क्या करता है जिसे हम लोग उनकी माँ सो रही है और ऊपर इसकी वजह से डोर की कुंडियां ऊपर लगाई गई थी। इसको नहाने का बहुत शौक है तो वहाँ भी थे एक गाज़ियाबाद में तो छोटा सा पूल था, उसमें नहाता था। हाँ तो यहाँ भी ये नहीं समझ पाता ये बहुत सदी है तो हमें नहीं नहाना चाहिए या गर्म पानी से नहाना चाहिए।

### 00:13:59 Speaker 3

तो ये नहीं समझता। ठंडे से नहाने लगता है तो ऊपर तो ये अब क्या करता है? ये स्टूल रख ले उसपे अपने आप ही स्टूल पे खड़ा होगा तब कुंडली खोलेगा इतनी है की

### 00:14:09 Speaker 1

हम यहाँ तका

### 00:14:10 Speaker 3

कैसे पहुंचे?

### 00:14:11 Speaker 1

चलिए ठीक है, अगला है अपने बच्चों की आलोचना करने से बचते हुए कई बार आपको भी है ना आलोचना करनी पड़ जाती है या गुस्सा आ जाता है।

### 00:14:19 Speaker 1

उस टाइम पे बचते हुए किस तरह से आप ट्राई करते है, है ना और उसकी केवल प्रगति पर ध्यान देते हुए आपको कौन सी कठिनाई का सामना करना पड़ता है? कई बार से आलोचना ना करें और उसको सिर्फ हम बताएंगे। बेटा ये काम करो कई बार हो जाता है ना की फ्रस्ट्रेशन में है, गुस्से में है हम लोग भी है नहीं कंट्रोल हो रहा बट हमें बोलना की नहीं बेटा ये काम करो तब

### 00:14:38 Speaker 1

बहुत सारी प्रॉब्लम का सामना करना पड़ता होगा आपको मुझे तो ये समझ नहीं आता कभी गुस्सा आया कभी भी नहीं नहीं, मुझे तो ऐसा नहीं है। बिल्कुल भी नहीं, कभी नहीं, अच्छा अच्छा जी।

### 00:14:49 Speaker 3

नहीं इसको गुस्सा हम लोग को भी गुस्सा नहीं आता है। बट डांट दो, अब ये डांट समझने लगा।

### 00:14:56 Speaker 1

है।

00:14:56 Speaker 1

जैसे आप डांट रहे हैं, आप कोशिश कर रहे हैं कि मैं ना डांटू बट इसको मैं बोलूँ ये काम करो तब कई सारे कटने का समय क्या आपका गुस्सा?

00:15:04 Speaker 3

नहीं है गुस्सा हम लोग घर में कोई भी नहीं करता, इसको इसके भाई व्हाई भी नहीं करते हैं। इससे बड़ा है भाई ये 1213 साल का है। जी जी वो लोग भी नहीं करते हैं जी।

00:15:15 Speaker 3

इसको हम लोग समझते हैं ना? अच्छा?

00:15:16 Speaker 1

अच्छा जी जी जी अच्छा तेरहवां प्रश्न है अपने बच्चों को छोटी छोटी सफलताएं कई छोटे छोटे काम कर दिए ठीक है उसमें आप बारबार उसको प्रोत्साहन देने के लिए है ना? उसको साहित्य बनाए रखने के लिए कौन कौन सी समस्या का सामना करना पड़ता है?

00:15:34 Speaker 1

अच्छा आपा

00:15:36 Speaker 3

कोई समस्या जिसे हम लोग पहले इसको रेड ब्लैक कलर व्हाइट ये सब दिखाते थे, पहचानने की कोशिश करते थे। लेकिन ये उस जीस जीस तरह इसका जेहन है जो हमारी रीडिंग पर्सनल है। उस जेहन के हिसाब से ये फॉलो नहीं कर पा रहा है। जेहन का बहुत तेज है ये।

00:15:53 Speaker 3

हमने आपको बताया कि जैसे स्टूल पे खोल लेगा, कहीं जाएगा तो सिर्फ जैसे अब गाड़ी आ रही है। इसको भी मालूम है कि साथ में कार आ रही है वहाँ एक्सीडेंट हो जाएगा।

00:16:01 Speaker 1

अच्छा।

00:16:02 Speaker 3

ये भी इन लोग डर टाइप नहीं है। इसके अंदर जैसे ये पानी बहुत पूल का गहरा तो हम छोटे पूल में खड़े रहते थे, नहलाते बिलकुल।

00:16:10 Speaker 1

बिल्कुल

00:16:10 Speaker 3

लेकिन ये?

00:16:11 Speaker 3

ये नहीं समझता की हम बड़े में ना जाये, बार बार कोशिश करेगा हम उसमें जाये तो ये डर से निडर है। मतलब ऐसे?

00:16:20 Speaker 1

अगला है फोर्टीन्थ केश्वन अपने बच्चों को असफलता के बाद भी जब उसका असफल हो गया किसी काम में, उसके बाद भी नए कार्य देने में अब वो क्या क्या कठिनाइयों का सामना करना पड़ता है?

00:16:32 Speaker 2

पहले तो उसको समझा देते हैं कि चलिए ये काम नहीं हो पाया, कोई बात नहीं है, मुश्किल नहीं है। आप मेहनत कीजिएगा तो हो जाएगा तो वो खुश हो जाती है और फिर उस चीज़ का उसको लगन होने लगता।

00:16:43 Speaker 1

है। अच्छा।

00:16:44 Speaker 3

रूटीन मेन में इसको जो होता है, व्यक्ति उस समय जो समस्या।

00:16:50 Speaker 3

एट दैट टाइम फेस आती है तो तो हम लोग उसको समझाते हैं बड़ी बुरी बात है, ये फिर नहीं मानेगा, फिर वो करेगा, ज़िद करेगा नहीं जी।

00:17:00 Speaker 1

देन पन्द्रहवाँ प्रश्न है आपका अपने बच्चों के लिए धैर्य और सकारात्मक का उदाहरण बनने में यानी कि अपने ऊपर भी धैर्य रखना।

00:17:08 Speaker 1

है ना की भाई बिल्कुल भी गुस्सा कहीं पे भी गलती से भी ना हो और उसको सकारात्मक बनाए रखने में राइट आपको कौन कौन सी कठिनाई का सामना करना पड़ता?

00:17:15 Speaker 2

है जी वो कभी कभी होता है, अंदर से गुस्सा गुस्सा तो मैं कोशिश करती हूँ की उसके सामने ये ज़ाहिर ना करूँ ताकि उसको ये ना लगे की मम्मी गुस्सा कर रही है।

00:17:25 Speaker 1

ठीक है। बेरी गुडा।

00:17:26 Speaker 3

ये एक्सप्रेसन समझ जाता है।

00:17:28 Speaker 1

अच्छा, आप एक्सप्रेसन।

00:17:29 Speaker 3

हाँ, जैसे की बुरी बात है फिर 2 मिनट बैठेगा। फिर उठ के भागेगा मतलब ये अब ये गुस्सा समझने लगा कि मतलब सामने वाला मेरे ऊपर कोई वजह से गुस्सा?

00:17:39 Speaker 1

कर रहा है ठीक है, ठीक है, अब उसके बाद अपने बच्चों को उसकी भावनाओं समझाने में।

00:17:47 Speaker 1

कई बार उसको अलग अलग तरह की भावनाओं होती है। दुखी, खुशी ये सब बहुत सारी भावनाओं हमारे अंदर रहती है। तीरशा भी कई बार हमारे अंदर भावना जन मिलती तो फिर इस टाइप में आपको समझाने में की भाई ये ऐसी भावना है, इसका क्या मतलब है और क्यों करना चाहिए? नहीं करना चाहिए राइट ये सब चीजों में कभी कठिनाई का सामना करना पड़ता।

00:18:03 Speaker 2

हो?

00:18:04 Speaker 2

हाँ, कभीकभी तो समझ में नहीं आता है की कैसे हम अपने बच्चों को समझाएं। कभीकभी तो बहुत सामना करना पड़ता है। कभी आदत जेहन में आता भी नहीं है। वो होपलेस हो जाते हैं की आखिर क्या बोले तो होता है कभी कभी सामना करना।

00:18:18 Speaker 3

ठीक है आपको हाँ माँ बाप कठिनाई का तो नहीं इनको समझाते हैं और

00:18:24 Speaker 3

अपने कोशिश करते हैं कि हर बात समझे।

00:18:27 Speaker 1

और ऐसे कोई इसकी भावना है आप उसको समझाए कि भाई ये इस भावना का ये मतलब है।

00:18:32 Speaker 3

तो बहुत

00:18:32 Speaker 1

मुश्किल है क्योंकि भावना एक हमारा अंदर

00:18:34 Speaker 2

का?

00:18:34 Speaker 1

भाव है समझ?

00:18:35 Speaker 2

में नहीं आता

00:18:35 Speaker 1

नहीं समझ में आता नहीं समझ में नहीं समझ जी फिर अट्टारहवां प्रश्न है अपने

00:18:42 Speaker 1

बच्चों की हीन भावना या चिंता कई बार दुखी हो रहे हैं, परेशान हो रहे हैं, है ना? या फिर हीन भावना की? मैं नहीं कर सकता। बच्चों के अंदर आ जाती है तो इस टाइम में आपको बच्चों को मोटिवेट करने में उसको है ना समझाने में क्या क्या समस्याओं का सामना करना पड़ता?

00:18:55 Speaker 2

है हाँ, ये चीज़ में तो समस्या होता है। कभीकभी वो बोलती है।

00:18:59 Speaker 2

की अब ऐसा नहीं कर पाएगी, ऐसा कोई नहीं याद हो रहा है तो मुझे कभी कभी यह होता है कि सचमुच याद नहीं हो रहा है। इतना कोशिश कर रही है लेकिन फिर उसको समझाती हूँ की नहीं कोशिश करियेगा तो याद हो जायेगा तो फिर वह खुश बहुत जल्दी हो।

00:19:12 Speaker 1

जाती है। अच्छा जी।

00:19:15 Speaker 3

अभी तो कोई यह पढ़ रहा नहीं है।

00:19:18 Speaker 3

हाँ

00:19:18 Speaker 1

नहीं कोई भी चीज़ में जैसे आपका तो यहाँ पे कोई बच्चा, कभी ना किसी चीज़ से परेशान है कि नहीं खेल रहा कोई दोस्त लोग नहीं खिला रहे हैं कभी।

00:19:25 Speaker 3

ऐसा कभी नहीं होता है। अच्छा।

00:19:26 Speaker 1

तभी तो परेशान होता हूँ

00:19:27 Speaker 3

नहीं हम तो ले नहीं परेशान क्या होता?

00:19:29 Speaker 1

होगा यार।

00:19:29 Speaker 3

खेलते हैं। खेलेंगे आएगा खायेगा ये?

00:19:33 Speaker 1

ये बच्चा फिर ये तो एंजैम्पल दे रहा हूँ अभी।

00:19:35 Speaker 1

खेलने का एंजैम्पल दिया, पढ़ने का एंजैम्पल दिया, चित्रकारी का एंजैम्पल दिया या फिर आपने कोई चीज़ है, ना शॉप से खरीदने के लिए या कोई बहुत सारी चीज़ें किसी।

00:19:44 Speaker 3

ने मजाक नहीं होता, कभीकभी जिद कर लेता है कि हम ये भी लेंगे। हम ये भी चीज़ खाने के लिए लेंगे। ये सब जिद जिद बहुत करता है।

00:19:52 Speaker 1

अच्छा।

00:19:52 Speaker 1



क्योंकि जैसे कोई बच्चा चिंता में बैठा हुआ है या फिर अभी दुखी है, करके नहीं।

00:19:56 Speaker 3

कभी ऐसा इसके चेहरे से नहीं लग रहा।

00:19:58 Speaker 1

अच्छा अच्छा ठीक है, फिर अगला है उन्नीसवां प्रश्न अपने बच्चों को सामना करने वाली रणनीति यानी की जब कभी ऐसा दुखी हो या उस तरह से तो उसमें बहुत सारी रणनीति जैसे की एक गहरी सांस लेना और

00:20:11 Speaker 1

बातें करके अपना एक्सप्रेस करना क्या दुखी है? क्यूँ परेशान है? ठीक है, ये सब चीज़ सीखने में कभी कठिनाई का सामना करना पड़ता है।

00:20:19 Speaker 2

जी सर, वो कभी कभी बहुत मायूस रहती है मेरी बेटी तो मुझे मुझे खुद समझ में नहीं आती है आता है कि आखिर ये क्यूँ ऐसे चुपचाप है?

00:20:28 Speaker 2

तो मैं उससे बार बार एक ही सवाल पूछती हूँ की क्या हुआ, क्या हुआ? लेकिन वो कुछ बोलती नहीं है, बस यूँ ही कह के रह जाती नहीं मम्मा इसी तरह इसी तरह।

00:20:36 Speaker 1

अच्छा एग्जैक्टली।

00:20:38 Speaker 2

बताती नहीं है की हाँ ये है, वो है लेकिन वो मायूस बहुत रहती है। जैसे जैसे वो बड़ी हो रही है वैसे वैसे वो ये चीज़ उसमें होता जा रहा है। जी।

00:20:48 Speaker 1

अच्छा जी ये चीज़ हो रहा।

00:20:50 Speaker 2

है। पहले शुरू में ये चीज़ नहीं था, लेकिन अब मुझे फील होता है। कभी कभी ये शांत बहुत रहना शुरू कर दिए है।

00:20:57 Speaker 1

मैंने वही बताया ना जो भावनाओं होती है वो बचपन में सबसे पहले बच्चे की भावना होती है।

00:21:02 Speaker 2

जी जी

00:21:02 Speaker 1

धीरे धीरे से ऐसे बड़ा होता जाता था बहुत सारी भावना है

00:21:05 Speaker 2

जैसे लगता है वो कुछ सोच रही है

00:21:07 Speaker 2

ये मुझे फील होता है। ये वजह से कुछ सोच रही है लेकिन वो जाहिर नहीं कर पा रही है। हम को बोल नहीं सकती जी मैं इस चीज के लिए मैं हर वक्त उसके इसमें हूँ कि ताकि वो मुझे शेयर करें। मैं उसको हर दोस्त की तरफ मैं बोलती हूँ कि मम्मी दोस्त होती है, मैं ऐसा ऐसा हर बात जैसे एक नॉर्मल बच्चे को समझाया जाता है। मेरी बेटी नॉर्मल ही है।

00:21:26 Speaker 2

लेकिन कभीकभी वो ऐसे हो जाती है ना तो लगता है कि थोड़ा

00:21:30 Speaker 1

बता नहीं पाए जी।

00:21:32 Speaker 3

ऐसा हम लोग के साथ अभी नहीं हो रहा है कुछ कि हम फील करें कि ये क्या सोच रहा है? लेकिन कोशिश ये रहती कि इसका हम लोग ट्रेड समझ चूके हैं तो उस हिसाब से चलते हैं।

00:21:44 Speaker 1

अच्छा।

00:21:45 Speaker 1

जब आपका बच्चा कभी निराश हो तो उसको भावनाओं को मान्यता देने में यानी कि चलो बेटा दुखी होना भी ठीक है। इस लेवल पे इतना दुखी होना ठीक है, उसमें कई बार कठिनाइयों का सामना करना पड़ता है।

00:21:56 Speaker 2

जी मैं उसको बताती हूँ कि मैं भी बड़ी हूँ, मुझे भी परेशानी होती है जैसे मुझे कभी काम करने का दिल नहीं करता है।

00:22:04 Speaker 2

तो मैं भी परेशान हो जाती हूँ तो कोई बात नहीं है। जो काम नहीं हो रहा है तो अभी छोड़ दो, थोड़ा देर के बाद करोगी लेकिन मायूस मत हो ये सब चीज़ मैं इसको समझाती रहती।

00:22:13 Speaker 3

हूँ ऐसा भी कभी हुआ नहीं है मायूस हम लोग समझेंगे कभी मायूस नहीं होता है जी हंसता रहेगा खेलेगा।

00:22:24 Speaker 3

और कोई चीज़ डंटे तो पर बैठ ही आएगा, तो अभीअभी कुछ ऐसा नहीं समझ पाते।

00:22:31 Speaker 1

इक्कीसवां प्रश्न है अपने बच्चों को सकारात्मक आत्म छवि बनाने में सकारात्मक आपसे ही मतलब वो पॉजिटिव माइंडसेट के साथ रहे पॉजिटिव रहे पूरा लाइफ के लिए ठीक है क्योंकि हर आदमी पॉजिटिव नहीं रह पाता।

00:22:43 Speaker 1

सभी आदमी कोई भी इंसान पॉजिटिव नहीं है। पता हमेशा आप सब देखिए आप हो या कोई भी हो ठीक है तो इन बच्चों के लिए तो और प्रॉब्लम हो जाती है की भाई हमेशा पॉजिटिव रहना या ज्यादातर पॉजिटिव रहना सोचना ऐसी सोच रखना उसमें कौन कौन सी कठिनाइयों का सामना करना पड़ता है?

00:22:59 Speaker 2

हाँ, ये सब में भी है।

00:23:00 Speaker 2

वो नहीं रह पाती है। मुझे खुद समझ में कभी कभी नहीं आता है की मैं कैसे इसको अक्टिव रखू कैसे ये करू और ये चीज़ है?

00:23:09 Speaker 1

ठीक है तो उस टाइम पे आप कुछ ऐसे अक्टिविटी वगैरा में इन्वॉल्व करते हो?

00:23:12 Speaker 2

हाँ अक्टिविटी वो पेंटिंग बहुत शौक से करती है और वो अक्टिविटी वो ज्यादा कुछ कर नहीं पाती है, वो चलती नहीं है।

00:23:20 Speaker 2

वो हर चीज़ वो दूसरे पर डिपेंड है तो इसलिए जो भी काम करना पड़ता है तो मुझे ही करना पड़ता है।

00:23:25 Speaker 1

अच्छा बताना चाहेंगे सर?

00:23:29 Speaker 3

ये पॉजिटिव रहने

00:23:30 Speaker 1

का हम लोग

00:23:31 Speaker 3

पूरी कोशिश करते हैं। तब अब मतलब शूज पहनना है। जैसे अब ये शूज पहनता है उसको एक ही जूता 2 साल से पहनना है।

00:23:38 Speaker 1

अच्छा

00:23:38 Speaker 3

और जूते भी हैं नहीं।

00:23:40 Speaker 3

यही वाला चाहिए, वही पुराना पहन रहा है तो ये

00:23:43 Speaker 1

सब पूरा पॉजिटिव मैण्ड के साथ रहना लाइफ में तो इसके लिए आपने कुछ कोशिश किया बच्चों को सिखाने के लिए?

00:23:48 Speaker 3

इतनी पूरी कोशिश की जाती है, कपड़े पहन नहीं पहनता था, पहन रहा है। ठीक से अच्छे वाले कपड़े अपनी पसंद का ड्रेस निकाल लेता है।

00:23:56 Speaker 1

स्टार्टिंग में कुछ प्रॉब्लम आती होगी सिखाने में।

00:23:57 Speaker 3

बहुत ज्यादा तरली थी, ये तो पहनता ही नहीं था तू मैं बता रहा हूँ दिसंबर की ठंड में नहीं पहनता था कुछ ओरे कुछ भी।

00:24:04 Speaker 1

तो फिर उस टाइम पे कैसे मतलब? आपने कैसे मैनेज करना है भाई जो कपड़े को टच करना?

00:24:08 Speaker 3

है वो कपड़े टच करना और फिर इसकी फिजिकली थेरेपी कराई। उससे काफी फायदा मिला है। इसको अच्छा।

00:24:14 Speaker 3

टायर पे आते है दौड़वाते है तो इसको वो अच्छा भी लगने लगा

00:24:18 Speaker 1

हाँ वो अक्ववली फिजिकल अक्टिविटीज होती है जो हम लोग वही स्ट्रेटेजीज है सारी जो घर पे भी होनी चाहिए, बट पेरेंट्स को नहीं चल पाता है अच्छा अगला प्रश्न है हमारा बच्चे को अपनी क्षमता पहचानने में कई बार क्षमता पहचानता है बच्चा?

00:24:30 Speaker 1

उसको पहचानने में कई बार कठनाई का सामना करना पड़ता है की वो ऐसे ये काम भी कर सकता है हम

00:24:35 Speaker 3

लोग

00:24:35 Speaker 1

भी अपना नहीं जानते है ना क्षमता हम पहचान पाते है कैपेबिलिटीज की हमारी तो उसमें पहचानने में बच्चों को बताने में की बेटा तुम ये कर सकते हो ये पॉसिबिलिटी है तुमने तुम्हारे पास हाँ, बहुत सारी क्षमता है। कई सारी कठनाई का सामना करना पड़ता होगा हाँ वो

00:24:49 Speaker 2

वो कहती है कि मुझसे नहीं होगा जैसे मैं वो कुछ अपने से काम नहीं कर पाती है तो मैं बोलेंगे कोशिश करो तो हो जायेगा तो वो कहती है कि नहीं मुझसे नहीं हो पायेगा तो मुझे ये सिर्फ चीज का सामना करना पड़ रहा है की आखिर में उसको कैसे वो लगातार वो रिपीट यही जी जी जी नहीं, मैं आशा नहीं कर पायेगी, आशा नहीं कर पायेगी।

00:25:07 Speaker 1

अच्छा अच्छा जी, आप बताये

00:25:09 Speaker 3

ऐसा अभी तक वो नहीं हुआ है और हम ये उठा लाईये लिया था ये करियर। इससे थोड़ाथोड़ा हम लोग कराते हैं। घर में तो अब जैसे अण्डापना आएगा तो चीज खुद ही निकाल के डाल देगा उसमें। मगर इसको नहीं मालूम कि अंडे में पड़ना क्या चाहिए?

00:25:27 Speaker 1

अच्छा जी।

00:25:28 Speaker 2

जी जी।

00:25:28 Speaker 3

ठीका

00:25:28 Speaker 1

है।

00:25:30 Speaker 3

बस इनको अच्छा लगना चाहिए और हर चीज़ को सूंघ के खाता है।

00:25:33 Speaker 1

अच्छा।

00:25:34 Speaker 3

पहले स्मेल करेगा।

00:25:35 Speaker 1

अंदर खायेगा?

00:25:35 Speaker 3

फिर खायेगा जी जी, बढ़िया।

00:25:37 Speaker 1

है देन तीसरा प्रश्न है अपने बच्चों को नकारात्मक नामों से पुकारने में ठीक है? कई बार हम लोग अलगा

00:25:44 Speaker 1

बेवकूफ नहलाया कई बार ऐसा भी बोल देते हैं गलती से या फिर पड़ोसी वड़ोसी में या फिर कमी में कह देता है आदमी राइट तो उस टाइम से शब्दों से बचाने में की ऐसी चीज़ ना बोली जाए। कई बार कठिनाई का सामना करना पड़ता होगा तो क्या चीज़ें है वो सब?

00:25:58 Speaker 2

नहीं, मुझे तो अभी तक ऐसा केसा

00:26:00 Speaker 1

आपने कभी मतलब आपको उसने बच्चे को हमेशा नाम से ही बुलाया है जी जी, किसी और ने या कम्यूनिटी में किसी ने?

00:26:05 Speaker 2

नहीं अभी वहाँ ऐसा कुछ नहीं हुआ है अभी तक ऐसा।

00:26:08 Speaker 1

कुछ नहीं हुआ है अच्छा

00:26:09 Speaker 3

अभी तक हमारे साथ भी ऐसा नहीं हुआ है और वो मैं इसको ले ले जाता हूँ बाहरा

00:26:17 Speaker 3

तो इतना मिक्स अप भी नहीं होता, अपना एक बैठा रहता है, नॉर्मल चिप्स खायेगा कोई चीज़ कोल्ड ड्रिंक पीएगा और खेलता है। पार्क में ये सब करता है तो अभी हम साथ रहते हैं इसलिए भी कोई नहीं शायद बोलता हो या जो भी है।

00:26:31 Speaker 1

ठीक है, उसके बाद चौबीसवां प्रश्न है आपका?

00:26:35 Speaker 1

अपने बच्चों को स्कूल या समाज में समावेशन करने के लिए यानी उसको इन्क्यूड करने के लिए की सपनों के साथ बैठे उठे खाये पिए एन्जॉय करे सभी लोगों के साथ यहाँ पे आपकी जरूरत नहीं है। आप आराम से बैठ सकते हैं की अच्छा वो बच्चा यहाँ फलाना हाँ सभी बच्चे जो भी मर्जी कर रहे हैं राइट सो उसमें आपको कई सारे कठिनाइयों का सामना करना पड़ता होगा।

00:26:53 Speaker 2

जी शुरू शुरू में वो नहीं एडजस्ट कर पाती थी दूसरों के साथ। लेकिन फिर धीरेधीरे उसमें स्कूल आने से ये सब चीज़ का आदत हो गया तो?

00:27:01 Speaker 1

स्कूल आने से स्टार्ट

00:27:03 Speaker 3

हो गया स्कूल आने से ये भी हमारा बच्चा जो स्कूल आने लगा तो उसको सबकी आदत पड़ गई। बच्चों को हमारा बिना भी बैठा है, कोई दिक्कत नहीं है। अच्छा?

00:27:11 Speaker 1

अच्छा अच्छा

00:27:13 Speaker 3

गुर्पिंगा

00:27:15 Speaker 1

हाँ, हाँ

00:27:15 Speaker 3

बहुत जरूरी है। मेरा अपना मानना है हाँ।

00:27:17 Speaker 1

हाँ, हाँ।

00:27:18 Speaker 3

इसमें जो है की बच्चे को दूसरों का साथ बहुत जरूरी है।

00:27:22 Speaker 1

अच्छा हाँ, बिल्कुल बिल्कुल।

00:27:24 Speaker 3

ताकि वो फ्री हो।

00:27:27 Speaker 1

हाँ, सब लोग।

00:27:27 Speaker 3

अकेलापन उसका दूर हो।

00:27:28 Speaker 1

हाँ, हाँ, हाँ, लेकिन अभी वो अभी नहीं मिल पाते होंगे। सबसे अधिक है ना जी?

00:27:34 Speaker 1

बंदन ये समझाने में कुछ कठिनाई का सामना करना पड़ता होगा की नहीं बेटा सबके बाद मिलो बैठो खाओ।

00:27:38 Speaker 3

हाँ, खाता है, लेकिन कोशिश ये जहाँ खावा देगा जैसे कोई बच्चे हैं, बोल नहीं पाता।

00:27:45 Speaker 1

तो बेसिक्ली आप समझाने की कोशिश करते हैं, बट समझ नहीं पाते। प्रॉब्लम ये है।

00:27:50 Speaker 1



पच्चीसवा प्रश्न है अपने बच्चो को खुद के लिए बोलना कई बार बताया ना जैसे मेरी बॉटल है मेरा पानी है मेरा या हाँ ये मेरे मम्मी पापा या अपने कई सारे चीज़े होती जो उनके लिए होते है जैसे मेट्रो में और ये मेरी सीट है राइट तो ऐसी चीज़े बोलने के लिए सिखाने के लिए कई बार आपको कठिनाई का सामना करना पड़ता होगा।

00:28:07 Speaker 2

नहीं मुझे ये सब चीज़ करना।

00:28:08 Speaker 1

है। अभी तो कुछ नहीं आपको?

00:28:09 Speaker 3

हम लोगों को भी नहीं होता, लेकिन ये अपनी चीज़ें पहचानना है।

00:28:12 Speaker 1

पहचान लेते।

00:28:13 Speaker 3

हैं। जैसे आप अब ये पानी की बोतल लाया है या अपनी टिफिन लाये हैं। यहाँ पर तो अपना टिफिन बोतल पहचानना है। आप कहीं रख दीजिए, वो जाएगा दूँड के निकालेगा अपनी ही बोतल पानी वो रखेगा। ये अपनी चीज़ें जो लाता है या कहीं जाता है तो उसको पहचानना छोड़ो ये मेरा है।

00:28:30 Speaker 1

ठीक है, छब्बीसवां प्रश्न है एक सुरक्षित और सहयोगी घर बनाने में एक अच्छा सा प्रॉपर घर बनाने के लिए कई बार वातावरण जो आपने बताया जैसे ऊपर नीचे हो जाता है, है ना? कई बार घर पे इतने सारे लोग बैठ रहे हैं तो ऊपर नीचे हो जाता होगा थोड़ा बहुत तो तो उस टाइम पे फिर क्या करते हैं आप लोग की? मतलब किस तरीके से हम ना?

00:28:49 Speaker 1

घर को एक अच्छा वातावरण बनाके रखें, पॉज़िटिव वातावरण बनाके रखें।

00:28:54 Speaker 2

नहीं मुझे तो इसके साथ वैसा जैसे दोनों बच्चे नॉर्मल बच्चों के साथ हो रहा है, उसी तरह ये भी करती है।

00:29:02 Speaker 1

सर की तरफ से भी।

00:29:03 Speaker 2

जी।

00:29:03 Speaker 1

एक बार आपस में उलझन हो गयी। हाँ फिर थोड़ा बहुत।

00:29:08 Speaker 1

नहीं।

00:29:09 Speaker 2

नहीं अभी तक मुझे ये सब चीज़ का तो नहीं करना पड़ा तो आइडिया।

00:29:13 Speaker 1

नहीं।

00:29:15 Speaker 3

अच्छा वातावरण है और जैसे मैं आपके बात में याद आ गया जो बड़ा भाई है इसका बारहतेरह साल का। वो ट्यूशन का एक 2 दिन \*\*\* उसमें कर दिया तो फादर ने इसके बेल्ट उठाई मारने के लिए।

00:29:28 Speaker 3

तो एक आध बार वो एकदो बेल्ट मार भी देता बड़े वाली हाँ तो ये जो है उस दिन बेल्ट वो बाप अपने बड़े वाले उससे कबीर नाम है उसके बड़े भाई का तो उससे बिगड़ रहा था वो की अभी तो बेल्ट कहाँ है मेरी ये वो बेल्ट रखी थी वहीं तो एक बेल्ट उठा के अंदर ले के आ गई इस बेल्ट से।

00:29:47 Speaker 3

पापा मारेंगे इसको इसमें इतनी अकल है।

00:29:52 Speaker 1

ठीक है।

00:29:52 Speaker 3

ये पॉइंट हमने जानबूझ के कराया था सही है।

00:29:55 Speaker 1

हाँ जी जी जी जी।

00:29:56 Speaker 3

मतलब इसको हाँ इस गाइड से बड़े भाई को।

00:30:00 Speaker 1

मारेंगे, मार पड़ सकती है इसमें राइट ओके सर सताईसवां प्रश्न है मेरा अपने बच्चों की जरूरतों को?

00:30:07 Speaker 1

शिक्षकों को या देखभाल करने वालों तक पहुंचाने के लिए कि बच्चे की क्या जरूरत है? टीचर्स को समझाना या फिर थेरेपीस पे जाकर समझाना या हॉस्पिटल में जाकर समझाना तो उसमें आपको कई कठिनाई का सामना करना पड़ता है। कई बार आप एक्सप्रेस कर पाते या नहीं कर पाते अपनी नीड्स को।

00:30:22 Speaker 2

जी।

00:30:23 Speaker 2

नहीं, ऐसा तो कुछ नहीं हुआ है लेकिन कभी कभी होता है कि मैं कैसे बोलूं? ये मुझे खुद समझ में नहीं आता है कि बच्चों में क्या पेशानी है, मैं कैसे शेयर करूं, कैसे बताऊं ये सब चीज का सामना करना पड़ता है। खुद समझ में कभी कभी आता ही नहीं कि कैसे हो क्या ही बताऊं ये?

00:30:39 Speaker 1

हमें नहीं समझ में आ रहा कि एग्जैक्टली तो कैसे समझाऊं?

00:30:43 Speaker 1

टीचर भी यहाँ आगे वाला कोई किस तरह से बात पहुंचेगी? बिल्कुल सही, बिल्कुल जी आपका भी।

00:30:47 Speaker 3

यहाँ सेमा

00:30:47 Speaker 2

जी मेरा

00:30:49 Speaker 1

अट्टाईसवां प्वाइंट हमारा है अपने बच्चों को घर के छोटे कार्यों में शामिल करने में कि बेटा ये काम भी है, वो काम भी है। कोई कठिनाई का सामना करना पड़ता हो।

00:30:57 Speaker 2

नहीं वो सब करना तो नहीं पड़ता है लेकिन वो अब जैसेजैसे बड़ी हो रही हैं तो।

00:31:02 Speaker 2

हर चीज़ में हाथ बंटाने की कोशिश करती हैं। बट वो अभी मजबूर है इस वजह से वो हो नहीं पाता है लेकिन वो कोशिश बहुत करती हैं।

00:31:10 Speaker 1

जी हाँ।

00:31:11 Speaker 3

तो ये जो चीज़ करते देखता है तो जैसे अब ये दाल, चावल वगैरह खाना बहुत मतलब शौक से खाता दाल जाता है तो जैसे बच जाएगा।

00:31:22 Speaker 3

तो एक कटोरी में उसको करेगा और कटोरी को फ्रिज में रख देगा कि उसको समझता है कि हम बाद में खाएंगे। यह रात हो गई, उसको नहीं मालूम है हम बाद में खाएंगे।

00:31:31 Speaker 1

अच्छा अच्छा देन उसके बाद हमारा है उन्तीसवां प्रश्न है अपने बच्चों के लिए परिवार।

00:31:39 Speaker 1

का वातावरण संगठित और सहयोगी बनाये रखने में कि भाई हम सब मिलके रहे साथ मिलके रहे बच्चों के लिए राइट तो उसमें कोई कठिनाई का सामना करना पड़ता।

00:31:47 Speaker 2

हो नहीं, उसमें भी कोई कठिनाई कार्य नहीं होता है। लेकिन वो आशा क्या करते हैं? बच्चों जो नॉर्मल बच्चे हैं उसको बोलती हूँ कि घर का माहौल अच्छा होना चाहिए ताकि आशा का?

00:31:58 Speaker 2

अच्छा, अच्छा व्यवहार आशा के साथ करें, हम लोग अच्छा से रहेंगे तभी तो वो सीखेगी।

00:32:03 Speaker 1

जी।

00:32:03 Speaker 2

बिल्कुल बिल्कुल जी।

00:32:04 Speaker 1

जी जी आप।

00:32:06 Speaker 3

ठीक है, उसके भाई भी समझते हैं, खेलते हैं। इससे कोई माहौल में कोई दिक्कत नहीं है। इसको सब सपोर्ट भी करते

00:32:12 Speaker 2

हैं कि हमारा माहौल अच्छा रहे ताकि उसको कोई असर हो। ऐसा गलत चीज़ ना

00:32:16 Speaker 1

सीख पाए।

00:32:19 Speaker 1

तीसवां प्रश्न है हमारा अपने बच्चों को चिकित्सा या विकासात्मक, जो हम लोग देते हैं ना अपने डेवलपमेंट के थेरेपीस वगैरह जो देते हैं। ये सब चीज़ें कराने में उनको अवेलेबल कराने में कई सारी कठिनाई का सामना करना पड़ता होगा।

00:32:34 Speaker 1

कई बार हो सकता है की कॉस्टूली हो या फिर कई बार बहुत सारी चीज़ें होती हैं वो।

00:32:37 Speaker 2

तो हुआ शुरू शुरू में उसको फिजियोथेरेपी की ही जरूरत है। लेकिन शुरू क्या कहते हैं? वो तीन 4 साल से नहीं करवा पा रहे हैं। होता है कुछ घरेलू प्रॉब्लम। इस वजह से उसका ये चीज़ बंद हो गया है जो बंद नहीं होना चाहिए।

00:32:51 Speaker 1

और कई बार जैसे।

00:32:53 Speaker 1

टाइम बच्चों के लिए देना उसमें भी बहुत ज्यादा टाइम है कोशिश।

00:32:55 Speaker 2

करके ज्यादा टाइम मैं आशा को देती हूँ वो बच्चे दो बच्चे जो हैं वो माशाअल्लाह अच्छे हैं तो उसका कोई टेंशन नहीं है। ज्यादा से ज्यादा टाइम अपने इस बेटी को देती हूँ।

00:33:07 Speaker 1

जी जी आप।

00:33:09 Speaker 3

हम लोग भी ज्यादा से ज्यादा टाइम देते हैं इसको।

00:33:11 Speaker 3

और कोशिश करते हैं कि ये सीखें कुछ जो हम लोग

00:33:15 Speaker 1

चिकित्सा वगैरह में है या

00:33:16 Speaker 3

नहीं उसमें नहीं जैसे थेरेपी आराम से कराता है। कुसुम किया जाता है।

00:33:20 Speaker 1

लेकिन थेरेपीस में करवाने में आपको कुछ

00:33:22 Speaker 3

प्रॉब्लम होती है, जैसे ₹600 पर डे है तो हम लोग उतना नहीं अफोर्ड है। स्पीच थेरेपी हम लोग कराना भी चाहते हैं, लेकिन

00:33:31 Speaker 3

इतना नहीं अफोर्ड कर सकते हैं दूसरे भाई और है, वो भी पाओ।

00:33:34 Speaker 2

ऐसा का तो फिजियोथेरेपी बंद होना ही नहीं था, लेकिन इधर दो 4 साल से बिल्कुल बंद ही समझिए बंद ही हो गया है। कुछ मजबूरी ऐसी है जो नहीं करा पा रहे हैं तो फाइनेंशियल।

00:33:45 Speaker 3

फाइनेंशियल।

00:33:46 Speaker 2

प्रॉब्लम की वजह से नहीं हो पा रहा है, जो बंद नहीं होना चाहिए, लेकिन मजबूरी में बंद है।

00:33:51 Speaker 1

जी जी जी, मेरा आखिरी प्रश्न है, इन सब चुनौतियों से जो हमने बातें की पूरी चुनौती पे हमने बात की। इसमें से आपको क्या लगता है की पेंटेस को क्या ऐसा कोई मॉड्यूल कुछ प्रोवाइड किया जा सकता है जहाँ पे मतलब वाकई पेंटेस को भी हेल्प हो पाए है ना की भाई अच्छा इस चीज के लिए है देन जैसे सब सपोज आपने यहाँ पे बात किये की कॉस्ट है।

00:34:11 Speaker 1

तो कहा मैं अगर मैं ऐसा कोई मॉड्यूल मैं डाल के बताऊँ की कहा पे आपको सस्ता या एकदम से फ्री कैपेन सकता है, है ना? क्या आपके राइट्स है? क्या आपके अधिकार है जो आपको पता होने चाहिए? राइट तो क्या ऐसा मॉड्यूल वगैरह बनेगा जो इन

कठिनाइयों पे है। बच्चा दोस्ती नहीं कर पा रहा है या फिर कभी है ना मायूस है तो बोल नहीं पा रहा। आपको बता नहीं पा रहा तो क्या ऐसा कुछ मॉड्यूल वगैरह होना चाहिए?

00:34:30 Speaker 3

बिल्कुल होना चाहिए। ये तो जो इस तरह के बच्चे हैं उनके गार्जियन्स के लिए स्पेशल।

00:34:34 Speaker 1

गार्जियन्स।

00:34:36 Speaker 3

के लिए स्पेशल बहुत बड़ी गाइडलाइन्स होगी। वो उनको आसानी जैसे हम शुरू में हम लोग तीनचार साल तक समझ ही नहीं पाए। इसको क्या है? नॉर्मल बच्चे के लिए बिहेव करते थे। रो रहा है तो दूध पी ले पी ले पिए या कुछ खा ले।

00:34:49 Speaker 3

लेकिन हम लोग बहुत दिन तक समझ ही नहीं पाए। ये क्या है? हम लोग को 234 साल बाद बोल दे रहा था। नहीं बोलना तो।

00:34:56 Speaker 1

अब।

00:34:58 Speaker 3

बस हम जो हमारा समझना है इस तरह के बच्चों के लिए की इमोर टाइप की जो चीज है वो बहुत घर करती है, नुकसान करती है बच्चा मतलब अगर छोटा है तो।

00:35:09 Speaker 3

बूढ़े लोग घर के दादी न या उसको खिलाते रहना बीच में तो अच्छा होता है और ये ज्वाइंट फैमिली में ही हो सकता है और कहीं दूर रह रहा लड़का बेटा काम साबित कर रहा बहु घर में है, वो देख रही है जितना देख सकती है जी जी तो उसमें थोड़ा वो।

00:35:25 Speaker 1

दिक्कत।

00:35:25 Speaker 3

है, दिक्कत है जी जी।

00:35:26 Speaker 3

मतलब इमोर नहीं होना चाहिए जी।

00:35:28 Speaker 1

जी तो बेसिक्की ऐसा टूल होना चाहिए?

00:35:30 Speaker 3

बिल्कुल गाइडलाइन्स जिसकी आप लोग अगर इसमें आप छापे हैं या इसको बताये लोगों को तो आने वाले जो पेरेंट्स बिल्कुल उनको बहुत फायदा मिलेगा।

00:35:45 Speaker 3

हम लोग को बताये हुए सिम्पटम्स को देख के वो समझ अच्छा।

00:35:48 Speaker 1

क्योंकि

00:35:49 Speaker 3

वो भी हमको भी एक बात बता रहा हूँ की पीछे अपोलो हॉस्पिटल के पीछे एक पार्क है तो वो पार्क में इसको ले गया। खेलने तो ये करीब 1718 साल का बच्चा उसको सब पागल पागल कह के दौबा रहे थे।

00:36:02 Speaker 3

तो अपने डेटा चलो बैठ जाओ बेटे हम तब भी नहीं समझे इसको भी ऑटिस्म लेकिन वो आया उसने हम इसी के हाथ से एक चीज़ का पैकेट छीन लिया। हम समझ गए इसको ऑटिस्म फिर मैं उसको बुला के बैठा दूसरा पैकेट मैं झोले में लिए हुए था, दूसरे बच्चे इनको भी दिया, उसको भी दिया उसको पिलाई हम लोगो को डाटा।

00:36:23 Speaker 1

जो मैंने प्रश्न डाला था की नकारात्मक नामों से कई बार बोला जाता।

00:36:25 Speaker 3

है। यही ना पब्लिक को पता ही नहीं है तो उसको जो है फिर हमने बैठा ला उसको दिया। वो अगर इसके पास छीनता नहीं तो हम नहीं समझ पाते। जब उसने आके इसका छीन लिया तो वो 1718 साल का बच्चा छोटे बच्चे से नहीं छीने का?

00:36:41 Speaker 3

बिल्कुल बिल्कुल बिल्कुल हम समझ गए इसको तो मैं उसको बुला के बैठा ला।

00:36:46 Speaker 1

मतलब मॉड्यूल में जैसे मैं सोच रहा था कि स्टार्टिंग में थोड़ा सा ये क्या क्या ऐसी चीज़ें होती है जिससे हम पता कर सकते हैं कि ये बच्चों में ये चीज़ें हैं और हमारे बच्चों में है या हमारे से रिलेटेड बच्चों में है ताकि आपको भी आसानी हो पाए? समझने में तो हम।



00:37:00 Speaker 3

इसलिए समझ गया क्योंकि हम

00:37:02 Speaker 1

खुद जी जी जी मेरे घर में

00:37:05 Speaker 3

बच्चा है

00:37:05 Speaker 1

जी जी इसलिए समझ गया

00:37:06 Speaker 3

जी हम

00:37:07 Speaker 1

उसको नहीं समझ नहीं पाते बिल्कुल बिल्कुल जी आप क्या कहना चाहेंगे। इस तरह से मॉड्यूल बनना चाहिए कि नहीं बनना चाहिए

00:37:13 Speaker 2

जी जी मैं इनके पास

00:37:14 Speaker 1

सहमत हूँ जी जी, ठीक है मैं फिर आपका आज का इंटरव्यू

00:37:18 Speaker 1

एंड करता हूँ यहाँ पे आपकी परमिशन के साथ आप लोगों का बहुतबहुत धन्यवाद, शुक्रिया

---

Audio file

[Parents 4.m4a](#)

Transcript

00:00:02 Speaker 1

गुड मॉर्निंग, मेरा नाम अनुज श्रीवास्तव है, आज सेवेंटीथ ऑफ सितम्बर 2025 को मैं दो मैडम जिनका नाम सबीना खातून माम् है और कसूर रियाज माम् है, कौसर रियाज माम् है।

00:00:16 Speaker 1

उनसे अपना डेटा कलेक्ट करने जा रहा हूँ जिसमें साइको सोशल चैलेंजेस इंटरव्यू स्केड्यूल है। और सबसे पहले मैं कौसर रियाज माम् से पूछना चाहूंगा कि क्या इस बात की परमिशन देती हैं कि मैं उनकी ऑडियो रिकॉर्ड कर सकूँ?

00:00:27 Speaker 2

जी मेरी तरफ से परमिशन जी।

00:00:30 Speaker 1

सबीना खातून माम् आप जी जी, ठीक है सो मेरे कुछ 30 क्वेश्चन हैं।

00:00:37 Speaker 1

ओके दो पेरेंट्स हमारे साथ और जुड़े हैं, जिनमें से वसीम खान सर और फहीम खान सर हैं। वसीम साहब साहब से मैंने परमिशन लेना चाहूंगा ताकि मैं उनकी ऑडियो रिकॉर्डिंग कर सकूँ। जी।

00:00:52 Speaker 1

और फहीम खान सर से भी मैं परमिशन लेना चाहूंगा ताकि मैं उनके ऑडियो रिकॉर्डिंग कर सकूँ। परमिटेड क्या क्वेश्चन है? वसीम सर से अपने बच्चों को प्रतिदिन कोई काम कराने में या पढ़ाई कराने में, पढ़ाई वगैरह पूरी कराने में आपको कुछ कौन कौन सी कठिनाइयों का सामना करना पड़ता है?

00:01:11 Speaker 3

बच्चा हमारा समझता ही नहीं है। पढ़ाई के बारे में जो भी कुछ उसको किसी भी काम के लिए कहते हैं, वो उसकी मतलब अटेंशन है ही नहीं। किसी भी काम में ऑलमोस्ट लगभग ना के बराबर ही।

00:01:22 Speaker 1

है।

00:01:23 Speaker 3

वो केवल वही काम समझता है या समझती है हमारी बच्ची जैसे की उसको खेल से रिलेटेड हो, बोल लेकर आओ बोल लेकर आ जाएगी।

00:01:31 Speaker 3

कुछ खाने पीने का आइटम पानी की बोतल लाओ शरीर में ऐसे तो फ्रिज खोल के पानी की बोतल ले आयेगी, थ्रूटी की बोतल ले आयेगी ये उससे बोलो कटोरी ले आया ऐसे काम तो करते है उसे बोलेंगे पढ़ने को वो किताब विताब को फेंक देती है उसको मतलब इंटेरेस्ट ही नहीं है।

00:01:44 Speaker 1

पढ़ाई में नहीं है आपका?

00:01:46 Speaker 2

मेरा बेटा है वो।

00:01:49 Speaker 2

मतलब ये है की अपना मूड के हिसाब से वो कर लेता है, होमवर्क जरूर करता है लेकिन अपने मूड के हिसाब से करता है जब उसका मूड होता।

00:01:55 Speaker 1

है।

00:01:55 Speaker 2

तो ये होता है की पहले वो अपनी जो मतलब डेली का अपना एंटरटेनमेंट है। बट?

00:01:58 Speaker 1

वो लेकिन आपके सामने प्रॉब्लम आ रही है। मूडीनेसा

00:02:02 Speaker 2

तो उस टाइम पे नहीं करेंगे जीस टाइम पे मैं कहूँगी अपने मूड के हिसाब से करता है वो।

00:02:06 Speaker 1

ठीक है।

00:02:07 Speaker 4

आपका।

00:02:08 Speaker 1

क्या?

00:02:08 Speaker 4

मूड के हिसाब से ही करता है और पहले तो थोड़ा पढ़ता भी था, सुनता भी था अभी इधर चारपांच महीने से देख रही हूँ बिल्कुल पढ़ाई से कोई मतलब ही नहीं है उसे।

00:02:17 Speaker 1

बट जैसे आपने कई बार बोला कि मूड नहीं है उसका बट आपको फिर भी पता है पढ़ाई करानी है। तब आपने बोला कि नहीं? बच्चे पढ़ो दैट उसके टाइम उसका बिहेव्यर।

00:02:24 Speaker 5

कुछ।

00:02:25 Speaker 2

बहुत वही होता है, इरिटेटिंग होता है, बहुत मुश्किल से बैठता है, बैठ जाता है, लेकिन बहुत मुश्किल से इतना उसका मतलब इंटेरेस्ट है उस टाइम पे नहीं होता।

00:02:32 Speaker 1

है, ज्यादा देर तक भी नहीं बैठ पाते।

00:02:33 Speaker 2

नहीं, जब उसका इंटेरेस्ट होता है तभी बैठता।

00:02:36 Speaker 5

है। जी आपका यही है सेम कंडीशन अपने मूड के हिसाब से ही है, अपनी मर्जी से सब कुछ कर लेता है।

00:02:43 Speaker 5

और जब हम उसको चीज़ बोलते हैं तो वो नहीं करेगा। जब मूड होगा तो वो सारी चीज़ करता है।

00:02:47 Speaker 1

ठीक है, मेरा दूसरा प्रश्न है, जब आप अपने बच्चे की, उसके लक्ष्य के अनुसार उसके क्षमता के अनुसार जो उसकी क्षमता है, जो उसकी स्ट्रेंथ है, जितना वो कर सकता है, उसकी क्षमता के अनुसार कोई लक्ष्य को तय करते हैं, तब आपको कोई कठिनाई का सामना करना पड़ता होगा।

00:03:02 Speaker 3

कम रहता है, थोड़ा कर तो लेता है लेकिन फिर भी डाइवर्ट हो जाता है। मैएंड उसका अटेंशन नहीं है, कमडेबल नहीं है। वो फुल्ली कमेंड फॉलो नहीं कर पाता, हमारा बच्चा उसको समझाना पड़ता है। मानलो किसी डायरेक्शन में भेजना है तो हो सकता है अवॉइड ही कर जाये आपकी बात को।

00:03:16 Speaker 1

अच्छा अच्छा

00:03:17 Speaker 3

तो उसको हमें लालच दे करके कुछ

00:03:19 Speaker 3

जो टॉफी देंगे या सूजी देंगे या कुछ दुकान में ले जाएंगे, उसको घूमने का बड़ा शौक है।

00:03:24 Speaker 1

अच्छा

00:03:25 Speaker 3

चलो तुम्हें स्कूटी पे घुमाना है तो वो कुछ काम में इंटेरेस्ट।

00:03:29 Speaker 1

है मैं सब मोटिवेशन देने से वो भी एक स्ट्रेटेजी।

00:03:32 Speaker 3

है। बिल्कुल हम वही फॉलो करते हैं जी।

00:03:36 Speaker 1

जी बहुत अच्छा करना है। आप जी आप बताइए।

00:03:38 Speaker 2

वो मेरे बेटे का भी इस मामले में यही है। वैसे तो ज्यादातर वो सुन लेता है कोई भी अगर मैं उससे कुछ काम करूँ, कोई छोटा मोटा टास्क घर में जैसे कुछ भी करना है सुना

00:03:46 Speaker 1

लेता है मतलब सुन के करता भी है राइट।

00:03:48 Speaker 2

हाँ, कर लेता है, हाँ।

00:03:49 Speaker 1

जी।

00:03:49 Speaker 2

ज्यादातर उसका ये है कि वो मान लेता है।

00:03:51 Speaker 1

जी जी, बट उसको मोटिवेट मतलब किसी चीज़ का जोड़कर।

00:03:53 Speaker 2

हाँ होता है। मुझे कभी जैसे होता है कि मैं तुम्हारा मोबाइल बैन कर दूंगी, तुम्हें बिल्कुल नहीं टैच नहीं करना। अच्छा।

00:03:58 Speaker 1

ठीक है।

00:03:59 Speaker 2

या फिर ये होता है कि पापा से तुम्हारी कंप्लेंट हो जाएगी?

00:04:01 Speaker 5

ठीक।

00:04:02 Speaker 1

है।

00:04:02 Speaker 2

तो कभी तो होता है की उसका वो मतलब फॉरिन सुन लेता है। कभी जब उसका मूड नहीं होता है तो फिर मुझे मुझे उसे थोड़ा ये बोलना है की मैं तुम्हारी कंप्लेंट कर दूंगी। तुम्हारी ये चीज़ें बंद हो जाएँगी।

00:04:10 Speaker 1

हाँ, वो सबा।

00:04:10 Speaker 2

हाँ, वो सुनता।

00:04:11 Speaker 1

है वो भी रेस्ट्रिक्शन स्ट्रेटेजीज है। अच्छा है की आप लोगों को कम से कम गंभीर है क्यों की आपके बच्चों को आपका टाइम अपने लिए शादी तो आपको मालूम चल रहा है, स्कूल में ही आ रहे है तो आपको थोड़ा बहुत ये नॉलेज हो गयी है की किस तरह से करना है।

00:04:21 Speaker 1

बट वही है कि जो इनिशियल पेंट्स होगा तो उनको प्रॉब्लम हो रही है कि भैया क्या कर कैसे करें इज़ैक्टली चलिए आप बताये जी।

00:04:28 Speaker 4

किसी चीज़ का लालच भी तो कर लेंगे, पढ़ाई नहीं करेंगे लेकिन घर में कोई काम बोल दो तो वो कर देंगे।

00:04:33 Speaker 1

अच्छा पढ़ाई कुछ हाँ पढ़ाई।

00:04:34 Speaker 4

कुछ हो।

00:04:35 Speaker 5

अरे नहीं, नहीं, पढ़ाई में बहुत कम है, लेकिन और चीज़ों में एक्टिव है।

00:04:39 Speaker 1

अच्छा।

00:04:39 Speaker 5

दंगा बहुत करता है मजाक हर किसी आदमी को छेड़ता है।

00:04:43 Speaker 1

अच्छा।

00:04:44 Speaker 5

कोई भी हो सब उसी के साथ मजाक करता है।

00:04:46 Speaker 1

अच्छा तो फिर अगला है मेरा प्रश्न जैसे आपके बच्चे को किसी संरक्षित गतिविधियों मतलब कुछ जो शेड्यूल काम है जैसे मैं बोल रहा हूँ कि बेटा यही करो, है ना जैसे कि मान लो कि।

00:04:57 Speaker 1

चित्रकारी करने को।

00:04:58 Speaker 5

या कुछ भी दो।

00:04:59 Speaker 1

दो कि भाई यही करना है। इस वक्त आधे घंटे के लिए तो उसमें कुछ कठिनाई का सामना करना पड़ता है।

00:05:03 Speaker 3

हाँ, ये तो है कमाण्डबल तो बिल्कुल नहीं है।

00:05:06 Speaker 1

मतलब अगर ऐसा बोलू तो फिर वो नहीं करते।

00:05:08 Speaker 3

नहीं कमान्ड तो बिल्कुल नहीं है वो अगर हम उसे मोटिवेशन के थ्रू करा सकते हैं कमान्ड को वो फॉलो ही नहीं करता है। अच्छा आपका भी।

00:05:16 Speaker 2

अगर ये होता है की मुझे ये करना मुझसे करवाना है, मैंने कहा ये करना है तुम्हें इस टाइम में करना है तो मतलब ये है की किसी तरह से मजबूर हो के जब मैं सख्ती उस पर करती हूँ तो किसी तरह से मजबूर हो के कर ले, मैं उसकी कोई और बात नहीं सुना

00:05:28 Speaker 1

सकती मतलब खाली आवाज से।

00:05:29 Speaker 2

हाँ हाँ, नहीं जी कोई मारपीट नहीं हाँ मतलब।

00:05:32 Speaker 2

मतलब दौड़ा।

00:05:33 Speaker 1

के बोला ताकि वो शायद।

00:05:34 Speaker 2

मैंने उससे बोला कि आपको ये करना है।

00:05:36 Speaker 1

हाँ।

00:05:36 Speaker 2

इसके बाद ही आपकी बात सुनी जाएगी। तब वो करने के लिए मजबूर हो जाता है।

00:05:39 Speaker 1



जी जी आपा

00:05:40 Speaker 2

नहीं मजबूर नहीं होता है मर्जी

00:05:42 Speaker 4

होती है जो भी

00:05:42 Speaker 1

तभी करेंगे जी आपका

00:05:43 Speaker 5

मूड की बात है हमारे वाले की अच्छा

00:05:46 Speaker 1

वैसे ही स्टार्टिंग की वजह

00:05:47 Speaker 5

से मन किया तो करेगा नहीं तो उससे कोई ताकत नहीं है, जो करवा ले

00:05:52 Speaker 1

ठीक है। क्वेश्चन नंबर चौथा मेरा है जो अपने बच्चे के प्रयास की सराहना करने में कई बार वो अक्टिविटीज जो कर लेते हैं तो उसकी सराहना करने में भी कई बार होता है। ऐसे क्या होता है? इसमें प्रॉब्लम क्या है कि हम जब करते हैं तो बच्चे तक पहुँच पा रही है, नहीं पहुँच पा रही है, बच्चा समझ पा रहा है, नहीं समझ पा रहा है या फिर सराहना करने में हमने लेट कर दिया।

00:06:10 Speaker 1

या फिर सराहना करते हैं। गलत अक्टिविटी में वो इन्वॉल्व हो गया, तब तक हमने सराहना करते हैं। उसको लगता है चाहिए ये अक्टिविटी पे मेरे को सराहना मिल रही है तो इसमें कुछ कठिनाइयों का सामना करना पड़ता होगा।

00:06:18 Speaker 3

नहीं, इसमें तो खुशी होता है, मान लो किसी से अच्छा सराहना मतलब।

00:06:21 Speaker 1

एग्जैक्टली समझ रहे हैं।

00:06:22 Speaker 3

जब क्लैपिंग करते हैं तो वो बड़ी खुशी होती है तो उसको लगता है कि ये काम और कर दिया जाए।

00:06:25 Speaker 1

ठीक है, ठीक है, मतलब वो एंजैक्टली समझ रहे हैं हाँ

00:06:28 Speaker 2

वो भी अच्छे से समझ रहे हैं

00:06:31 Speaker 1

समझ जाते हैं जी आपके में हाँ

00:06:33 Speaker 5

ऐसे ही

00:06:34 Speaker 1

है। अच्छा समझ जाते मतलब कोई प्रॉब्लम इसमें नहीं आ रही है। आपको सामना नहीं करना पड़ा ठीक है। पांचवां प्रश्न मेरा है अपने बच्चों को अलग अलग तरीकों से, जैसे बोलकर, चित्रों से या हाथों से अपनी योग्यता।

00:06:48 Speaker 1

बताने में या दिखाने में कोई कठिनाई का सामना करना पड़ता हो। कई बार ऐसे बच्चे बोल नहीं पाते। स्पीच नहीं है तो फिर वो दूसरे तरीके से स्टार्ट करते हैं समझाने।

00:06:56 Speaker 3

को।

00:06:57 Speaker 1

हाँ, तो क्या कठिनाई आपको सीखाना भी आप क्योंकि आप उनको सीखा रहे हैं ना कि अब बोल तो पा नहीं रहे?

00:07:02 Speaker 3

हैं फिर आपको क्या करना है? मेरा बच्चा बोल नहीं पाता है, वो क्या करता है? इसको प्र्यास लगी है।

00:07:06 Speaker 3

वो पानी की तरह इशारा कर देगा, हमें टॅच करेगा, ऐसे ऐसे ठीक है, ठीक है, मान लो जैसे कोई पड़ोसी है उसको तो लगेगा। बच्चा नोच रहा है, वो नोच नहीं होता वो वो अक्चवली ऐसा है अटेंशन वो उसके पकड़ने की जो स्टाइल है, ग्रिप है वो थोड़ी सी वैसी होती है की

00:07:21 Speaker 1

डाइट।

00:07:22 Speaker 3

होती है।

00:07:24 Speaker 3

हर एक बच्चों को लगता है की इसमें नोच रही है तो अब मान लो किसी बच्चे के पास बैठी है, वो नॉर्मल के साथ वो नॉर्मल बच्चों को कुछ बोलेंगे। मान लो जैसे उसके पास टॉयज है, वो चाहेंगे मैं भी लेकिन वो बच्चा क्या बोलेंगे की ये मेरे को मार रही है। वो अपनी मम्मा से कंफ़्ट करेगा, मम्मा मेरी उसकी मम्मा मुँह बनाएगी।

00:07:41 Speaker 3

क्यों मार रही है? तुम्हारा बच्चा पागल है ये है वो तो थोड़ा सा ही मेंटली उसको उसको तो नहीं पता लेकिन हमें लगता है मैंने की ये इसके बच्चे का बेहवियर है क्योंकि डॉक्टर ने भी हमें ये बताया था की ये कुछ कहना चाहती है। बट ना तो आप ही समझ पाती हो आप तो चलो पेंट्स को कभी कभी समझ लोगे ना ये बच्चे के साथ इश्यू रहता है तो वो कैसे इर्रिट होता?

00:08:00 Speaker 1

है।

00:08:01 Speaker 3

क्योंकि वो बोल तो पानी रहा है और वो कह भी नहीं पा रहा है। वो इशारे से कहना चाह रहा है, आप भी नहीं समझ पाते हो। कई बार कई बार हमसे भी होता है की हम चूक जाते वो क्या कहना है, क्या दिया जा रहा?

00:08:10 Speaker 1

है।

00:08:10 Speaker 3

बिल्कुल क्योंकि पानी वगैरह तो चलो इशारे समझ लिया।

00:08:13 Speaker 1

बट कोई नई चीज मांग रहा है कुछ?

00:08:14 Speaker 3

नई चीज है या।

00:08:16 Speaker 1

मार्केट में।

00:08:17 Speaker 3

बैलून है या कुछ है, हम नहीं समझ पाते जी जी जी

00:08:21 Speaker 1

ठीक है मतलब कठिनाई तो ठीक

00:08:22 Speaker 3

है हाँ आपको बताना

00:08:24 Speaker 2

मुझे थोड़ा कम प्रॉब्लम होती है क्योंकि इतना ये है कि इसका स्पीच ऐसे तो प्रॉपर नहीं है, लेकिन ये है कि फिर भी वो बोल के काफी चीजें बता देता है और बाहर भी ऐसा नहीं कि घरा

00:08:31 Speaker 1

पे ही चीजें बट बाहर भी कभी हो कहीं जा रहा हो कहीं कुछ ऐसा हो जो एफडी

00:08:36 Speaker 5

सारी रिकॉयरमेंट ये चीज़ बोलता है

00:08:37 Speaker 2

बता देता

00:08:38 Speaker 2

अगर वो जो बता नहीं पाता है उससे रिलेटेड कोई ऑब्जेक्ट है, कोई पिक्चर है या फिर हाथों के इशारे से वो मुझे बता सकता?

00:08:44 Speaker 5

है अच्छा

00:08:45 Speaker 4

वो नहीं प्रॉब्लम नहीं, सही है सिर्फ थोड़ा

00:08:47 Speaker 2

अटकते बोलते

00:08:48 Speaker 5

हैं वो कोई भी चीज़ अपने

00:08:49 Speaker 2

हाँ, बता देगा

00:08:50 Speaker 1

ये

00:08:50 Speaker 2

चाहिए

00:08:51 Speaker 1

ठीक है आपके में

00:08:52 Speaker 5

सेम कंडीशन है, बोल लेता है, बस नए जो वर्ड होते हैं ना उन्हें नहीं बोल पाता बाकी वो सब चीज़ जिसकी

00:08:58 Speaker 5

जितना वो जानता है ना उसकी नॉलेज में वो चीज़ तो अच्छे से रिपीट करता है साहब

00:09:02 Speaker 1

अच्छा तो नए शब्द

00:09:03 Speaker 5

जो नए शब्द होते हैं ना जीस चीज़ों का वो नहीं रिपीट कर पाता वो

00:09:06 Speaker 1

अच्छा अच्छा

00:09:07 Speaker 5

और जब वो बोलता है ना मतलब जैसे उसने एक चीज़ सीख ली ना तो काफी समय तक उसी को वो रिपीट करता रहता है बार  
बार

00:09:14 Speaker 1

अच्छा

00:09:14 Speaker 5

एक चीज़ सीख ली ना तो रिपीट ही करता रहेगा

00:09:17 Speaker 5

किसी स्थिति का नाम पता लग गया, कुछ भी पता लग गया उसको वही रिपीट है, बस जी जी ऐसे करता हूँ

00:09:24 Speaker 1

ठीक है अगला प्रश्न मेरा छठवाँ प्रश्न है अपने बच्चों को दोस्त बनाने और दोस्ती बनाए रखने में किनकिन समस्याओं का सामना करना पड़ता है?

00:09:34 Speaker 3

दोस्तों को ऐक्चुली क्या है?

00:09:36 Speaker 3

खाने पीने की जो दोस्त है वरना वो अपनी दुनिया

00:09:40 Speaker 1

अच्छा मतलब दोस्ती बनाने में तो प्रॉब्लम है।

00:09:42 Speaker 3

प्रॉब्लम है, वो सोशली नहीं हो। पता है बच्चा हमारा की भाई अच्छा कुछ खाने पीने की चीज़ आपके पास है कुछ टॉयज है तो आपके पास आ जायेगा वो वो भी जब तक उसका मन है कई बार उसको खाना खिला रहे है बीच में रोट के चला जायेगा उसको जबरदस्ती।

00:09:56 Speaker 3

पकड़ के चलाना पड़ता है। हमें ये नहीं पता की उसका पेट भरा या नहीं हो रहा क्योंकि उसको भागना होता है की एक बार बन जाता है। बीच में तो ये भी एक प्रॉब्लम है।

00:10:06 Speaker 2

मेरा बेटा जो है वो इसिली लोगों से मिल लेता है।

00:10:08 Speaker 1

अच्छा दोस्ती वगैरह सब आसपास में भी, स्कूल में भी, कम्युनिटी में भी सब जगह पे दिन भर बाहर मतलब।

00:10:13 Speaker 1

बाहर भी खेलता है, स्कूल में नहीं।

00:10:15 Speaker 2

बाहर तो ऐसे नहीं जाता लेकिन आस पास के बच्चे मतलब वैसे दूर से उनका मतलब कम्यूनिकेट होता है। जैसे कहीं।

00:10:21 Speaker 1

पर रोज़ खेलने के लिए बच्चे बाहर निकलते हैं, 1 घंटे के लिए भी आते हैं।

00:10:23 Speaker 2

नहीं नहीं, बाहर का नहीं वो।

00:10:25 Speaker 1

जरूरी है। हाँ हाँ, नहीं, नहीं।

00:10:28 Speaker 2

दोस्ती कर लेते।

00:10:29 Speaker 1

हैं।

00:10:30 Speaker 4

चल नहीं पाता, इसीलिए मैं बाहर भेजती भी नहीं हूँ।

00:10:32 Speaker 4

थोड़ी चलने में प्रॉब्लम नहीं है। वीडियो थैरेपी।

00:10:34 Speaker 3

चलने का तो मेरी बच्ची के साथ इश्यू है क्योंकि वो थोड़ा बहुत शेक ही चलती है। अगर हल्का सा भी टच हो जाए तो गिरने का खतरा भी नहीं है। मेरे पास नहीं है मेरा बच्चे खेल रहे हो और वो।

00:10:46 Speaker 1

सब अच्छा लगा।

00:10:48 Speaker 3

रहा है तो चोटी लग जाएगी।

00:10:49 Speaker 1

उसकी।

00:10:50 Speaker 1

लेकिन चलिए कम से कम फिर भी इनको एक बार बाहर ले के जाएं आप साथ में रहें देन वापस भले ही ले आए थोड़ा सा बाहर।

00:10:55 Speaker 5

सेम कंडीशन है। चलने में थोड़ी प्रॉब्लम है ना तो कभीकभी पार्क में तो ले जाते हैं उसो।

00:11:00 Speaker 1

अच्छा ठीक है।

00:11:00 Speaker 5

बाकी वो ज्यादा किसी से इतना घर का तो सबसे वोरहता है।

00:11:04 Speaker 1

बट बाहर बाहर का नहीं जाता है, मतलब दोस्ती वगैरह भी मिलता है। ऐसा कुछ खास नहीं है।

00:11:10 Speaker 1

ठीक है, अगला प्रश्न है मेरा सातवाँ प्रश्न अपने बच्चों को सामाजिक कौशल सिखाने में जैसे घर में सामाजिक चीजें होती है ना उठना, बैठना, साथ में खाना बैठना, शेयर करना, मिलकर खाना राइट, एक दूसरे के साथ अपने बारी का इंतजार करना, एक दूसरे के साथ बारी का इंतजार करना, कई बार मिलकर खेलना, मिलकर काम करना।

00:11:29 Speaker 1

इसमें कोई काम करने में उनको कठिनाई का सामना करना पड़ता है और खासकर जब आप सीखा रहे हैं कि नहीं बेटा ये मिलके करो या फिर मिलके खाओ मिलके बांट के खाओ है ना तो वो थोड़ा सा समस्या आती है उसमें।

00:11:38 Speaker 3

है। समस्या रहती है क्योंकि वो उसकी मतलब एक गैरेंटी नहीं है की वो टिक के बैठे आपके साथ हम खा रहे हो या खेल भी रहे हो। मतलब खेल भी रहे हो उसकी पसंद का।

00:11:49 Speaker 3

तो उसके मतलब मूड के ऊपर है की वो बीच में से भी उसको पुट करके जा सकता है तो हम उसको फिर बुलाते है की उसकी मम्मी पकड़ कर आती है या उसका भाई पकड़ कर लेके आता है उसको ये पता है की भाई यहाँ सब खा रहे है वो चली जाएगी।

00:12:02 Speaker 1

अच्छा ठीक है आपका।

00:12:04 Speaker 2

मेरे भाई जो है ना काफी मतलब इस मामले में काफी समझदार है।

00:12:07 Speaker 1

अच्छा।



00:12:08 Speaker 2

शेयरिंग की बहुत ज्यादा आती है जैसे अपनी सिस्टर को शेयर करता है।

00:12:11 Speaker 1

और बाहर दोस्त वगैरा।

00:12:13 Speaker 2

अगर हम सोचेंगे कि उनसे शेयर करो तो वो शेयर करेगा।

00:12:16 Speaker 1

अच्छा खुद से इनिशिएट करते हैं कभी बच्चे।

00:12:18 Speaker 2

मतलब ये है मतलब वो काफी हद तक नॉर्मल है। अच्छा जैसे नॉर्मल बच्चा होता है ना?

00:12:24 Speaker 1

ठीक है, ठीक।

00:12:25 Speaker 2

है जी जी सही है।

00:12:28 Speaker 2

वो भी शेयर कर लेता।

00:12:29 Speaker 5

है जवा।

00:12:30 Speaker 2

उनका मूड हो तो।

00:12:31 Speaker 4

मूड नहीं है तो नहीं देगा।

00:12:32 Speaker 1

अच्छा।

00:12:33 Speaker 5

यही कंडीशन है मूड के ऊपर है, बाकी नॉर्मल रहता है, वो ऐसे हाइपर नहीं है, किसी चीज़ में मिलके खेलते हैं। हमारे वाले बच्चे के अंदर तो ये कंडीशन है वो देखने में मतलब नॉर्मल सा लगता है बस उसे ना चीज़ों की सही समझ नहीं है।

00:12:47 Speaker 5

कैसे क्या करना है बाकी खाना पीना सारा वो सब कुछ अपना कर लेते।

00:12:52 Speaker 1

है। मिल बांट के कर लेते है।

00:12:53 Speaker 5

हाँ सब एंड।

00:12:54 Speaker 1

देन अगला प्रश्न आठवां प्रश्न आपके बच्चा जब कोई समूह गतिविधियों में खेल रहा है, ऐसे ग्रुप अक्टिविटीज जब कई बार हमारी होती है उसमें वो पार्टिसिपेट कर रहा हूँ। खेल रहा हूँ मिलके राइट ऐसी बहुत सारी चीज़ें होती हैं, हम ग्रुप में कराते हैं।

00:13:07 Speaker 1

इसमें कोई कठिनाई का सामना करना पड़ता है और आपको बताना पड़ेगा कि नहीं। ग्रुप में खेलो मिल के खेलो इनिशियला

00:13:13 Speaker 3

तो थोड़ी दिक्कत थी लेकिन जब यहाँ से आए हैं ग्रुप में हुए हैं तो थोड़ा थोड़ा वो

00:13:16 Speaker 1

स्कूल में आने की वजह?

00:13:18 Speaker 3

से थोड़ा सा।

00:13:19 Speaker 1

वैसे क्या है मतलब? वो खेल पाते नहीं खेलते।

00:13:21 Speaker 3

हाँ, वो तो खेद ही अलग रहता है चीज़ें फेंकना ये करना, वो खेलना।

00:13:26 Speaker 1

आपा

00:13:28 Speaker 2

ये है की वो अब जैसे ये बाहर तो जाता नहीं है लेकिन अपने जैसे कज़िन्स है अब वकेशंस में इकट्ठे होते है सब लोग खेलते है मिलके ये मैंने स्कूल में भी देखा है तो ग्रुप में वो मतलब अक्टिव रहता

00:13:43 Speaker 4

है।

00:13:43 Speaker 1

अच्छा थोड़ा गुस्सा जल्दी आ

00:13:45 Speaker 4

जाता है।

00:13:45 Speaker 1

ग्रुप में।

00:13:46 Speaker 4

खेलता है लेकिन फिर ज्यादा देर नहीं 5 मिनट ही खेलेगा, हट जाएगा वो।

00:13:50 Speaker 1

अच्छा मतलब एकदम से अलग हो जाएगा हाँ।

00:13:52 Speaker 4

एकदम से अलग हो जाएगा।

00:13:55 Speaker 5

यही है ये ग्रुप में मतलब ज्यादा देर नहीं है।

00:13:58 Speaker 1

अच्छा।

00:13:58 Speaker 5

झेल लेगा लेकिन ये पता नहीं थोड़ी देर।

00:14:03 Speaker 5

मूड की बात है।

00:14:04 Speaker 1

अच्छा अपने बच्चे को सहयोग का महत्व समझाने के लिए की भाई मिल कर खेलो, क्योंकि इस पिछले वाले से रिलेटेड है। ये सहयोग का महत्व समझाने के लिए इम्पोर्टेंट है। आप लोग किस तरह से बोले मोटीवेट करते है की नहीं? बेटा मिल कर खेलो तो उसमें आपको कई बार कठिनाई का सामना करना पड़ता है। समझ पता है नहीं समझ पता है वो है ना?

00:14:19 Speaker 3

बहुत ज्यादा कठिनाई क्योंकि वो समझ ही नहीं पाता की।

00:14:22 Speaker 3

एक जगह रहना है उसको के बच्चे आते हैं वो जैसे नोचने वाला होता है बच्चों को लगता है की कभी कभी नोच भी लेती है वो बच्चों को।

00:14:29 Speaker 1

हाँ, वो नहीं चाहते क्योंकि ऐसे इनवॉल्टरी है ना उसके लिए स्ट्रिप है, अक्चवली टाइट हो चूका है।

00:14:34 Speaker 3

एजैक्टली।

00:14:35 Speaker 1

तो वो उसकी वजह से वो सब वो हाथ में अक्टिवेट करेंगे तो थोड़ा सा ये होगा अच्छा आपका वो।

00:14:42 Speaker 1

ये ये था कि समूह गतिविधियों, बच्चों के साथ सहयोग का महत्व समझाने के लिए आपको किन कठिनाई का सामना करना पड़ता है मुझे ये।

00:14:48 Speaker 2

ज्यादा मुश्किल नहीं होती है।

00:14:49 Speaker 1

अच्छा मतलब वो ग्रुप में आप बता रहे है खेलो तो क्या होता है जी आपका मैं ग्रुप में?

00:14:54 Speaker 4

खेल लेता है।

00:14:54 Speaker 1

खेल लेते है। बट आपने इससे पहले बताया था कि थोड़ा बहुत कभी भी हाँ।

00:14:57 Speaker 4

वो

00:14:58 Speaker 4

खेलता है लेकिन उनकी मर्जी है वो छोड़ के भी भाग सकता है बीच से

00:15:01 Speaker 1

हाँ

00:15:01 Speaker 4

तो ये नहीं की लास्ट तक टीका रहेगा

00:15:03 Speaker 1

नहीं उसमें आप समझाएंगे ना की लास्ट तक टिके रहो, मिल के खेलते रहो तो फिर आपको कई बार संस्थान का सामना कोई समझा

00:15:09 Speaker 4

नहीं मानेगा वो छोड़ दिया, बीच में से तो छोड़ दिया

00:15:12 Speaker 1

अच्छा अच्छा जी आपके में

00:15:14 Speaker 5

जी, वो

00:15:15 Speaker 5

खेल ग्रुप में

00:15:16 Speaker 1

ग्रुप में अक्सीडेंट जी दसवां प्रश्न है मेरा जब आपका बच्चा साथियों द्वारा अस्वीकृति या गलतफहमी का शिकार हो जाए, कई बार होता है ना अस्वीकृति भाई हमारे साथ मत खेलो, हमारे साथ इन्वॉल्व मत हो, हमारा मत खड़े हो है ना? कई सारे कम्यूनिटी में आपको देखने को देख लेता है तो उस टाइम पे आपको क्या क्या कठिनाई का सामना करना पड़ता है

00:15:34 Speaker 3

बच्चा कभी कभी रोता भी है। अब जैसे मान लो बच्चे खेल रहे हैं और फिर उसको फिर मुझे कहीं बाहर ले जाना पड़ेगा या दूसरा टॉय या ऐसा करना पड़ेगा ताकि खुश हो जाये वो?

00:15:45 Speaker 1

जी जी आपके ना?

00:15:47 Speaker 2

मुझे भी उसको समझाना पड़ता है। कई बार ऐसा होता है कि मतलब आपस में बहन भाई खेल रहे हैं वो लोग।

00:15:51 Speaker 2

तो हो जाता है छोटी बेटी है तो थोड़ा रीटेड हो जाती है, वो उसे मना करती है। तुम भी आपस में लड़ाई होती मुझे उसको समझाना पड़ता है। कई बार होता है कि वो मान जाता है। मैं उसको किसी और चीज़ में इन्वॉल्व कर देती हूँ।

00:16:03 Speaker 1

अच्छा।

00:16:04 Speaker 2

तो वो हो जाता।

00:16:04 Speaker 1

है। जी जी आप?

00:16:06 Speaker 4

कई बार नहीं मानते।

00:16:07 Speaker 1

नहीं।

00:16:07 Speaker 4

देना पड़ता है वो कभी कभी मान भी जाता है।

00:16:10 Speaker 4

जब मूड ठीक हो तो समझा दो तो।

00:16:12 Speaker 2

समझा।

00:16:13 Speaker 4

जाएगा।

00:16:14 Speaker 1

अच्छा आपके में

00:16:15 Speaker 5

जी, वो खेलता

00:16:17 Speaker 1

है। अच्छा एंड देन ये आपका आपके बच्चों को पढ़ाई या दूसरी गतिविधियों में प्रेरित करने के लिए मोटिवेट करने के लिए मोटिवेशन देने के लिए एजैक्ट मोटिवेशन ऐसा होना चाहिए जो बच्चों को समझ में आया एजैक्ट में

00:16:29 Speaker 1

तो उसमें कुछ समस्याओं का सामना करना पड़ता होगा

00:16:32 Speaker 3

अभी तो समस्याएं आ ही रही हैं क्योंकि अभी तो उसको दो या तीन महीने हुए हैं यहाँ पर आए

00:16:37 Speaker 1

हुए

00:16:37 Speaker 3

बट लगता है कि लिटिल लिटिल प्रोग्रेस पॉसिबल है, बट बिकॉज वी अरे फेसिंग दी डिफिकल्टीज तो

00:16:45 Speaker 1

उसमें क्या प्रॉब्लम क्या से आती है? मतलब वैसे आपको?

00:16:47 Speaker 3

कुछ समझ ही नहीं पाता है बच्चों को

00:16:49 Speaker 1

जैसे आप मोटिवेट कर रहे हैं। मोटिवेशन मेरे को पता नहीं है जी जी

00:16:53 Speaker 3

केवल इंटरस्टेड वाला ही मोटिवेशन समझ पाता है जैसे खेल कूद या खाने पीने की है ही नहीं। इंटरस्ट, उसमें अपनी मॉम वगैरा के जीतने, क्लर्स वगैरह सब फेंक दिए

00:17:04 Speaker 1

अच्छा अच्छा

00:17:05 Speaker 3

किताब किताब वो

00:17:06 Speaker 3

बड़े भाई की किताब भी फाड़ देती है तो फिर एक बार हम नहीं रोते तो बड़ा भाई उसको मार भी देता है, लेकिन हम जैसे बोले की नहीं मारा, लेकिन हमें लगता है की उसने मारा कोई वो रोती है। हाँ

00:17:15 Speaker 1

हाँ हाँ, बिलकुल

00:17:16 Speaker 3

बिलकुल हाँ, तो बिलकुल वो भी छोटा है उसको

00:17:19 Speaker 1

हाँ, बिलकुल

00:17:20 Speaker 3

मतलब तुम भी नहीं कह सकते

00:17:22 Speaker 3

लेकिन वो कहता है मैंने मारनी बट वो मार रहा था, वो भी वो

00:17:26 Speaker 1

जी

00:17:26 Speaker 2

सर एक बार रिपीट करेंगे

00:17:28 Speaker 1

मेरा ये क्वेश्चन था कि बच्चों को प्रेरित करने के लिए चाहे पढ़ाई लिखाई में हो या किसी गेम में हो, प्रेरित करने के लिए आपको कई सारी कठिनाइयों का सामना करना पड़ता है। हाँ

00:17:37 Speaker 2

होता है कभी कभी मुझे

00:17:39 Speaker 2



क्योंकि ये होता है कि उसको मतलब पढ़ाने के लिए थोड़ा सा एफर्ट्स मुझे करने पड़ते हैं तो मुझे उसे बोलना पड़ता है कि आप अगर नहीं पढ़ेंगे तो कैसे रह जाएंगे? आपसे छोटी बहन है। देखो वो कितना अच्छा पढ़ रही है। ये सब चीज है तो मुझे उसे करना पड़ता है। एफर्ट्स मुझे करना ही पड़ते हैं उसके लिए।

00:17:52 Speaker 5

ठीक है, आप।

00:17:53 Speaker 4

ना ऐसे ही कहते।

00:17:54 Speaker 5

हो?

00:17:55 Speaker 4

माम् अक्सर उनका मूड होता है तो पढ़ लेते हैं, जैसे चित्र दिखाके पढ़ाऊँ।

00:17:59 Speaker 4

ये आपको पूरा समझ लो।

00:18:00 Speaker 1

वो तो चित्र रेखा के पढ़ाने का बट उसको आपको प्रेरित करना है ना कि पढ़ो अभी पढ़ो।

00:18:04 Speaker 4

नहीं मानेगा, उनकी मर्जी होगी तो वो पढ़ेगा नहीं। मर्जी है तो।

00:18:07 Speaker 1

मैं उसे।

00:18:08 Speaker 4

नहीं पढ़ा सकती।

00:18:08 Speaker 1

जबरदस्ती अच्छा अच्छा आपका मैं।

00:18:11 Speaker 5

यही कंडीशन है मूड के ऊपर है।

00:18:13 Speaker 1

पूरा मूड में आता

00:18:14 Speaker 5

है या तो खेलता है जब उसका खुद मूड होता है ना?

00:18:17 Speaker 5

तो वो खुद से अपनी पेंसिल बैग उठाकर लाएगा, पढ़ने बैठ जाएगा, जब तक मन होगा फिर वो खेल में लग जाएगा। अपने हमारा वाला ना अच्छी चीजें बहुत कम समझता है। तुम गलत हरकत कर दो, एक दम सीख जाता है। अच्छा ठीक।

00:18:31 Speaker 4

पढ़ाई लिखाई में

00:18:32 Speaker 5

जल्दी जी हाँ, कुछ डिश के सामने कुछ ऐसी गलत हरकत करो।

00:18:36 Speaker 5

जो हँसी मजाक हो वो एक दम कैछ कर लेता है, गलत चीज को अच्छी बहुत मुश्किल पकड़ता है। जी जी।

00:18:44 Speaker 1

प्रश्न नंबर 12 है मेरा अपने बच्चों की आलोचना करने से बचते हुए कई बार आपको भी आ रहा है की मैं इसकी आलोचना करूँ? फिर कई बार मुँह से निकल जाता तो बधाई या तू नहीं कर पा रहा तो कह रहा बेवकूफ है या कुछ भी चीजें हो सकती आलोचना को बहुत तरह की आलोचना होती है।

00:18:56 Speaker 1

चंदन उससे बचते हुए अपने आप को ध्यान रखते हो की नहीं, वैसा नहीं करना। आलोचना नहीं करना है और सिर्फ उसकी प्रगति पर ध्यान देते हुए आपको कुछ कठिनाई का सामना करना पड़ता है और।

00:19:06 Speaker 3

कई बार देखो बी अरे ह्यूमन्स नॉट एबल कई बार ऐसा होता है की हम बोल लेते है उल्टा सीधा क्योंकि उसने क्या रिपोर्ट फेंक दिया है अभी?

00:19:13 Speaker 3

मोबाइल।

00:19:14 Speaker 1

फ्रस्ट्रेशन आ ही जाता है वो जनरलली।

### 00:19:16 Speaker 3

अभी मोबाइल लेकर आया, उसने तोड़ दिया। दिमाग खराब हो जाता है किंतु तो पागल ही है। बिल्कुल हाँ बिल्कुल तो हाँ, भले ही मैं मारू लेकिन इतना स्टेशन नहीं है लेकिन उसको थोड़ी देर बाद लगता है की उसको पता ही नहीं है। जीजी तो रियलाइज होता है हमें।

### 00:19:31 Speaker 3

हालांकि उस टाइम पे तो हमने उसको बोल दिया उल्टा जी।

### 00:19:38 Speaker 2

हाँ, ऐसे ही होता है। दरअसल क्या है कि मैं सिंगल मतलब अकेली रहती हूँ, बच्चे होते हैं मेरे साथ तो मुझे सारी रेस्पॉन्सिबिलिटी घर पर बात भी होती है तो मैं कई बार बहुत ज्यादा भी हो जाती है। बहुत ज्यादा क्यों इतना?

### 00:19:52 Speaker 2

होता है की मैं मतलब उसको कभी कभी बोल देती हूँ ऐसा या फिर एक आध थप्पड़ भी लगा देती हूँ लेकिन हाँ बाद में होता है थोड़ा रियलाइज की अगर ये नॉर्मल होता तो ये ऐसा बिहेव नहीं करता। ये सब बच्चों की तरह नॉर्मल होता तो थोड़ा सा मुझे रिग्रेट होता है।

### 00:20:06 Speaker 5

जी जी।

### 00:20:06 Speaker 2

लेकिन यही कभी कभी करना पड़ता है।

### 00:20:08 Speaker 5

जी जी।

### 00:20:09 Speaker 1

आप क्या कहना।

### 00:20:10 Speaker 4

चाहेंगे?

### 00:20:10 Speaker 4

बहुत गुस्सा हो जाता है, मुझे भी गुस्सा आता है तो मैं भी मारती हूँ वैसे ही लेकिन मारने से और ज्यादा हक हो जाता है जैसे एक बच्चा होता है, जाता है ना सिमारत और चिन्हायेगा ये और तूर खोर मचाएगा और प्यार से समझाओ तो कभी तो समझ भी जाता है कभी नहीं भी समझता है।

00:20:25 Speaker 5

ठीका

00:20:26 Speaker 1

है।

00:20:27 Speaker 5

जी अगर कोई गलती कर रहा है और उसे डांट दिया।

00:20:30 Speaker 5

सही से डांट दिया तो वो नाराज हो जायेगा। जा के कमरे में लेट जाता है।

00:20:34 Speaker 1

अच्छा।

00:20:35 Speaker 5

उसे पता है कि डांट दिया, डर जाता है मतलब पिटाई हो गयी छुप जाता है।

00:20:40 Speaker 1

अच्छा।

00:20:40 Speaker 5

लेकिन थोड़ी देर बाद जब उसे कोई दिखता है, कोई मनाने नहीं आ रहा। खुद ही आ जाता है फिर वो डोर अच्छा।

00:20:47 Speaker 3

अच्छा।

00:20:48 Speaker 3

ज्यादा वो नहीं कर पाते ज्यादा बिल्कुल हाँ।

00:20:50 Speaker 1

ज्यादातर।

00:20:51 Speaker 3

रसायना में फीलिंग जो है एकदम ऐसी होती है पूरे है।

00:20:54 Speaker 5

शुद्ध है। मारने वाला तो समझता है सारी चीजों को इमोशन को और उसे फ़ोन दे दो ना, फ़ोन का तो कुछ भी दे दो, कैसे ही फ़ोन दे दो उसको चलाता है।

00:21:03 Speaker 2

जी जी।

00:21:03 Speaker 3

जी।

00:21:04 Speaker 2

फ़ोना

00:21:04 Speaker 5

तो उसे जो चीज़ चाहिए ही नहीं डांस का, किसी को उनको बोल के।

00:21:08 Speaker 5

ठीका

00:21:08 Speaker 1

है।

00:21:09 Speaker 5

मांगा लेते हैं क्योंकि उसकी मनमर्जी है।

00:21:10 Speaker 1

जी मैं समझ सकता हूँ अगला तेरहवां प्रश्न है मेरा अपने बच्चों की छोटी छोटी सफलताओं पे बार बार सकारात्मक चीजें बोलना मोटीवेट करना गुड वेरी गुड बहुत छोटी छोटी चीजों पे जब कर लेते हैं क्योंकि हम क्या होता है ना? बड़ी चीज़ करने पे ही हम ज्यादातर मोटीवेट होते हैं क्योंकि हम सोचते हैं की एस एक्स्पेक्शन के रखते पड़ोसी का कहीं से कर लिया।

00:21:26 Speaker 1

बट ये बच्चा छोटा चीज़ भी कर ले तो इनके लिए भी बहुत बड़ा टास्क होता है तो छोटी छोटी चीजों को प्रेरित करने में या है ना? प्रोत्साहित करने में आपको कुछ कठिनाई का सामना करना पड़ता हो। आप उस डीटेलिंग को नोट कर पाते हैं की नहीं कर पाते।

00:21:37 Speaker 3

नहीं, वो तो फिर छोटे छोटे हम उसको एंकरेज करते हैं इन चीजों को और उसकी टाईड टु टाईमा

00:21:44 Speaker 3

तारीफ भी करते है तो वो थोड़ा समझता वहाँ भी ये मेरी तारीफ हो रही है तो उस चेहरे पे भी क्यूटनेस आती है, स्माइल आती है।  
जी जी जी।

00:21:54 Speaker 2

जी मैं उसकी जरूर तारीफ करती हूँ जो पॉजिटिव चीज़ होती है और जो मुझे लगता है की हाँ मैं उसको जरूर मतलब बहुत अच्छे से करती हूँ।

00:22:03 Speaker 1

जी जी जी।

00:22:05 Speaker 4

ऐसे ही तारीफें करने से खुश हो जाएगा। फिर से दोबारा से वो काम करेगा।

00:22:09 Speaker 1

अच्छा।

00:22:09 Speaker 4

बहुत खुश होता।

00:22:12 Speaker 5

हो जी देखिए थोड़ा कभी समझ भी जाता है कभी नहीं भी समझता है बट वही कि हर पूरी चीज़ समझता है। हर छोटी चीज़ ऐसा नहीं कि हमने उसकी तारीफ की और वो समझ गया नहीं।

00:22:21 Speaker 4

समझ जाता है तारीफ करो तो वो बहुत खुश है।

00:22:23 Speaker 4

समझ।

00:22:23 Speaker 5

जाता है आपका लेकिन हाँ कभी समझ भी जाता है कभी नहीं भी आता है अपना ठीक है ये नहीं कि मतलब हर चीज़ हमसे कहीं मेरे को समझ जाये तो बात ही क्या है?

00:22:32 Speaker 1

हाँ जी जी, चौदहवां प्रश्न है, मेरा अपने बच्चों की असफलता के बाद भी कई बार कुछ काम दिया हुआ है असफल हो गया उस चीज़ में।

00:22:39 Speaker 1

मान लीजिये कि किचन से पानी लाने को बोला वही गिलास गिर गया या कुछ भी हो गया तो असफलता कई बार मिल जाती है देन उसके बाद नया कार्य को देने में क्योंकि डर लगता है ना फिर अगला फिर दोबारा उसको वही काम दो तो उसमें कुछ कठिनाई का सामना करना पड़ता है।

#### 00:22:50 Speaker 3

उसमें वो तो कठिनाई नहीं होती। ऑब्बियस्ली की भाई कोई काम बिगाड़ दे ऐसे लगता है की दोबारा भी काम ना बिगाड़ दे। इसको रहना बेकार है। जी।

#### 00:22:57 Speaker 1

जी आप कह रहे है।

#### 00:22:58 Speaker 2

नहीं अगर जैसे कुछ भी काम है तो मैं उसको बोलेंगे अगर उससे खराब हो भी गया है तो ये होता है की नेक्स्ट टाइम फिलहाल तो मैं उसको कहती हूँ की तुमने इस तरीके से कराया, लेकिन मैं रिस्क ले लेती हूँ क्योंकि जब तक मैं उसे नहीं कहूँगी तो वो सीखेगा कैसेस जी तो इसलिए मैं उसको मतलब वो टास्क दुबारा रिपीट कराती रहती।

#### 00:23:13 Speaker 1

हूँ जी।

#### 00:23:14 Speaker 4

मैं ये रिपीट कराती हूँ अगर कोई चीज गिर जाएगा उससे।

#### 00:23:17 Speaker 4

वो सॉरी भी बोलेंगे, उठा के भी लाएगा, अच्छा अच्छा उठा लेता है, फिर दोबारा कोशिश करेगा कि ये मैं सही से करूँ।

#### 00:23:23 Speaker 5

सेम कंडीशन है। अगर गलती हो जाती है तो सॉरी बोलता है वो अपनी मम्मा से मतलब उसकी मम्मा कहती है नाराज होने का वो दिखाती है उसे तो वो समझ जाता है कि मम्मा नाराज है, फिर वो बार बार सॉरी सॉरी करता रहेगा जी।

#### 00:23:35 Speaker 1

जी ठीक है।

#### 00:23:37 Speaker 1

पन्द्रहवाँ प्रश्न मेरा है अपने बच्चों को धैर्य और सकारात्मक सोचने के लिए प्रेपर करना ना की भाई पॉजिटिव रहो लाइफ में और अच्छा धैर्य आये आपको कुछ भी चीजें नहीं मिली तो कोई बात नहीं। धैर्य के साथ शांति या तो उसको एक्सेप्ट करोगे नहीं है ये सब चीजें तो ये सब चीजों का उदाहरण बनने के लिए आपको कुछ समझाना पड़ता हो, तब डिफिकल्टी होती हो।

00:23:57 Speaker 3

उसमें धैर्य है ही नहीं, इम्पल्सिव रहता है।

00:24:01 Speaker 1

तो फिर वह सकारात्मक बनने के लिए भी।

00:24:04 Speaker 3

बहुत ज्यादा कठिन नहीं है क्योंकि इन बच्चों के साथ ये थोड़ा सा इश्यू रहता है कि इनके अंदर।

00:24:08 Speaker 2

पेशेंस नहीं।

00:24:09 Speaker 3

होता पेशेंस होता ही नहीं है।

00:24:11 Speaker 3

एक तो इम्पल्सिव होते हैं, लोगों को दिक्कत है।

00:24:14 Speaker 1

जी जी आपका कहना।

00:24:15 Speaker 2

है नहीं, मैं तो उसको अगर उसे कोई चीज चाहिए तो तुम अभी थोड़ा सा मतलब रुक जाओ। ये है किसी भी चीज के लिए पेशेंस बहुत जरूरी है, हालांकि उसमें है नहीं।

00:24:25 Speaker 2

अगर उसे यह लग गया कि मुझे यह ट्राय लेना है तो मैं मुझे भी जिद हो जाती है कि नहीं? मैं अभी नहीं दिलाऊंगी मैं दिलाऊंगी तो अपनी बात यह है कि मैं उसको यह उस टाइम पे नहीं पेशेंस रखो। इससे उसमें यह चीज आए की नहीं तो मैं थोड़ा सबर रखूंगी। तो मैं यह कोशिश करती हूँ कि नहीं इसमें पेशेंस आए जी।

00:24:41 Speaker 5

जी जी।

00:24:41 Speaker 2

हाँ, मेरी कोशिश यह रहती।

00:24:42 Speaker 4



है। जी हाँ जी, इसलिए

00:24:44 Speaker 4

जैसे अभी मांगा तो बता दो थोड़ी देर बाद ला दूंगी, कभी तो मान भी जाता है कि शाम हो जाएगी तो लाएगी फिर वो भूलेगा नहीं, बारबार उस चीज़ को मांगेगा, 2 दिन तक उसे रटते रहेंगे। अच्छा फिर लाके दूँ, फिर वो शांत हो जाएंगे।

00:24:59 Speaker 1

अच्छा अच्छा आपके

00:25:00 Speaker 5

में जी जो चीज़ चाहिए उसको रिपीट करता है, ज़िद करता है उसकी।

00:25:03 Speaker 1

अच्छा अच्छा तो मतलब वो

00:25:05 Speaker 1

रहेगा ठीक है देन मेरा सिक्सटीन्थ प्रश्न है सोलहवां अपने बच्चों को उसकी भावना पहचानने में, क्योंकि भावना एक ऐसा शब्द होता है जो कि छोटे से लेकर बहुत बड़े तक होता है। छोटा बच्चा होता है, जब पैदा होता है तो रोना और

00:25:16 Speaker 1

उसको हसना। ये दो भावनाओं उनके अंदर होती है पर धीरे धीरे हमारे अंदर बहुत सारी भावनाओं डेवलप होती जाती है। लास्ट तक हमारे अंदर ईशा तक की भावना आ जाती है। बड़े होने की तो ऐसी भावनाओं को समझने में और उसको कंट्रोल करने में है ना तो उसमें आपको कई सारी कठिनाई का सामना करना पड़ता।

00:25:32 Speaker 3

है। हाँ ऑब्बियस्ली इसमें थोड़ी दिक्कत आती है।

00:25:35 Speaker 3

क्योंकि उसकी इमोशन्स कुछ तो हम समझ पाते हैं बट सारी ये समझता है।

00:25:40 Speaker 1

इमोशन्स वो बता पाते हैं एक्सप्रेसिव में।

00:25:42 Speaker 3

वो बोली बात है तो थोड़ी दिक्कत है स्पीच में।

00:25:44 Speaker 1

वो ड्राइंग, ड्राइंग, उसके थ्रू ड्राइंग

00:25:46 Speaker 3

भी नहीं आती

00:25:47 Speaker 1

है

00:25:47 Speaker 3

खाली इशारे से ही बता देता है। ये कुछ करके बोलता है मानो जैसे भूख लगी है तो हॉटपॉट ले आएगा। कभी इसका मतलब नहीं है, कुछ छीना होना चाहिए।

00:25:54 Speaker 1

उसकी अक्टिविटीज।

00:25:56 Speaker 3

हाँ

00:25:56 Speaker 5

जी।

00:25:57 Speaker 2

सर एक बार रिपीट।

00:25:58 Speaker 1

जैसे बच्चों को उसकी भावना पहचानने में आप उसको मदद कर रहे हैं देन आपको कोई कठिनाई का सामना करना पड़ता हो।

00:26:06 Speaker 2

कभीकभी होता है तो ज्यादातर तो ये होता है कि वो समझ में आ जाता है।

00:26:11 Speaker 1

जैसे आप बच्चे को मान लीजिये कि एंगर का एक भावना आ गई।

00:26:13 Speaker 2

है हाँ, हाँ

00:26:14 Speaker 1

गुस्सा हो रहा है देन आप समझा रहे है उस टाइम पे देन आपको कई पटनायक का सामना करना पड़ता होगा।

00:26:18 Speaker 2

तो मैं उसको समझाती हूँ, के नहीं ये।

00:26:20 Speaker 1

समझ जाते है वो एंजैक्टली।

00:26:21 Speaker 2

हाँ, ऐसा समझ जाते है। कभी कभी रेली ऐसा होता है की नहीं समझता है।

00:26:25 Speaker 1

अच्छा।

00:26:25 Speaker 2

चाहे में उसे प्यार से समझाऊ चाहे गुस्से से समझाऊ जी फिर भी समझ जाता है।

00:26:29 Speaker 1

जी आप जी समझ जाता है समझ जाते है मतलब अगर एंगर वगैरा आया कुछ भी आप।

00:26:33 Speaker 4

कुछ अगर।

00:26:34 Speaker 4

मैं बता दूँ कि अभी मुझे काम है, थोड़ी देर बाद लाके दे दूंगी, समझ जाएगा और कभी नहीं भी समझेगा, कभी तोड़फोड़ मचा देगा। बहुत ज्यादा शोर करने लगा, अभी चाहिए तो चाहिए जीजी और कभी मान भी जाता है।

00:26:45 Speaker 1

जी आप समझ जाते हैं जो भी चाहिए वो सब कुछ हो जाएगा। अच्छा ठीक है, उन्नीसवां प्रश्न है।

00:26:54 Speaker 1

नहीं सॉरी सत्तीमा प्रश्न है अपने बच्चों के भावनाओं को सवस्थ तरीके से या सही तरीके से व्यक्त करने में ठीक है। उसमें आप प्रोत्साहित करते हो कि बेटा जैसे दुखी हो तो बता पाओ यार, है ना? किसी भी तरह से एक्सप्रेस कर पाओ, हमारे पास से पहुंचा पाओ तो इसमें कई बार कठिनाई का सामना करना पड़ता हो। आपको कि मैं ऐसा टीज कर रहा हूँ खासकर भावनाओं पढ़ा रहा हूँ।

00:27:13 Speaker 1

की भाई, जब कभी आप दुखी हो जैसा बिहेव्यर आपका आ रहा है, सैड हो जा रहे हो तो मेरे को इग्जैक्टली आके तुम बता पाओ की भाई तुम दुखी हो, परेशान हो तो उसमें कई बार कठिनाई का सामना करना पड़ता।

00:27:23 Speaker 3

है हाँ, ये थोड़ा सा परेशानी है क्योंकि वो प्रॉपर नहीं बता पा रहा कोई इश्यू।

00:27:27 Speaker 1

मतलब कोई इमोशन्स को एक्सप्रेस करने के लिए कुछ ना।

00:27:30 Speaker 3

कुछ है?

00:27:30 Speaker 1

कुछ ना?

00:27:31 Speaker 2

कुछ प्रॉपर इमोशन्स एक्सप्रेस कर लेता है।

00:27:33 Speaker 1

अच्छा।

00:27:34 Speaker 2

दुख है तो दुख खुशी है।

00:27:35 Speaker 1

ठीक है वो।

00:27:36 Speaker 4

ये भी बता देता है अच्छा जो होता है वो बता देता।

00:27:39 Speaker 1

है जी आपका ना।

00:27:40 Speaker 5

जी सुख दुख का तो बता ही देता है आप कोई आपकी दूसरी।

00:27:44 Speaker 1

कोई भावना?

00:27:45 Speaker 5

नहीं, ऐसा कुछ नहीं है। मतलब जो उसको नीड जीस, जो उसकी जरूरत की चीजें हैं नहीं, जो उसे चाहिए या कुछ भी हो रहा है ऐसे इस तरीके का?

00:27:53 Speaker 5

बाकी वो चीज़ बता देता है जैसे चोट लग गयी तो वो रियेक्ट करेगा, ना की दुख हो रहा है या कुछ।

00:28:00 Speaker 1

ऐसा।

00:28:01 Speaker 3

लगा।

00:28:01 Speaker 5

गयी। जैसे अगर फीवर वीवर हो गया तो वो वो ये चीज़ थोड़ा ना उसको पता है।

00:28:05 Speaker 1

अच्छा।

00:28:06 Speaker 5

वो नहीं बता पायेगा वो भी वो भी।

00:28:07 Speaker 1

तो भावना में।

00:28:08 Speaker 5

ही आणी भावना मतलब ये इन सभी बच्चों में यही कंडीशन होती है।

00:28:13 Speaker 5

कुछ चीजे तो ऐसी है जो वो बता सकते है। कुछ चीजे तो माँ और बाप को मतलब खुद ही समझ जाते है की भाई इसको दिक्कत है ये वो खुद नहीं बताते है। वो तो समझनी पड़ती है। हाँ हाँ।

00:28:24 Speaker 3

जी हमारे बच्ची के साथ ये दिक्कत है वो जैसे किसी बच्चे ने उसको धक्का दे दिया, ये भी तो मार दिया।

00:28:32 Speaker 3

अब वो हमें ये नहीं बता पाएगी कि मुझे इस बच्चे ने मारा है और कहाँ मारा।

00:28:35 Speaker 5

है। बिल्कुल ये तो हमारे यहाँ बच्चे के साथ स्कूल में भी हुआ है, किसी ने इसे मारा मोरा है तो चोट वोट लग रही।

00:28:42 Speaker 3

थी अब वो।

00:28:42 Speaker 5

ने।

00:28:42 Speaker 3

मारा है।

00:28:43 Speaker 5

तो ये चीज़ नहीं पता किसी ने भी हमारे।

00:28:46 Speaker 3

साथ कर दिया है।

00:28:47 Speaker 4

फिर वो मारेगा और उनका ही मामले हैं कि वो बोल रहा था।

00:28:50 Speaker 2

जो बच्चा नहीं कर पाता।

00:28:52 Speaker 3

वो।

00:28:53 Speaker 2

उसमें सर ये भी नहीं वो रिकॉग्नाइज़ भी नहीं कर पाती।

00:28:55 Speaker 3

हाँ, वो मालूम सर, अब जैसे उसके पीठ में दर्द है तो।

00:28:59 Speaker 5

बता ही नहीं।

00:29:00 Speaker 3

पाई। ये रो गई, पता ही नहीं चलता।

00:29:01 Speaker 5

उसके पेट में दर्द है, ये दांत में दर्द है, क्या है? हमारे वाले में भी वो नहीं वो।

00:29:06 Speaker 3

रो होगी तो उससे।

00:29:07 Speaker 4

भतेरा पूछेंगे बेटा क्या इशारा करदे?

00:29:10 Speaker 4

लेकिन समझने में सब कुछ बता देता है, बस पढ़ाई नहीं करता।

00:29:13 Speaker 3

ये दिक्कत है।

00:29:14 Speaker 4

सब बताने में तो सब कुछ बता देगा कि ये हो रहा है वो हो रहा है, बस पढ़ाई नहीं करेगा। पढ़ने में दिल नहीं लगता है इनका जैसे कोई कॉपी दे दो कुछ भी दे दो ऐसे ऐसे दागेगा कुछ वर्ड नहीं दिखेगा उसको बस लंबी लंबी लाइन खींचेगा इधर से उधर पूरे गंदे।

00:29:27 Speaker 1

की अगला प्रश्न मेरा अट्टरहवा प्रश्न है जब आपका बच्चा हीन भावना क्योंकि हम सब पॉजिटिव में कभी होते हैं तो कभी साइड में भी जाते हैं। सभी लोग जाते हैं ह्यूमन में तो कभी हीन भावना हो या कोई चिंता भावना उसको आ रही हो तब वो उसको व्यक्त करने में अनुभव कर रहा हो। कुछ कठिनाई देन आप उसको कैसे बता पाते हैं? कठिनाई आपको भी आ रही होगी। समझाने के लिए की बेटा अगर कोई दुखी हो

00:29:46 Speaker 1

तो किस तरह से एक्सप्रेस करो या फिर कभी चिंता में हो तो किस तरह से आप अपने चीज़ कर सकते हो ताकि वो आप उस चिंता से बाहर आ सको।

00:29:54 Speaker 3

मेरा बच्चा अभी सिलेबल पर गया ही नहीं।

00:29:57 Speaker 1

है।

00:29:58 Speaker 3

काफी मतलब उसमें दिक्कतें है वो समझ ही नहीं पाता है की वो उसको एग्जैक्ट क्या प्रॉब्लम है कहाँ दर्द है, कहाँ पेइन है?

00:30:06 Speaker 3

इमोशंस भी उसके कुछ ही हमें पता रहते हैं कि खुशी वाला है या भूख वाला है। 10 लेवल का है मतलब थोड़ा जी जी?

00:30:15 Speaker 2

मेरा बेटा जो है, प्रॉपर मतलब उसके एक्सप्रेसशन होते हैं वो भी एक्सप्रेस कर देता है कि अगर उसके साथ जैसा भी हो रहा है, अगर कोई उसको ऐसे ही समझ रहा है तो उसको भी उसको फील हो जाता है। वो मुझे समझा भी रहता है।

00:30:25 Speaker 2

हाँ, बता देता हूँ सब कुछ वो बताता है अच्छा।

00:30:30 Speaker 1

जी जी जी।

00:30:30 Speaker 5

ये क्वेश्चन क्या है?

00:30:32 Speaker 1

ये था कि ऐसे आपका बच्चा जब कभी हीन भावना है का अनुभव कर रहा हो कभी हीन।

00:30:37 Speaker 5

मतलब दुखी, दुखी हो।

00:30:38 Speaker 1

सैड सैड, एकदम सैड हो बैठा हो कभी?

00:30:41 Speaker 1

फिर उसमें सैड भी है, चिंता भी है, परेशान भी है। हाँ ना कई बार सैड में ही हम लोग दुखी होते हैं तभी तो उस टाइम पे वो आप उसको समझा रहे हो की किस तरीके से भाई क्या करना चाहिए? ताकि आप दुखी न हो तो आपको कई सारी कठिनाई का सामना करना पड़ता होगा।

00:30:55 Speaker 5



दुखी तो अभी तो नहीं इतना पता ही नहीं की दुखी तो

00:31:00 Speaker 1

बच्चे क्या होते हैं? बचपन से ही आता है जैसे मान लो की चॉकलेट ही मांग रहे है, आपने नहीं दिया तो उसका पहला बेहेवियर यही होगा की वो दुखी हो जाएगा

00:31:06 Speaker 4

हाँ

00:31:07 Speaker 1

तो उस टाइम पे फिर आप किस तरह से बताओगे? किस तरह से आप ने उसको बोला की भाई नहीं, दुखी मत हो, कोई बात नहीं दूसरी चीज़

00:31:12 Speaker 4

बता दो

00:31:13 Speaker 4

थोड़ी देर बाद कोई आएँगे, फूल लेके आएँगे

00:31:15 Speaker 5

वो तो दुखी नहीं होते, वो तो ज़िद कर रहे हैं, उन्हें तो चाहिए

00:31:18 Speaker 1

अच्छा ज़िद वाली

00:31:19 Speaker 5

इसा

00:31:19 Speaker 1

चीज़ में आ रही

00:31:19 Speaker 5

है, दुखी नहीं होती तो उन्हें तो चाहिए जो कोई चीज़ नहीं चाहिए हमारे वाले दुखी नहीं होता वो तो फिर मारने मारने भी लगे अच्छा मुझे तो दिलवाओ

00:31:28 Speaker 1

अच्छा, अच्छा, अच्छा सही ठीक है सो अपने बच्चों को

00:31:32 Speaker 1

आपा

00:31:32 Speaker 5

समझदार बच्चे ही तो दुखी होगा

00:31:34 Speaker 1

हाँ, नहीं, ऐसी बात नहीं समझदारी समझदारा

00:31:37 Speaker 5

जिसमें अच्छी समझ होगी। जी वो तो दुखी होगा ना, जिसे समझ ही नहीं है वो दुखी क्यों होगा?

00:31:42 Speaker 1

नहीं नहीं, नहीं।

00:31:43 Speaker 3

ये।

00:31:44 Speaker 1

जैसे भाई हीन भावना था। हीन भावना से बचने के लिए हमारे पास एक जैसे कुछ स्ट्रेटेजीज होती है जैसे की लंबी, लंबी, गहरी, गहरी सांसे लेना।

00:31:50 Speaker 1

या आपस में बात करना एक दूसरे से है ना ताकि एक्सप्रेसवे में हम उसको निकाल सके तो ऐसी कुछ चीजें स्ट्रेटेजी सीखने में कोई कठिनाई का सामना करना पड़ता हो।

00:31:58 Speaker 3

नहीं, मेरे बच्चों को नहीं समझा

00:32:00 Speaker 1

समझ समझ ही नहीं पाते।

00:32:01 Speaker 2

जी नहीं समझ लेता है मैं उसका मतलब ये है की अगर कोई ऐसी कोई फीलिंग आ रही है तो मैंने कहा चलो हम बाहर चलते हैं।

00:32:07 Speaker 1

अच्छा

00:32:07 Speaker 2

चलो बालकनी में चलते हैं, चलो ये करेंगे, वो करेंगे समझ लेता है।

00:32:12 Speaker 4

चला जाता है।

00:32:13 Speaker 1

अच्छा समझ चले जाते हैं जी।

00:32:14 Speaker 5

आपा

00:32:14 Speaker 1

जो ये था जैसे की बच्चा कभी प्रॉब्लम से फेस कर रहा है, है ना? हीन भावना हो या चिंता हो या कोई दुखी हो।

00:32:22 Speaker 1

जी तो इस टाइम पे कई सारी स्ट्रेटेजीज होती हैं जैसे लंबी लंबी, गहरी गहरी साँसे लेना और बातें करना या फिर अपनी बात को एक्सप्रेस करना। चित्र के तरह राइट तो इसमें कुछ कठिनाइयों का सामना करना पड़ता होगा आप लोगों को।

00:32:33 Speaker 5

सामना तो करना ही पड़ता है।

00:32:34 Speaker 1

अच्छा मतलब सिखाते वक्त आपको कोई प्रॉब्लम होती होगी? कैसे? प्रोब्लम्स रहती?

00:32:38 Speaker 5

है। कोई भी चीज़ सिखाते हैं तो वो जल्दी से सीखता नहीं। ना।

00:32:41 Speaker 1

अच्छा जी जी ठीक है, बीसवां प्रश्न है मेरा जब आपका बच्चा कभी निराश हो ठीक है तब उनकी भावनाओं को मान्यता देने में की चलो। आप इस बात पर निराश हो तो निराश होना भी बनता है। बट उसको वो मान्यता देने में की। भाई ठीक है, थोड़ी देर के लिए निराश ही सही, आप इस बात को भी एक्सेप्ट कीजिए राइट।

00:32:58 Speaker 1

तो इसको मैं समझाने में कोई कठिनाई का सामना करना।

00:33:00 Speaker 3

पड़ता है। फिर तो भी हमें पता है कि उसकी जो चीज़ है वो खुश हो जाएगा।

00:33:06 Speaker 2

नहीं, मुझे ऐसा कोई और नहीं होता कि जब ये होता है कि उसको ऐसी कोई फीलिंग है तो मैं उसको थोड़ी देर के लिए अकेला छोड़ देती।

00:33:12 Speaker 1

हाँ

00:33:12 Speaker 1

हाँ

00:33:13 Speaker 2

तो लगता है नॉर्मल हो।

00:33:14 Speaker 1

जाए लेकिन अपने आप से ही नॉर्मल होता।

00:33:16 Speaker 2

है हाँ जी।

00:33:17 Speaker 1

जी।

00:33:17 Speaker 4

जी थोड़ी देर अकेले छोड़ो, खुद आ जाएगा।

00:33:20 Speaker 1

जी जी आपके में

00:33:21 Speaker 5

हाँ, मैंने बताया था ना अगर कभी गुस्सा है निराश हो गया तो रूम में चला जाता है।

00:33:25 Speaker 1

थोड़ी देर।

00:33:26 Speaker 5

छोड़ दिया तो खुद ही अपने आप नॉर्मल हो गया जी।

00:33:29 Speaker 1

जी इक्कीसवा प्रश्न है मेरा?

00:33:32 Speaker 1

अपने बच्चों को सकारात्मक आत्मछवि बनाये रखने में यानी पॉजिटिव एटीट्यूड बनाये रखने में लाइफ के लिए पॉजिटिव एटीट्यूड बना के रखो इसमें कुछ कठिनाइयों का सामना करना पड़ता हो।

00:33:42 Speaker 3

अभी सुलेखा का है।

00:33:43 Speaker 1

इसमें आपने टीचिंग अभी।

00:33:45 Speaker 2

नहीं, मुझे तो कोई जरूरत नहीं है।

00:33:48 Speaker 1

बहुत अच्छी बात है जी।

00:33:50 Speaker 1

सब कुछ खुद से करते हैं, सब कुछ खुद से करते हैं। आपको मतलब ऐसा नहीं की कभी दुखी हुए परेशान हो मतलब पॉजिटिव एटीट्यूड लेके अगर ऐसा कोई चीज़ असफल भी हो गई तो फिर उसको पता है अच्छा दोबारा देंगे तो मैं।

00:34:00 Speaker 4

हाँ जी, वो समझ जाता है दोबारा मैं करा।

00:34:01 Speaker 2

लूँगा।

00:34:01 Speaker 1

अच्छा जी दुबारा।

00:34:02 Speaker 4

ड्यूटी फिर करा।

00:34:03 Speaker 5

दीजिएगा इस लेवल पे

00:34:04 Speaker 1

नहीं है जी अपने बच्चों को उसकी क्षमता पहचानने में

00:34:10 Speaker 1

कोई कठिनाई का सामना करना पड़ रहा हो। आपको लगता है कि जैसे आप बताए ना बेटा ये तुम कर लोगे। हमने कोई अक्टिविटी के लिए उसको काम किया तो बोला बेटा कर लोगे, लेकिन कई बार ऐसे बच्चे भी होते हैं की नहीं, हम नहीं कर पाएंगे, नहीं कर पाएंगे तो ऐसा कुछ समस्या का सामना करना।

00:34:22 Speaker 3

है। ट्राई तो करता है।

00:34:23 Speaker 1

ट्राई करते है।

00:34:23 Speaker 3

हाँ बच्चे हम लोग ट्राई करते है उसको जो भी कहा जाता है की बेटा ये करना है वो ट्राई करता है, भले ही ना हो उससे।

00:34:29 Speaker 3

जी पर वो ट्राई करता है अब जैसे उसको कहते है की वाशिंग मशीन चलाके आओ और वो सोचेगा कहाँ वो ट्राई करता है? हम कई बार कहते है की ये करो हम उसको एंजैम भी लेना चाहते है की भाई पापा के शूज लेकर आओ और वो रेप खोल के देखे, पापा के शूज को उनसे एक बार ऐडेंटिफै कर लेता है, उसके पापा के लिए वो ले आएगा।

00:34:49 Speaker 3

लेकिन जो सिमिलर शूज है, जैसे कोई गेस्ट आया बहुत कन्फ्यूजन हो गया था आज तो।

00:34:54 Speaker 1

अच्छा।

00:34:54 Speaker 3

ठीक है।

00:34:55 Speaker 1

जी।

00:34:55 Speaker 2

अब मुझे कोई ज्यादा इफेक्ट नहीं करना।

00:34:57 Speaker 1

है। जी अच्छा आपके में आपके में कोई परेशानी नहीं होती, वैसे आपके में

00:35:02 Speaker 5

नहीं ये चीजे तो कर लेता है अच्छा।

00:35:04 Speaker 1

मतलब क्षमता।

00:35:06 Speaker 4

पहचान लेगा।

00:35:07 Speaker 1

जी अच्छा नहीं मतलब क्वेश्चन ये था कि आप उनकी क्षमता पहचानने में आपको टीचिंग कर रहे हो कि भाई नहीं बेटा ये तू कर लेगा करके क्षमता पहचानने के लिए आपने बोला है कि बेटा कर लोगे तो वो समझ के कर पाते हैं। हाँ?

00:35:17 Speaker 4

जी समझ के बता दूँ तो कर लेगा।

00:35:19 Speaker 5

घर के सारे काम कर लेते हैं।

00:35:20 Speaker 1

अच्छा।

00:35:21 Speaker 5

लेकिन जो पढ़ाई से है ना रिलेटेड।

00:35:23 Speaker 1

हाँ, हाँ।

00:35:23 Speaker 5

वो चीज़ नहीं मतलब कोशिश करेंगे, वो की कोशिश करेंगे। जितना होगा उतना ही जितना उनका आता है बस जी जी जी बाकी नहीं। ठीक है, बाकी घर के जो भी काम है।

00:35:32 Speaker 1

ठीक है, अब तेईसवां प्रश्न मेरा है आपके सामने अपने बच्चों को नकारात्मक नामों या शब्दों से बचाने में आपको कौन सी घटना का सामना करना पड़ता है? कई बार अड़ोस पड़ोस भी उनको।

00:35:42 Speaker 1

अलग डिफरेंट नेम्स बनाना चाहते हैं? ऐसे बच्चों को समझाना पड़ोस?

00:35:46 Speaker 3

के बच्चे बोलते हैं, पागल है, खीर जा रही है ये मतलब उसको नहीं उसको पता ही नहीं इसका क्या मतलब है बच्चों?

00:35:53 Speaker 1

को अच्छा आपके में बच्चा पता नहीं।

00:35:54 Speaker 3

है हाँ, बच्चों को पता नहीं है।

00:35:57 Speaker 2

कई बार ऐसा होता है कि मैंने फील करा है कि जैसे मैं एक बार जा रही थी।

00:36:00 Speaker 2

तो दो बच्चे बैठे थे वो छोटे बच्चे से ज्यादा बड़े नहीं थे लेकिन क्या हुआ की मतलब मैंने उनको थोड़ा बिहेव, उनका चेक करके वो दिया है की मजाक उड़ा रहे है।

00:36:07 Speaker 1

अच्छा।

00:36:08 Speaker 2

साथ में उनकी मदर थी मदर कुछ नहीं बोल रही है, देख तो मैंने डाइरेक्टली उन बच्चों को डांट दिया, मतलब ये देखली की मैंने उनको मतलब आपको नहीं बताई की किस तरह का बच्चा है। मैंने उनको समझाया आस पड़ोस में तो मेरे मतलब जो नेबर्स है।

00:36:20 Speaker 2

वो लोग सब समझते है। बच्चों को आपने समझाया।

00:36:23 Speaker 1

की कोई ऐसा बोले तो फिर क्या करना?

00:36:25 Speaker 2



है नहीं अभी कोई चीज़ समझ नहीं पा रहा है अभी नहीं।

00:36:29 Speaker 4

समझ पा रहा है जैसे कोई कुछ बोल दे, ऐसे चलने नहीं आता तो गुस्सा हो जाएगा बार बार रिपीट करेगा। मम्मी उसने मुझे ऐसा कुछ बोला। अच्छा आपने मेरे को ऐसे बोला जी उसने मुझे ऐसे बोला जी जी?

00:36:39 Speaker 5

जी आपको।

00:36:40 Speaker 5

जी सेम कंडीशन है वो मतलब देख जैसे चीजों को देखकर वो बहुत जल्दी कैच कर लेता है।

00:36:45 Speaker 1

अच्छा।

00:36:45 Speaker 5

मान लीजिए अगर वो किसी से देखेगा, कोई बच्चे गलत हरकत कर रही है, गलत बोल रही है तो वो सीख जाता है बहुत जल्दी।

00:36:51 Speaker 1

नहीं, ऋषभ को नकारात्मक नामों से कोई पुकार रहा हो वो।

00:36:54 Speaker 2

दोनों को बच्चे से हाँ।

00:36:58 Speaker 5

नहीं, नहीं।

00:37:00 Speaker 5

ऐसा कुछ नहीं पता इन सबको।

00:37:01 Speaker 1

बारे में जी चौबीसवां प्रश्न है अपने बच्चों को स्कूल या समावय ये समाज में साथ मिलकर खेलना समावेश करना है ना? उसमें आपको कुछ कठिनाई का सामना करना पड़ रहा हो।

00:37:12 Speaker 3

अभी तो इनिशियल लेवल पे है। थोड़ा थोड़ा सा प्रॉब्लम है, बट होफुली की भाई ये सेटल डाउन हो जाएगी।

00:37:19 Speaker 1

अच्छा

00:37:19 Speaker 3

पटा भी तो है मतलब वो?

00:37:22 Speaker 1

समाज में ज्यादातर आपको प्रॉब्लम हो रही है, क्योंकि स्कूल में तो टीचर्स यहाँ पे हैंडल कर लेते हैं। सब लोग साथ में बैठते

00:37:27 Speaker 3

है। पार्क में ले के जाता हूँ। अब पार्क में भी वो बच्चा फ्रूटी पी रहा है तो सोच छीन लेगी फ्रूटी।

00:37:32 Speaker 1

अच्छा, हाँ, नहीं।

00:37:33 Speaker 3

उसको ये नहीं पता ये गलत है ये जी जी जी उसके माँ बाप समझते हैं कि पागल बच्चा है क्या? ये ऐसे छीन रहा है इतना बड़े बच्चे को छोटे बच्चे से छीन रहा।

00:37:40 Speaker 1

है।

00:37:40 Speaker 3

ना तो 10 साल की बच्ची है और दो 3 साल के बच्चे से छीन ले तो उनको लगता है बड़ा है। बिल्कुल हमें थोड़ा सा कभी कभी फील होता है कि उसको थोड़ा सा बच्चों को दूर रखो। ये किसी बच्चों को ऐसे खिंचेगी या बोलेंगे, उनको लगता है मारा

00:37:52 Speaker 3

जी जी जी तो हम चाहते हैं कि ये अपने ही परिवार में बच्चों के साथ खेले, उनको तो पता है कि वो इसका बिहेव क्या है? जी जी बिल्कुल बट लेकिन समाज जो हमारा है, वो एक्जुअली एक्सेप्ट ही नहीं कर पाता है जीजी।

00:38:03 Speaker 1

हाँ।

00:38:03 Speaker 3

हम भी पार्ट है।

00:38:04 Speaker 1

हाँ, बिल्कुल, मैं समझता हूँ

00:38:05 Speaker 3

शायद अगर ये हमारा बच्चा ना हो तो हम भी

00:38:07 Speaker 3

इतना नहीं दुसरो को समझता है समाज की मेंटालिटी है ये प्रॉब्लम है नहीं ये बिल्कुल

00:38:13 Speaker 1

है इज़ैक्टली तभी मैं उसको मॉडल भी डाल रहा

00:38:15 Speaker 3

हूँ

00:38:15 Speaker 1

इसलिए डाल रहा हूँ क्योंकि अगर जितनी मॉडल्स आप सामने

00:38:17 Speaker 3

आए तो बड़ी प्रॉब्लम क्या है? देन?

00:38:19 Speaker 1

वो समझता है की अच्छा ये ऐसा भी होता है देन इस तरह

00:38:21 Speaker 3

एक और बड़ी समस्या क्या है? हमारे यहाँ के जीतने भी हमारे पॉलिसीस मेकर्स हैं?

00:38:26 Speaker 3

तो सारे के सारे नॉर्मल होते है

00:38:28 Speaker 1

हाँ, बिल्कुल

00:38:29 Speaker 3

वो सबसे बड़ी दिक्कत ये है उनको पता ही नहीं हमारी क्या प्रोब्लम्स है अब जैसे मैंने अपना हैंडीकैप सर्टिफिकेट मैं खुद डिसेबल्ड हूँ मैं अपना सर्टिफिकेट बनाने गया था, इतना दौड़ाते है उनको ये शर्म नहीं आती है डॉक्टर्स को या स्टाफ को ये बंदा कैसा चल रहा होगा?

### 00:38:43 Speaker 3

अब तो हॉस्पिटल आने में ही उसको नानी याद आ रही होगी। पहले बड़े-बड़े गवर्नमेंट हॉस्पिटल इतने बड़े होते हैं, मेन गेट से अंदर तक जाने में ही अच्छे आदमियों का पसीने निकल जाये। अब वहाँ पहुँचे तो ऐसे इर्रेस्पॉन्सिबल ढंग से बात करते हैं आप वहाँ जाओ, डेढ़ नम्बर में जाओ। थर्ड फ्लोर में ही भीड़ कियो।

### 00:39:01 Speaker 3

मतलब महीनों चक्कर लगवाते हैं आप, इसके बाद भी वाला आपको जवाब नहीं मिलता है। यही हाल गवर्नमेंट है। डिपार्टमेंट का इसका रीसन क्या है? जो मैंने एनालिसिस करा। माइट बी वो नॉर्मल होते हैं।

### 00:39:15 Speaker 1

वो।

### 00:39:15 Speaker 3

एजैक्टली हमारी फीलिंग्स पता ही नहीं होती है की भाई ये क्या फील कर रहे हैं बिल्कुल?

### 00:39:18 Speaker 1

बिल्कुल आप।

### 00:39:19 Speaker 3

सही है। ये सबसे बड़ा इश्यू है इवन हमारा जो डिसवर्ड जो मंत्रालय होता है जो सोशल वेयर हैं बिल्कुल वहाँ कोई भी ऐसा बंदा नहीं है जो डिफिकल्टीज़ हो जिसके पास।

### 00:39:30 Speaker 3

इसीलिए इनको सब को बुकिश नॉलेज होती है। जी, बिल्कुल में ये लोग मैग्नेटिक।

### 00:39:34 Speaker 1

होते हैं अक्ववली इनको बुकिश नॉलेज भी नहीं होती। इनको ये है की हमारे ऊपर ही ये लोग सोर्स पे करते हैं। रिसर्च किसी ने किया तब तो मिलेगा आप जैसे मैंने कहा उन्होंने मॉड्यूल बनाया, मैंने मॉडल देखा मैंने ये क्या है सर? इसमें कुछ इन्फॉर्मेशन कवर नहीं हो रही है। कुछ भी।

### 00:39:45 Speaker 3

होता वो।

### 00:39:46 Speaker 1

फिर अभी ऊपर ऊपर से तो उन्होंने तुरंत देखा उनका चार पेज का है।

### 00:39:49 Speaker 1

चार पेज का मॉड्यूल बना दिया। उन्होंने की चार पेज में पेंट्स को क्या इन्फॉर्मेशन दे रहे हैं की कैसे प्रॉब्लम का सलूशन करना है? तब जब उनको ये बताई जब दिखाया उनको सब चीज़ें देखी जब उनको लगा नहीं। आप सही जगह सही दिशा में जा रहे हैं, वो खुश हो गए वो बोले की आप कीजिये इसको अगर मतलब वाकई कुछ आपका असर कर गया तो वो मेरे पास लेके आएगा। हम लोग उसको अपना पुराना हटा के ये डालेंगे।

#### 00:40:08 Speaker 1

तो एक मतलब वो गवर्नमेंट के नाम ही चला जाएगा मेरा आइटम ही गवर्नमेंट के नाम से है। मेरा उसमें कुछ नहीं रहेगा। बट वो कम से कम पब्लिक तक पहुँच पायेगा और सही काम आ पायेगा। जो चीज़ बननी है, जो चीज़ कर रहे हो, कम से कम वो तो हो सकता है। ओके हाँ जी।

#### 00:40:18 Speaker 3

एक चीज़ और दूसरा भी हमारे जो डॉक्टर्स वगैरह हैं वो हमारा बड़ा मिसयूज भी करते हैं। मैंने नोटिस करा है। इतनी महंगी फीस लेते हैं वो लोग।

#### 00:40:27 Speaker 3

उसके बाद क्या होता है की जो थैरेपी सेंटर्स होते हैं, इतने कॉस्ट भी होते हैं? भाई ये लोग तो वैसे ही परेशान हैं हम लोग जो हैं। इतने महंगे, महंगे अच्छा फिर इतनी महंगी दवाइयाँ होती हैं, उनका जीरो इफेक्ट है। इतनी महंगी महंगी में उसको अपना मैण्ड का बना रहता है वो आइकॉन।

#### 00:40:44 Speaker 3

महंगी महंगी दवाइयाँ होती हैं अच्छा उसके बिल्लिंग नहीं देते। ये डॉक्टर हमारे पास से देते हैं एक सिरप ₹1200 का ₹1300 का? जब के वो हो सकता है, मात्र ₹100 का हो, जो की वो आपको मार्केट में मिलेगा ही नहीं। इन्हीं डॉक्टर्स के पास मिलता है एक तरह से वो भी होता है हमारे साथ फिर बात बात है, हमारा एक तरह हो।

#### 00:41:01 Speaker 3

इजी कराओ, ये कराओ, इतनी कराने के बाद भी सब नॉर्मल मतलब मैंने अपोलो से ले करके कलावती और अमृता हॉस्पिटल मतलब बड़े बड़े हॉस्पिटल में धक्के खाने के बाद भी इतने टेस्ट कराये हैं की मैं लाखों को उसमें आ गया था। मैंने उसमें रिसाल्ट जीरो।

#### 00:41:18 Speaker 3

इतनी दौड़ धूप करने के बाद भी ये रिसाल्ट जीरो है।

#### 00:41:20 Speaker 1

ये आपने बहुत अच्छी बात भाई मैं इसपे भी।

#### 00:41:21 Speaker 3

लूट मार है।

00:41:23 Speaker 1

इसको भी पॉइंट को देखकर उसको डालूँगा कहाँ पे किस तरह से?

00:41:29 Speaker 5

इनिशियल कार्ड चाहिए मैं तब मैं आपके पास इसलिए

00:41:34 Speaker 5

मुझे पता है हम चाहते हैं ना कि बना ले तो ये इतना बड़ा एक काम है। महाभारत है ये काम तो स्कूल का होना चाहिए भाई जब हम तुम्हें पता लग गया भाई पढ़ा रहे हैं, बच्चे भी ये तो आसान होना।

00:41:49 Speaker 3

चाहिए

00:41:50 Speaker 2

डॉक्टर?

00:41:50 Speaker 5

स्केल तो बनवा के देने चाहिए

00:41:55 Speaker 1

प्रॉपर स्कूल में भी कई बार इन्स्टिट्यूशन से बुलाते हैं।

00:41:58 Speaker 3

हाँ तो वही कई चीजें हैं। हाँ, बिल्कुल, बिल्कुल सरकारी हॉस्पिटल में डिसेबिलिटी एक अलग सेपरेट डिपार्टमेंट होना चाहिए कि भाई वहाँ पर सीधा बंदा जाए और एका

00:42:07 Speaker 3

तो अभी।

00:42:08 Speaker 1

इसमें अक्चवली क्या है ना नेशनल इन्स्टिट्यूशन जहाँ से मैं पढ़ा हूँ उनका एक बिजनेस सेंटर भी यहाँ पे है। नॉएडा में है वो लोग भी लगातार कैप लगाते हैं सभी लोग कैप ठीक है, वो सब भी कैप लगाते है। सभी लोग कैप लगाते हैं और

00:42:20 Speaker 2

प्रॉब्लम तो वो नहीं बनाते, कार्ड नहीं।

00:42:22 Speaker 1

कार्ड नहीं बनाएंगे, वो आपको असेसमेंट करके देंगे। सर हाँ, सर।

00:42:25 Speaker 1

उसका असेसमेंट करके दो। उनका जितना काम है उतना ही करके देंगे। उसमें वो कोई वो नहीं बैठते तो वही सब चीज़ है की मतलब पेरेंट्स को ये भी अच्छा इन्फॉर्मेशन आपको तो चलो आपने एक्सप्लोर कर लिया बट पेरेंट्स को पता चले की अच्छा ये भी है, है ना? फिर कुछ मेन्टल इलनेस का भी कोई प्रॉब्लम आ रही है तो उसके भी।

00:42:39 Speaker 1

वो नम्बर वगैरह है। साइट इनसे भी बात कर सकते हैं। इसमें भी कर सकते हैं। किनसे भी बात कर सकते हैं। एका।

00:42:42 Speaker 3

अवेयरनेस।

00:42:44 Speaker 1

होनी।

00:42:44 Speaker 3

चाहिए। हाँ ये एक्टिवेट करूंगा जी जी जी।

00:42:47 Speaker 1

अपने बच्चों को स्कूल या समावेश ये था ना हाँ अपने बच्चों को स्कूल या समाज में समावेशन सुनिश्चित करने के लिए आपको दिन कठिनाई का सामना करना पड़ता है।

00:42:55 Speaker 2

मुझे कम ही एपफोर्ट्स करने पड़ते हैं। ऐसा होता है की स्कूल में तो वो इसिली अडजैस्ट कर लेता है। उसको कोई प्रॉब्लम नहीं होती है और वही बात जैसे अगर हम किसी सोशल गेदरिंग में जा रहे हैं तो अगर उसमें बहुत ज्यादा अनजान है तो थोड़ा सा उसको मतलब प्रॉब्लम है। अनइजी होता है तो अगर फैमिली गेदरिंग है तो उसमें वो इसिली

00:43:11 Speaker 1

अच्छा मतलब जो नोन फेस है उनके साथ सही से।

00:43:13 Speaker 4

हाँ।

00:43:14 Speaker 4

वो ऐसे ही है ना जैसे दूसरे लोगों को देख के रोने लगे ना मुझे घर जाना है। अगर घर के लोग और स्कूल में तो ऐसे ही एडजस्ट कर लेता है जितनी भी देर छोड़ दो, अच्छे से रहेगा।

00:43:23 Speaker 1

जी आपके हम क्या कहना चाहेंगे?

00:43:25 Speaker 5

सेम कंडीशन है कि अगर हम है उसके साथ में मतलब जिन्हें वो जानता है उनके साथ तो सही से।

00:43:31 Speaker 5

कहीं हम उसे अनजान जाएंगे ना बाढ़ ले जाएंगे तो वहाँ पूरी तरीके से खुल नहीं पाता। बिल्कुल ऐसा हो जाता है कि ये बहुत नेक शरीफ है। मैं।

00:43:39 Speaker 1

शांत हो जाता हूँ। एकदम से मतलब शांत हो जाता है, एकदम शांत।

00:43:42 Speaker 4

नहीं होगा। बोलेंगे मुझे तो लगा।

00:43:43 Speaker 5

जाए।

00:43:43 Speaker 1

अच्छा घर जाने को बोलेंगे ठीक अगला प्रश्न है मेरा अपने बच्चों को खुद के लिए बोलना।

00:43:49 Speaker 1

कई बार उनके राइट्स होते हैं, अपने अधिकार होते हैं ना जैसे मेरी बॉटल है मेरा टिफिन है मेरा बैग है राइट अपने अधिकारों को जिसमें आपका बच्चा छीन के चला गया, उठा के चला गया तो अब नहीं बोलेंगे नहीं नहीं, मेरी बॉटल है, तुम क्यों ले जा रहे हो? जनरल बच्चे भी करते हैं, आपने देखा होगा।

00:44:01 Speaker 1

तो ऐसे चीजे सिखाने में कई बार आपको समस्याओं का सामना करना पड़ता है।

00:44:04 Speaker 3

मेरे बच्चों को भी पता नहीं है ये उसकी चीज है।

00:44:06 Speaker 1

अच्छा मतलब वो अभी।

00:44:10 Speaker 2



थोड़े से करने पड़ते हैं बट फिर मैं उसको मतलब करती हूँ एंकरेज करती हूँ नहीं तुम अपनी चीजों के लिए खुद बोलो।

00:44:15 Speaker 1

हाँ यो

00:44:16 Speaker 2

आपकी चीज़ है ये आप खुद वो लड़ेंगे इसके लिए मैंने आपके लिए बिलकुल

00:44:19 Speaker 1

हमेशा

00:44:19 Speaker 1

तो

00:44:20 Speaker 2

मैं उसको हमेशा यही सिखाती हूँ नहीं आप खुद बोलो आप खुद लड़ो इस चीज़ की जी जी।

00:44:24 Speaker 5

आपा

00:44:24 Speaker 4

नहीं अपनी चीज़ को खुद पहचानना है, किसी को छूने नहीं देगा अपनी सामान वो अलगा

00:44:28 Speaker 1

अलग लेकिन ऐसे बहुत सारे चीज़ होती।

00:44:32 Speaker 2

है माना

00:44:32 Speaker 1

लीजिए कि मेट्रो में है। मेट्रो में उनके लिए सीट भी बनी है। प्रॉपरा

00:44:35 Speaker 2

नहीं, ये सब इतनी समझा

00:44:37 Speaker 1

नहीं आता है।

00:44:39 Speaker 2

इस चीज़ के लिए कुछ आवाज़ उठाना उसके लिए हम उसमें उसको अरेंज करते।

00:44:42 Speaker 5

हैं जी जी नहीं, अपनी चीज़ों का नहीं पता।

00:44:45 Speaker 1

अच्छा अपनी चीज़ों का।

00:44:46 Speaker 5

भी बहुत मतलब कम है, कभी कभार तो कह देता है जैसे घर में बाकी यहाँ जैसे आएगा वो बैग या अपना वो लेके।

00:44:53 Speaker 5

उसे नहीं पता है ये मेरी है क्या? अच्छा मतलब कोई ले भी लेगा।

00:44:56 Speaker 1

तो फिर?

00:44:56 Speaker 5

हाँ, उसको नहीं।

00:44:57 Speaker 3

उसके सामने निकल लेगा हाँ।

00:44:59 Speaker 5

वो और।

00:45:00 Speaker 1

ना ही वो एक्सप्रेस करेंगे।

00:45:01 Speaker 3

ना ना के लिया है नहीं बेसिका।

00:45:03 Speaker 2

तो बोलेंगे ये मेरा है उससे छीना।

00:45:05 Speaker 5

भी लेगा है ना? अगर किसी ने उसको मार मुझे तो वो ये भी नहीं बता पाएगा कि किसने मारा।

00:45:10 Speaker 3

है। किसी ने मारा भाई ये दिक्कत है भी हमारे बच्चे की।

00:45:13 Speaker 3

अच्छा सर वो कई बार तो ऐसा होता है जैसे वो मेरे साथ स्कूटी में जा रही है घूमने वो कहीं उधर ही उसने चप्पल ही फेंक दी अपनी अच्छा सर कितनी चप्पल फेंक दी उसने अच्छा कितने जूते उसके यानी गायब हो गए?

00:45:24 Speaker 1

अच्छा।

00:45:24 Speaker 3

अच्छा हाँ उनको उतार भी देती है।

00:45:27 Speaker 1

हाँ गर्म के हाँ।

00:45:29 Speaker 3

वो उधार देती है, मान लो उसके पैरों में बिजली की दाल में फेंक दी, चलती गाड़ी पे सब बताएंगे भी नहीं की मैंने फेंक दिया उसको पता ही नहीं है।

00:45:35 Speaker 1

चल अगले प्रश्न में जाते हैं छब्बीसवां प्रश्न है और इसके बाद चार प्रश्न और रह गए हमारे कोई इश्यू नहीं है। एक सुरक्षित और सहयोगी घर का वातावरण बनाने में कई बार आप भी फ्रस्ट्रेशन लेवल बढ़ता रहता है या फिर आपका कोई?

00:45:48 Speaker 1

है ना भाई मतलब दूर के भाई सब उनको बुला लेंगे सब प्रॉब्लम आती है की साथ में मिलके निकलते हैं या फिर लड़ाई हो गई गुस्सा हो गए तो ऐसा घर का एनवायरनमेंट पॉजिटिव बनाये रखने में आपको तीन कठिनाइयों का सामना करना पड़ता।

00:46:00 Speaker 3

है दिक्कत है देखो हम लोग जो फैमिली के जैसे की माँ और मैं तो बना लेते हैं बट जो सिबिलिंम्स है वो।

00:46:05 Speaker 3

उनका फ्रस्ट्रेशन लेवल बढ़ जाता है, क्योंकि ये क्या करती है, उनकी चीज़े बिगाड़ती रहती है। मान लो उसके बैग से सामान निकाल के फेंक देगी या उसकी खाने पीने की चीज़ वो खाने बैठा है वो खा लेगी या कुछ ऐसा है? मतलब ये है की नजर बस्ती ये अपना काम कर देगी, मान लो जैसे वो हाथ धोने गया। अपना खाना रख के गया है तो ये स्टार्ट हो जाएगी।

00:46:25 Speaker 3

वो इरिटेड हो जाता है।

00:46:26 Speaker 1

हाँ, अपना वही है।

00:46:28 Speaker 3

अपना खाना खिलाओ क्योंकि ये नहीं पता है कि मुझे हाथ धोकर खाना खाना है, ये हाथ धोकर बैठना है, ये रीज़न है इस पिक्चर में जी जी।

00:46:35 Speaker 2

सर, मैं पहले ज्वाइंट फैमिली में रह रही थी तो मुझे मतलब प्रॉब्लम फेस करनी पड़ती थी। मतलब ये है बच्चों को तुम बड़ों को समझाना है, ज्वाइंट फैमिली के ज्यादा इश्यूज है, मैंने देखा।

00:46:45 Speaker 2

बहुत ज्यादा मैं वहाँ पे परेशान थी, इसीलिए अब मैं मतलब सिंगल अपना अलग रहती हूँ बच्चे और मैं तो ये है की मैं और मेरे बच्चे है तो सिर्फ दो बेटियाँ है और बेटा है तो मुझे अब कोई इतनी प्रोब्लम्स नहीं होती है की बेटियों को मैं अपनी समझा लेती हूँ, उनको समझती भी है। इस चीज़ को की भाई अभी नॉर्मल नहीं है तो?

00:47:03 Speaker 2

अब मुझे प्रॉब्लम नहीं होती, पहले मुझे होती थी।

00:47:05 Speaker 1

जी जी जी।

00:47:06 Speaker 2

नहीं।

00:47:07 Speaker 4

मुझे नहीं होती, मैं तो अकेली रहती हूँ, मैं मेरे दो बच्चे।

00:47:10 Speaker 1

अच्छा जैसे कभी आप लोग कभी।

00:47:11 Speaker 3

जॉइंट फैमिली।

00:47:12 Speaker 4

में नहीं, जॉइंट फैमिली में नहीं।

00:47:13 Speaker 2

जॉइंट में तो बहुत प्रॉब्लम होती है, जॉइंट में प्रॉब्लम होती है। जॉइंट।

00:47:15 Speaker 4

में भी रही हूँ तो अम्मी के साथ ही रही हूँ तो कोई दिक्कत नहीं।

00:47:18 Speaker 1

है। जी जी, आपके में जरूरी है चार चार चीज़ के लिए।

00:47:21 Speaker 5

मतलब जैसे उसके भाई बहना।

00:47:23 Speaker 5

करते हैं वो हाँ हाँ जी जी।

00:47:25 Speaker 1

उसमें या फिर।

00:47:25 Speaker 5

उस सभी के साथ होता है।

00:47:27 Speaker 1

मतलब उसमें पॉजिटिव एनवायरनमेंट बनाये रखने में की। बच्चों को जा बाकी बच्चों को जा के गुस्सा हो रहे हैं। नहीं, गुस्सा नहीं होना है तो फिर उस टाइम पे आपके इस तरीके से।

00:47:34 Speaker 5

नहीं हमारे।

00:47:36 Speaker 1

भाई भतीज दो हैं, वो उसके साथ में कोआपरेट करते हैं।

00:47:40 Speaker 5

अगर वो कुछ गलत हरकत भी करता है, वो ऐसा चीज़ तो।

00:47:43 Speaker 5

उसको वो प्यार से हैंडल करते हैं। मतलब ऐसे नहीं करते हैं।

00:47:45 Speaker 1

जी जी ठीक है देन उसके बाद सत्ताईसवां प्रश्न है मेरा अपने बच्चों की जरूरतें शिक्षकों को समझाने में आपको कई बार समस्या का सामना करना पड़ता है।

00:47:56 Speaker 3

शिक्षक को तो हम लोग बता ही देते हैं क्या?

00:48:00 Speaker 1

क्या है? तो फिर वो।

00:48:01 Speaker 3

से इश्यूस रहते हैं।

00:48:03 Speaker 1

ठीक है ना? एक्सप्रेस कर पाते हैं। टीचर्स को भी ये चीजें ठीक है।

00:48:06 Speaker 3

उसको बताया।

00:48:07 Speaker 2

था। जी वो टीचर्स तो उसके ज्यादा समस्या थी।

00:48:11 Speaker 1

मतलब हम समझा पाते हैं मतलब सही तरीके से ये सब ठीक है।

00:48:15 Speaker 1

अच्छा आप भी बता दे।

00:48:18 Speaker 5

टीचर्स हाँ।

00:48:19 Speaker 1

टीचर्स के लिए अगर वैसे टीचर्स को बताते हैं ना की बच्चों की ये जरूरतें है इसके हिसाब से आप पढ़ाइये है ना देन? उसमें कोई कठिनाई का सामना करना पड़ रहा हो।

00:48:28 Speaker 5

नहीं ऐसा तो कुछ नहीं है, लेकिन हमें तो ये फील हुआ है। देखो कई साल से हम बच्चे को यहाँ ला रहे हैं।

00:48:34 Speaker 5

रिज़ल्ट हमें यहाँ कुछ नहीं जीरो है अभी मेरे हिसाब से तो अब हम कहने लगे झूठ तो ये भी हो सकती।

00:48:40 Speaker 2

है।

00:48:40 Speaker 5

भाई कुछ तो मतलब कई साल में तुम ये मैं कहूँगा आप टीचर हो अगर आप किसी मतलब एक एनिमल्स कुछ कुछ को भी।

00:48:48 Speaker 5

कुछ ऐक्टिविटी सिखाओगे तो कुछ तो सीखेगा वो?

00:48:50 Speaker 1

हमें।

00:48:50 Speaker 5

कोई एग्जाम्पल दो भाई तुमने इसको कई साल रखा है तुमने क्या सीखा है कोई एक चीज़ हमें बता दो, रिज़ल्ट जीरो है जी बस ये है हम घर पेन लगा के छोड़ देते हैं।

00:49:00 Speaker 5

बाकी।

00:49:01 Speaker 3

कुछ नहीं है हाँ, एक शैडो टी शर्ट चाहिए।

00:49:03 Speaker 5

ये जो हकीकत है मैं यहाँ चाबलोशी तो महिला का नहीं है मेरे हिसाब से बाता।

00:49:08 Speaker 3

मुझे भी बहुत मुश्किल लग रहा है मेरे को।

00:49:10 Speaker 5

मुझे भी ये लग रहा है ना क्योंकि हकदार है बिज़ार कितने साल में बताया मैं अब कई साल हो गए, बच्चे को बुला लिया, मतलब दोतीन साल तो हो ही गए।

00:49:19 Speaker 5

नहीं।

00:49:20 Speaker 1

सर आपने अभी उनका लेकिन कुछ

00:49:22 Speaker 5

तो रिसाल्ट होना चाहिए ना स्कूल का जी जी जी भाई एक तो हम कहने लगे भाई ये इतने साल से आ रहा कुछ हमें एक ऐसी चीज़ बताओ जो आपने इसे सिखाई हो अगर ये बता दे हम हम मान जाएंगे पढ़ा रहे ये नहीं है तो बस एक हम ये है की भाई हमारे घर पर बच्चा रहेगा पूरा दिना

00:49:36 Speaker 5

घर में इरिटेट होगा, हम लाते है, छोड़ जाते है, अभी ले आते है, बस वैसी उम्मीद इसके अलावा और कुछ नहीं है।

00:49:43 Speaker 1

नहीं, कभी जैसे कोई रिसाल्ट नहीं है। आपने भी कभी बताया जैसे टीचर्स को बता की शायद घर पे या ये रेकॉर्डमेंट है? ये टीचिंग कर रहे है आप कुछ ऐसा आपने बताया हमको?

00:49:51 Speaker 5

क्या चीज़?

00:49:52 Speaker 1

जैसे होता है ना कई बार पेरेंट्स।

00:49:53 Speaker 5

बताते भी हैं। हम यहाँ तक के कहते हैं वो बटन चाहता है, बच्चा शर्ट चाहता है, हमारे बच्चों को आदत है, बटन चाहता है। हम उनसे कहते हैं ऐट लिस्ट भाई स्कूल भेज रहे हैं, कम से कम आप इसका इतना तो ध्यान रखो ये ना चबाएं अब ये तो कर लेता है ठीक है ये हमारी कोई भी आप है।

00:50:10 Speaker 5

रिस्पॉन्सिबिलिटी कुछ नहीं है, जीरो है। अगर कोई हमसे यहाँ का कोई अधिकारी पूछे तो हम साहब बताएंगे, हम क्यों करे हमारे लिए कोई रिसाल्ट नहीं है भाई जीरो है हमारा रिसाल्ट तो हम तो बस इसीलिए है कि बच्चों के लिए खुला है यहाँ टाइम पास करता है, छोड़ देते हैं कुछ सीख गया बच्चों में मिलके कोई हरकतों की अक्टिविटी वो अलग बात है बल्कि टीचर जीरो।

00:50:30 Speaker 5

कुछ नहीं है जी।



00:50:32 Speaker 3

यहाँ पर टीचर कुछ ज्यादा होने चाहिए देखो।

00:50:35 Speaker 5

अगर आप किसी जैसे आपको नई चीज़ की लगन है, आप मेहनत कर रहे हो जी जी तो कुछ न कुछ रिज़ल्ट आएगा न बिल्कुल अगर दिल में होगा अब मैं वो मैं यहाँ पे पढ़ाने लगा मेरे मुँह में तो मोबाइल चला रहा आज टाइम हो गया।

00:50:51 Speaker 5

खाली खाने का यहाँ किसी का कोई इंटेंशन नहीं है। यहाँ टाइम की पूर्ति है बस और कुछ नहीं है यहाँ जीरो है।

00:50:57 Speaker 1

समझ गया मैं समझ गया जो टीचर वाले जो पॉइंट्स है वो एज़ैक्टली आपने बताया अच्छे से क्लेरिटी की अगला है मेरा।

00:51:03 Speaker 5

तो सीखो जी।

00:51:04 Speaker 1

अपने बच्चों को घर के छोटे कार्य में शामिल करने में कोई घटना का सामना करना पड़ता हो?

00:51:09 Speaker 2

सही बताता

00:51:10 Speaker 1

है कार्य।

00:51:11 Speaker 2

में शामिल।

00:51:12 Speaker 3

कर लेते हैं बट लेकिन वो भी हमारे डिटेच हो जाता है, डिटेच नहीं होता है, जी जी वही दिक्कत है।

00:51:20 Speaker 5

जी जी।

00:51:21 Speaker 1

ये अपने बच्चों को कोई छोटे कार्यों में शामिल करने में कोई कठिनाई का सामना करना पड़ता हो।

00:51:26 Speaker 2

नहीं, सर तो नहीं होता है।

00:51:29 Speaker 5

अच्छा।

00:51:29 Speaker 2

छोटे काम तो कर लेते।

00:51:30 Speaker 1

है। छोटे काम में कुछ शामिल करने में बच्चों को परेशानी होती हो।

00:51:33 Speaker 5

नहीं काम में तो जो कुछ भी काम बता रहे तो कर लेता है।

00:51:37 Speaker 1

अच्छा ठीक है, अपने बच्चे को परिवार में संगठित से जोड़कर रखने में कुछ कठिनाई का सामना करना पड़ता हो।

00:51:45 Speaker 3

इन बच्चों के साथ थोड़ी दिक्कत तो रहती ही है।

00:51:48 Speaker 3

युनाइटी नहीं हो पाते। बड़ी मुश्किल से होते हैं क्योंकि इनका मूड जो फ्लक्चूएट रहता है मूड की वजह?

00:51:52 Speaker 1

से जनरला

00:51:53 Speaker 3

इंजैक्टली इनका मूड गुड भी उसको रहता ही नहीं है। ये चीज कभी ना होती।

00:51:56 Speaker 5

है ये वाली?

00:51:57 Speaker 1

बात ये तो फिर आपका भी कोई।

00:51:59 Speaker 2

सेमा

00:51:59 Speaker 1

है उसका।

00:52:00 Speaker 2

दिन से सोचा

00:52:01 Speaker 1

निकालते हैं आपका विषया

00:52:02 Speaker 5

सब सब यही होता है। इसमें अगर ये समझ जाए तो फिर।

00:52:05 Speaker 3

हमें आने की जरूरत ही क्या है?

00:52:09 Speaker 1

मेरा अगला प्रश्न है, अपने बच्चों के लिए जो चिकित्सा वगैरह, जो थेरेपी सेशनस वगैरह हम लोग कराते हैं या विकासात्मक के जॉब सेशनस वगैरह करवाते हैं, उनमें आपको किन बाधाओं का सामना करना पड़ता है?

00:52:21 Speaker 3

एक तो बहुत ज्यादा कॉस्टली है अगर हम बाहर सेट करा रहे हैं और यहाँ तो मैंने अभी तक देखी नहीं है, फिजियो है यहाँ पर अभी।

00:52:27 Speaker 3

होती है नहीं, फिजियोथैरेपिस्ट ही नहीं है। देखते हैं फिर ऐसे बच्चों की जब देखो बच्चा चल नहीं पाता है, फिर नशे में कार हो जाएगी यहाँ पर कितने बच्चे हैं? कम से कम चार या पांच फिजियोथैरेपिस्ट होने चाहिए ताकि वह रेगुलर जैसे की जैसे की मैं इंडीविजुअल जाकर कराता था।

00:52:47 Speaker 3

सेंटर पे ऐसे बच्चों को सपोर्ट करने के लिए वो बेसिकली इन्हीं के लिए डिजाइन थी। ऊपर से उसको ऐसा बनाया गया था। मॉडिफाईड करके बच्चे गिरे बिना उसको चलता भी रहे ऐट लिस्ट कम से कम वो कुछ तो चलेगा ना जी?

00:53:01 Speaker 1

जी।

00:53:02 Speaker 3

जी बिलकुल।

00:53:03 Speaker 3

उसको ये भी रहेगा मैं चल रहा हूँ उसकी मूवमेंट भी जो उसकी वगैरह वो भी बहुत जरूरी है। और जो ये जिम वाली बॉल होती थी उसकी थेरेपी कराते थे ये लोग, इसकी पूरी बॉडी हाँ कुछ मुझे ऐसा लगा नहीं है अभी तक बट ये है की ये थोड़ी सी।

00:53:21 Speaker 3

जो मुझे लगा है थोड़ा सा बेनिफिट ये लगा है कि मेरा बच्चा जो है, जैसे पहले घर पे रहता था, बाहर नहीं जाता था। अब वो यहाँ आकर भी बच्चों को थोड़ा सा घुलमिल जाता है। थोड़ा सा ये है कि भाई वो पहले मेरे साथ ही रहता था, वो तो छोड़ता नहीं था, 5 मिनट के लिए भी अब मैं काफी टाइम से आपके साथ बैठा हूँ।

00:53:38 Speaker 1

हाँ, बिलकुल।

00:53:38 Speaker 3

उसको पता नहीं मेरे पापा कहाँ है।

00:53:40 Speaker 3

तो एक तरह से अटैच ये तो थोड़ा बेनिफिट है ठीक है बट इन दी फिजिकल वे अगर हम देख रहे है की भाई इसकी बॉडी को भी भाई ऐसे बच्चे चाहिए चाहिए।

00:53:56 Speaker 3

और हम डेली अफोर्ड ही नहीं कर सकते, क्योंकि भैया ₹1000 का ये ₹500 का पर डे का सेशन, वो भी आपके घर के पास नहीं है सर आप कर भी लो, जैसे जैसे घर के पास हो तो उसके लिए आपको जाना पड़ेगा। इनके स्पेशल सेंटर हाँ आने जाने नहीं है, आपका इतना हो जायेगा और फिर टाइम भी नहीं है। आपके पास इतना।

00:54:13 Speaker 3

या दुकान करोगे या कुछ काम करोगे? अब मैं यहाँ से जाने के बाद अब ड्यूटी पर जाऊंगा, फिर वो रात को होगा। फिर मैं सुबह उठ के मेयर के तरफ से ट्रिपल ड्यूटी चल रही है। मेरे को तो ये हमारे लिए।

00:54:28 Speaker 1

ये था कि बच्चों को चिकित्सा या विकास वाले जो कार्य जैसे सहायता जैसे थेरेपीस वगैरह कराने में कोई समस्या का सामना करना पड़ता।

00:54:34 Speaker 2

है हाँ, काफी सारी प्रॉब्लम मतलब प्रॉब्लम है। इसमें सबसे बड़ी प्रॉब्लम तो यही होती है कि हम उसको बजट में मेंटेन नहीं कर पा रहे, क्योंकि उनकी फीचर्स स्पीचेस बहुत ज्यादा होती है और दूसरा ये होता है कि सेंटर्स जो है इतनी दूरदूर होते हैं तो वहाँ आनाजाना

00:54:47 Speaker 2

टाइम की भी परेशानी है। और वैसे भी ज़ाहिर सी बात है, परेशानी है कि वो बहुत ज्यादा कोस्टिंग में पड़ जाता है तो इसलिए बहुत प्रॉब्लम है जी।

00:54:54 Speaker 4

फैमिली में फिजियोथेरेपी तो मैं लेके जाती थी, पहले से अब टाइम की वजह से नहीं ले जा पाती हूँ। पहले ये जामिया में ही डेढ़ साल तक मैंने कराया था।

00:55:03 Speaker 4

एडमिशन का स्कूल हाँ जी वहाँ होता है।

00:55:06 Speaker 5

नहीं, हम नहीं कराते।

00:55:07 Speaker 1

फिजियो जाते वक्त कराने में ऐसी कोई समस्याओं का सामना करना पड़ता हो कि।

00:55:10 Speaker 2

गए हैं।

00:55:11 Speaker 5

जब हम कराते ही नहीं।

00:55:12 Speaker 3

है तो वो नसीब तो नहीं, वैसे भी वोलन्टिर्स आ जायेंगे आपके लिए तो।

00:55:19 Speaker 2

वही भी तो सारी बात है कि जामिया की जो गई है।

00:55:23 Speaker 2

पीपीटी के स्टूडेंट्स हैं और उनको और क्या उनको बुलाते हैं? एंट्रेंस आ।

00:55:26 Speaker 3

जाएंगे। बिलकुल।

00:55:27 Speaker 2

अच्छा समझ।

00:55:29 Speaker 3

ही नहीं।

00:55:30 Speaker 1

इन लोगों की हमने ट्रेनिंग की। इसी बहाने ट्रेनिंग की एस ए स्टूडेंट्स को ही।

00:55:33 Speaker 2

बुलाते हैं ट्रेनिंग वाली जी।

00:55:35 Speaker 5

फाइनांस ऐसी चीजें होती है ना जो माँ बाप को पता नहीं होती।

00:55:38 Speaker 1

वही चीजें मैं आप।

00:55:40 Speaker 5

तो कर चुके हैं।

00:55:42 Speaker 5

आपको ना बच्चे की बॉडी भी पता होगी कि हमारे पास कैसे भी है साधन कि इसको अगर थोड़ा सा बिगड़ भी जाए तो बिलकुल भी फादर ये है उसको मना नहीं करेगा। चाहे पैसे भी लो बिलकुल बिलकुल बिलकुल, लेकिन उनको सुविधा मिलनी ही चाहिए। आप तो सही कह रहे हैं ये हमारे नियरबै है कोई बात?

00:56:00 Speaker 3

नहीं वो चार्ज कर लो।

00:56:01 Speaker 3

इसी लिए यही होता।

00:56:02 Speaker 5

है पेरेंट्स तक।

00:56:03 Speaker 1

इन्फॉर्मेशन पहुंचना ये बहुत जरूरी होता है जैसे फिजियोथेरेपिस्ट हो या हो स्पीच थेरेपिस्ट हो। वो जैसे रोज रोज सेशन देते रहते हैं एंड देन उसके साथ साथ पेंट्स को भी समझाते हैं, वो बिठाकर सामने बिठाते हैं। अगर आप कभी सेशन में गए होंगे।

00:56:15 Speaker 1

देखा होगा सामने बिठाते फिजियोथेरेपिस्ट तो आपको बोलने का आपको हाथ नहीं लगाने का बट आपका स्पीच थेरेपिस्ट वगैरह सामने बिठाएगा ये चीज मैं कर रहा हूँ एग्जैक्टली तुम देखो क्योंकि घर पे तुम्हे भी जाके सेम प्रैक्टिस करानी होगी एग्जैक्टली है ना तो ये चीज बहुत जरूरी होती है पेंट्स को भी इन्फॉर्मेशन लेना, पेंट्स को भी साथ लेके चलना ये ऐसा नहीं की टीचर का काम है या फिर पेंट का काम है।

00:56:32 Speaker 1

इसी एक को जिम्मेदारी साथ मिलकर काम करना पड़ेगा तब जाके बच्चे में इम्प्रूवमेंट आएगी। और इसीलिए जहाँ तक मैंने मौजूद सोचा की नहीं, पेंट्स का भी कम से कम उनको इन्फॉर्मेशन तो मिले। अच्छा जाना कहाँ है वो बिचारे इसलिए प्रॉब्लम हो रही है की भटक रहे है की जाना एग्जैक्टली का?

00:56:44 Speaker 2

होता है। सर मैंने सब से कहा था एक बार की आप जो है मतलब स्पीच कब आती है मैडम ऐसी बात नहीं है की नहीं।

00:56:52 Speaker 2

क्योंकि स्पीच के लिए आते ही नहीं है और ये होता है लेकिन ये है की एक बच्चे का नंबर कम से कम एक महीने में आता।

00:56:57 Speaker 1

है।

00:56:57 Speaker 2

और वो हमसे शेयर भी करते है, वीडियो शेयर करते है और ये भी बताते है की आज बच्ची की स्पीच से रखी हुई है। वीडियो शेयर करती है की ये चीज कराई गई है और आपकी चीज रिपीट करा दी। लेकिन मैंने ये कहा था की अगर कोई पर्सनल लेना चाहे सेशन।

00:57:09 Speaker 2

आप उसके लिए थोड़ा सा मतलब चार्ज कम कर दीजिए क्योंकि सर बहुत ज्यादा है। सर ने कहा था कि उसमें हम लोग कर सकते हैं क्योंकि जाने की तरफ से।

00:57:18 Speaker 5

ही।

00:57:21 Speaker 5

अगर ये स्कूल वाले इस चीज़ पे ध्यान देना है मतलब पढ़ाई के चलेंगे, कम पढ़ाई कर दे, लेकिन बच्चे को चीज़ें सीखा देना एक मतलब जो चीज़ें अच्छी होती है सही से।

00:57:31 Speaker 1

एक्टिविटी ये सब चीज़ में देंगे तो अपने आप ही, पेरेंट अपने आप ही तो थोड़ा सा और मुझे।

00:57:36 Speaker 2

लिमिट जाना पड़ता था।

00:57:37 Speaker 2

80% बच्चा तो ऐसे ही है पढ़ाई की।

00:57:40 Speaker 5

जरूरत।

00:57:41 Speaker 2

ही।

00:57:41 Speaker 5

नहीं है एक्टिविटी सही हो जाए ये।

00:57:42 Speaker 3

ही एक कराएगा बच्चा और स्पीच कराएगा तो एक तो प्रॉब्लम है।

00:57:47 Speaker 2

थी। यहाँ पर अब पता नहीं उनका भी कुछ दिन आए एक बच्चा था तो उसके लिए आते थे।

00:57:55 Speaker 3

हर बच्चे के लिए आना चाहिए हर बच्चे।

00:57:58 Speaker 2

हर।

00:57:58 Speaker 5

बच्चे स्कूल वाले थोड़ा सा मतलब सीरियस हो जाए नहीं के नहीं, हमें करना है दिल से तो बहुत कुछ कर सकते हैं अगर देखो अगर टाइम पास करने वाले फिर कुछ नहीं हो सकता।

00:58:07 Speaker 5



वो तो जो बच्चे खुद ही इम्प्रूव हो रहे हैं, इनके माइंड ऐक्टिविटी भी चल रही है। खुद हो जा रहे हैं।

00:58:11 Speaker 3

खुद हो जा रहे हैं वो नहीं।

00:58:12 Speaker 5

हो रहे है ना?

00:58:12 Speaker 3

वो नहीं है।

00:58:13 Speaker 5

वो नहीं है इस चीज़ की तो वो ऐसा ही है।

00:58:16 Speaker 3

तो वो बहुत खुश करना बहुत जरूरी है। वही वरना देखो लाइट तो अपने आप भी चल रही।

00:58:21 Speaker 5

है। टीम आई थी बाहर से तो मैं तो था नहीं, हाँ भाई आये होंगे।

00:58:25 Speaker 5

हमारे हमारे भाई को इतना भी वो नहीं है। पता नहीं है तो हर कोई मतलब अच्छी तारीफें कर रहा है जो टीचर जी मैं टीचर की हम बताते हुए टीचर क्या है? रिज़ल्ट क्या है? भाई, टीचरों का हमारे लिए तो कोई रिज़ल्ट नहीं।

00:58:37 Speaker 3

है ग्रोथ तो बहुत बड़ी बात।

00:58:39 Speaker 5

होती है ये थोड़ी है की अच्छी अच्छी चीज़ें बताकर दी जाओ।

00:58:43 Speaker 5

बढ़िया है जी हमारे।

00:58:45 Speaker 3

हाथ में भी कुछ नहीं है। अगर उनको आप बुराई बताओगे तो?

00:58:47 Speaker 5

बुराई की बात नहीं है एक चीज़ मैंने एक छोटी सी चीज़ बताई है आपको

00:58:51 Speaker 3

हाँ

00:58:51 Speaker 2

सर, देखिए, वो इसलिए था कि वो जो फैसिलिटीज यहाँ प्रोवाइड करा रहे हैं ना वो तो कंपनी का काम यहाँ फैसिलिटीज प्रोवाइड कराना था।

00:58:59 Speaker 2

तो उनके सामने थोड़ा बहुत हमने बोल दिया वो एका

00:59:02 Speaker 3

वो अलग हो जाता है क्योंकि बच्चों को इक्विपमेंट्स मिल जाएंगे। मानलो।

00:59:06 Speaker 5

वो तो सही है। अगर कोई सोच को लेकर कर रहा है तो हम सोचता है कि भाई इनके लिए हमें कुछ चीज़ें प्रोवाइड करा सकते हैं। यहाँ इनके सामने तुम अच्छे से बात वो सही है लेकिन अगर कोई मान ले अगर कोई टीम आ जाए, अभी कोई है तो ट्रस्ट कहीं।

00:59:18 Speaker 5

ये थोड़ा न चला रहे हैं। इस सैलरी तो ले रहे होंगे, ये या फ्री सेवा है ये ट्रस्ट कोई तो होगा ही नहीं।

00:59:24 Speaker 1

मेरे खयाल से जहाँ तक

00:59:25 Speaker 2

वेलफेयर कुछ एंज़ेक्टली पता।

00:59:26 Speaker 1

नहीं मेरे को।

00:59:27 Speaker 5

चैरिटी होती है न पैसा तो आता ही होगा, कहीं से कोई तो इसका मालिक होगा ही नहीं।

00:59:31 Speaker 2

देखिये ये तो एनजी ओह टाइप का एना

00:59:34 Speaker 5

जी ओह है ट्रस्ट का पैसा आता है।

00:59:37 Speaker 5

उसी में से कोई फ्री में मैं तो काम नहीं करूँगा, कोई भी नहीं करेगा।

00:59:41 Speaker 3

सही बात है।

00:59:43 Speaker 5

जब हिंदी चीज़ का आपको पैसा मिल रहा है तो ईमानदारी से अपना मतलब थोड़ा सा काम करो। कुछ ऐसे टीचर हैं जो नहीं कर रहे हैं उन्हें हटा दो। भाई भाई हमने तो तुम्हें रखा है भाई बच्चों को थोड़ा सा लगाना चाहिए।

00:59:56 Speaker 5

हाँ भाई पढ़ाई हो रही है भाई हमने सही जगह है लेकिन हमें ये चीज़ बिल्कुल फील नहीं है। हमें लगता है की बस हम बिज़ार रहे।

01:00:03 Speaker 3

हैं। सलूशन ही है यहाँ पर कोई जैसे टीचर या वॉलेटर्स आए तो एक शैडो टीचर अपने बच्चे के लिए की भाई इसपे थोड़ा सा आप अटेंशन मत हो पे लेलो कोई दिक्कत नहीं है सभी जहाँ बच्चों को ला ही रहे हैं ये एक शैडो टीचर आ रहा है।

01:00:17 Speaker 3

नहीं, हमें पता है कि एक टीचर 20 बच्चों को एक दो बच्चों को पूरा नहीं कर पाएगा।

01:00:22 Speaker 1

कोई चांस नहीं है।

01:00:22 Speaker 3

तो मान लो अगर इसमें तो आपके पास है जो टीचर।

01:00:25 Speaker 1

है तो हमें कहते हैं कि छह बच्चे लेकर जाना होता है। एक क्लास में छह हो गए, आठ हो गए, आठ टीचर, आठ बच्चे हो गए, एक दो टीचर हो गए, हाँ, इस तरीके से हम लोग चलते हैं, ज्यादा नहीं है, आठ से ऊपर नहीं।

01:00:33 Speaker 2

है।

01:00:34 Speaker 1

हाँ तो ये थोड़ा सा

01:00:34 Speaker 2

और

01:00:35 Speaker 1

प्रोब्लम्स हैं उन लोगों के पास भी मैं घुसा नहीं, मैं भी पूछा नहीं।

01:00:39 Speaker 3

हाँ, वो तो वो

01:00:41 Speaker 5

तो मनेजमेंट देखते हैं।

01:00:43 Speaker 2

नहीं। वैसे भी वो योगा टीचर हैं, स्पेशल एजुकेटेड हैं, सिर्फ दो ही हैं तो फॉर्मल में, वो दूसरी।

01:00:49 Speaker 5

नसीम सब को ऑपरेटिव करते हैं तो नसीम सब मानते भी है चीजों को।

01:00:58 Speaker 1

सर, ये मेरा आखिरी प्रश्न है कि ये सारे जीतने भी मैंने 30 प्रश्न आपके सामने पूछे इन सब चुनौतियों और सारे चुनौतियों पे हमने बात की है ना घर के सारे जो चुनौतियां?

01:01:07 Speaker 1

इन सब चुनौतियों से निपटने के लिए अगर किसी प्रकार का जैसे मैं मॉड्यूल बनाने जा रहा हूँ तो क्या लगता है उससे कुछ मतलब? आपको क्या इनिशियल थॉट क्या आता है की वाकई कुछ हो सकता है कुछ क्या ऐसे मॉड्यूल की जरूरत है? पेरेंट्स को आपको लगता है की ये एरिया है, ये खाली एरिया है।

01:01:21 Speaker 3

ये गैप है और आपने बहुत अच्छे इनिशिएट करा है और विश यू ऑल दी वेरी बेस्ट।

01:01:26 Speaker 3

क्योंकि देखो अगर आप समाज में कहीं भी गैप हो उसको फील कर रहे हो तो ये बहुत बड़ा अचीवमेंट है। इवन आपको ब्लेसिंग्स भी मिलेंगे इसके लिए ये गैप है। लिटरली लोग नहीं जानते हैं जैसे कैसे फील करना है तो होप्स विल बी बेटर जी बिलकुल।

01:01:43 Speaker 2

जी जी सर ये बहुत जरूरी भी है।

01:01:45 Speaker 1

जी।

01:01:45 Speaker 2

क्योंकि पेरेंट्स का अवेयरनेस भी बहुत जरूरी है जी ये बहुत से पेरेंट्स जानते हैं। बहुत से पेरेंट्स में भी नहीं जानते।

01:01:51 Speaker 1

खासकर।

01:01:51 Speaker 2

और दूसरी बात जो नॉर्मल बच्चों के पेरेंट्स हैं, उन लोगों को जानना बेहद जरूरी है।

01:01:55 Speaker 1

बिल्कुल।

01:01:55 Speaker 2

बिल्कुल कि इन पेरेंट्स और इन बच्चों के साथ साथ क्या क्या प्रोब्लम्स आती हैं ये।

01:01:59 Speaker 1

जी। ऐसे नहीं कि जो सिर्फ हमारे जैसे की सबको नॉर्मल लोगों।

01:02:02 Speaker 2

को भी पता होने चाहिए जो नॉर्मल बच्चों के।

01:02:06 Speaker 2

नहीं होना चाहिए। मेरे साथ बेटे के साथ वो इन्सिडेंट्स हुआ था कि ई रिक्शा में बच्चों ने उसकी मजाक उड़ा दी तो मैंने सोचा था कि मैं सर से बोलेंगे प्रोजेक्ट क्या करता हूँ? जो है कि जो हमारे आस पास के स्कूल हैं के जो स्कूल हैं कम।

01:02:21 Speaker 1

से।

01:02:21 Speaker 2

कम बच्चों को कम से कम ये।

01:02:23 Speaker 2

उनको समझाया जाए कि इस तरह के बच्चे हैं, इनके साथ ऐसा बिहेव न किया जाए

01:02:27 Speaker 1

बिल्कुल बहुत

01:02:27 Speaker 2

सही आपका जो ये मॉड्यूल है, जो इसके लिए बहुत ज्यादा सपोर्टिव होगा जी

01:02:32 Speaker 1

बिल्कुल बिल्कुल जी जी

01:02:33 Speaker 2

मेरा ये तो यही है कि पॉइंट को मैं डाल रहा

01:02:35 Speaker 1

हूँ

01:02:35 Speaker 2

उसमें

01:02:35 Speaker 1

बिल्कुल

01:02:36 Speaker 2

ये बहुत जरूरी है

01:02:37 Speaker 5

जी जी

01:02:37 Speaker 1

जी जी, आप क्या कहना चाहेंगे बहुत?

01:02:40 Speaker 4

जरूरी है

01:02:40 Speaker 1

ये होना

01:02:41 Speaker 4

चाहिए।

01:02:41 Speaker 1

जी।

01:02:43 Speaker 5

जी बच्चों को ज्यादा सीखना सीखाना ये तो सब मैनेज हो जाएगा, लेकिन इसके लिए जो फैसिलिटीज है जो गवर्नमेंट की जो स्कीम वगैरह चल रही है ना, ये स्कूल वालों को प्रॉपर मतलब यहीं पर।

01:02:53 Speaker 5

कोशिश करेगी। यहीं प्रोवाइड हुए हैं सारी चीजें ये।

01:02:56 Speaker 3

डिसिप्लिन होना।

01:02:57 Speaker 5

चाहिए हमारा बच्चा है, हमें ये नहीं पता की सर वो स्कूल का है। मैं

01:03:01 Speaker 1

अभी अपने मॉड्यूल की बात कर रहा हूँ, मैं अभी स्कूल का नहीं हूँ।

01:03:05 Speaker 5

जो आप बना रहे?

01:03:06 Speaker 1

हो हाँ जी जी।

01:03:08 Speaker 1

इन्फॉर्मेशन डालूंगा।

01:03:09 Speaker 5

ये होना चाहिए फिर?

01:03:10 Speaker 1

उसमें ऐसी इन्फॉर्मेशन डालूंगा, गवर्नमेंट की स्कॉलरशिप्स वगैरह आती है। वो सारी चीजें वो कहाँ पे मिलेंगे आपको कहाँ पे साइट कम से कम आपको इतना आप जाके स्कूल में भी पेरेंट्स को पूछ मतलब पेरेंट्स जाके पूछ पायेगा इन्स्टिट्यूशन में पूछ पायेगा अगर उसको और इन्फॉर्मेशन लेनी होगी तो भी मिल पायेगा।

01:03:23 Speaker 1

बट ऐसी चीजें मानें तो चले पेरेंट्स को अच्छाये भी तो होती है गवर्नमेंट।

01:03:26 Speaker 5

ने नहीं, नहीं जीस चीज के लिए आपने कोशिश की है ना? ये बेहतरीन कदम है ये मेरे हिसाब से ये सबके लिए फायदेमंद है। अगर इन्हें बहुत सारी सुविधाएं मिल जाएगी ना तो हर माँ बाप के लिए थोड़ी सी राहत हो जाएगी, राहत हो जाएगी जितनी उन्हें भी मुसीबतें उठानी हैं। परेशानियाँ हैं ना?

01:03:41 Speaker 5

कम हो जाएगी। थोड़ा रिलैक्स तो मिलेगा ना?

01:03:43 Speaker 1

जी जी, मैं अपना भी ऐसे मॉड्यूल प्रेपर करूंगा तो एक बार आप सबको ही पूरे दूसरे पेरेंट्स है, उन लोग को भी दूंगा। एक बार आप लोग भी देखेगा पढ़ के कहाँ कैसा आपको लग रहा है उसमें और क्या कमियाँ फिर रह गईं तो आप मेरे को बताइये ताकि उसको और कमियों को दूर करके मैं और अच्छा बना पाऊँ। आप लोगों ने मेरे को अपना समय दीजिये।

01:03:58 Speaker 4

मुझे पता नहीं था की ये

01:04:00 Speaker 2

जैसे डिसेबिलिटी कार्ड बनते हैं तो इसपे व्हाट्सएप लिखो

01:04:02 Speaker 4

जाते।

01:04:03 Speaker 1

हैं।

01:04:03 Speaker 4

तो सबने मुझे बोल दिया, यहाँ भी आये तो उसने बोला डिसेबिलिटी कार्ड बना लो, जहाँ भी लेके जाओ बच्चों को सब बोल देते हैं, कार्ड बना लो, कार्ड बना लो तो हमारे यहाँ ये सब गांव का था, हमारे गांव का बिहार का था तो हम बिहार में गए बनाने।

01:04:18 Speaker 4



तो वहाँ तो बना दिया उसने लेकिन उसमें परसेंटेज कट नहीं दिया। अब वो कोई काम का नहीं है और

01:04:24 Speaker 2

उसको 40% नहीं।

01:04:26 Speaker 4

30% लिख दिया। पहले तो वो बना नहीं रहा था डॉक्टर अब फिर मैंने बोला कि मुझे स्कूल में जरूरत है, बना दो तो बनाया तो।

01:04:33 Speaker 3

30%।

01:04:35 Speaker 2

सर्टिफिकेट?

01:04:35 Speaker 1

करा।

01:04:36 Speaker 2

सकता हूँ अब?

01:04:36 Speaker 5

हम जो मैं जो आपसे मिलने आया था, मुझे नहीं पता आप ये सारा मुझे तो मैंने पूछा कि मुझे वो डिसेबिलिटी कार्ड का कैसे होगा? वो कैसे बनेगा? वो पेंशन का जो बनता है ना पेंशन का पेंशन?

01:04:48 Speaker 1

का?

01:04:49 Speaker 5

वो कैसे बनेगा? वो भरो कहने लगे, पांच नंबर कमरे में चले जाओ, उनसे बात कर लो बता दो।

01:04:54 Speaker 1

अच्छा, उन्होंने फिर कहा।

01:04:55 Speaker 5

था हाँ, मिसिंग दे।

01:04:56 Speaker 3

दिए

01:04:56 Speaker 2

हाँ

01:04:57 Speaker 1

इसा

01:04:57 Speaker 2

तरह से मैं तो मैं तो मैं 1 मिनट मैं भटकतो

01:05:00 Speaker 4

भटकतो

01:05:01 Speaker 2

बना और उसमें भी परसेंटेज मैंने तो अभी सर ट्राई ही नहीं किया क्योंकि मेरे बेटे का जो सर्टिफिकेट तो मैंने उसको आई की रिपोर्ट्स वगैरह ले रखी है तो उसपे ये था उसकी उसकी जो डिसेबिलिटी है, वो 25% है और सर ने बताया था की

01:05:14 Speaker 2

40% डिसेबिलिटी जिसकी होती उसका कार्ड बन जाता है, तो अभी मैंने इसीलिए ट्राई नहीं करा तो मुझे कुछ ये घबराहट होती है की भाई गवर्नमेंट हॉस्पिटल में चक्कर लगाना कोई आसान बात नहीं है और अकेली मीटिंग के लिए तो और मैं अक्चवली क्या है, जो आप

01:05:27 Speaker 1

कह रहे है ना वो एग्जैक्टली वो बात ये है मैंने कई बार देखा

01:05:31 Speaker 2

है। ये लोग डाक्यूमेंट्स इतने मांगते है की ये लाओ वो लाओ

01:05:33 Speaker 2

वैसे तो ये बोला

01:05:34 Speaker 4

रहे थो ये तो सही होने वाला है तुम जबरदस्ती से ये एक महा

01:05:37 Speaker 2

भारत है।

01:05:38 Speaker 5

पूरा

01:05:38 Speaker 2

हम बोलते हैं

01:05:39 Speaker 5

जंग लड़नी पड़ती है एक कार्ड बनवाने के

01:05:41 Speaker 4

लिए

01:05:41 Speaker 1

वो जान बूझी करते हैं आपने अभी आई ए एस ऑफिसर का पिछले 2 साल पहले भी आपने इश्यूस देखे होंगे की जहाँ पे डिफरेंटली एबल बताकर उन्होंने सरकारी पोस्ट के लिए आई ए एस क्लियर कर लिया।

01:05:51 Speaker 5

तो?

01:05:52 Speaker 1

बेसिकली वो पैसा चलने लग गया आज कल इस चीज को कर्प्शन आ रहा है, यहाँ पे कर्प्शन आ

01:05:56 Speaker 4

गया जबकि बच्चा बिल्कुल चल नहीं पा रहा है। जबरदस्ती बोलेंगे।

01:05:59 Speaker 2

ये है ही नहीं, डिसेबिलिटी ये सही हो सकता

01:06:02 Speaker 4

है चलो सही हो सकता है।

01:06:04 Speaker 2

सही हो सकता है नहीं हो रहा है।

01:06:05 Speaker 4

जभी माया में

01:06:06 Speaker 2

भेजा भेजा को अक्चवली

01:06:07 Speaker 1

जिनको प्रॉब्लम है, उनको एग्जैक्टली जिनको मिलना चाहिए उनको नहीं

01:06:10 Speaker 2

दे रहे

01:06:14 Speaker 1

फिलहाल मैं आप सबको अपने जो समय भी आप लोगों ने दिया उसके लिए धन्यवाद बोलना चाहूंगा ठीक है, आप लोगों ने काफी पेशेंटली सारे प्रश्नों का उत्तर दिया उन सब के लिए धन्यवाद

---

Audio file

[Parents 4-1.m4a](#)

Transcript

00:00:02 Speaker 1

गुड मॉर्निंग, मेरा नाम अनुज श्रीवास्तव है, आज सेवेंटीथ ऑफ सितम्बर 2025 को मैं दो मैडम जिनका नाम सबीना खातून माम् है और कसूर रियाज माम् है, कौसर रियाज माम् है।

00:00:16 Speaker 1

उनसे अपना डेटा कलेक्ट करने जा रहा हूँ जिसमें साइको सोशल चैलेंजेस इंटरव्यू स्केड्यूल है। और सबसे पहले मैं कौसर रियाज माम् से पूछना चाहूंगा कि क्या इस बात की परमिशन देती हैं कि मैं उनकी ऑडियो रिकॉर्ड कर सकूँ?

00:00:27 Speaker 2

जी मेरी तरफ से परमिशन जी

00:00:30 Speaker 1

सबीना खातून माम् आप जी जी, ठीक है सो मेरे कुछ 30 क्वेश्चन हैं।

00:00:37 Speaker 1

ओके दो पेरेंट्स हमारे साथ और जुड़े हैं, जिनमें से वसीम खान सर और फहीम खान सर हैं। वसीम साहब साहब से मैंने परमिशन लेना चाहूंगा ताकि मैं उनकी ऑडियो रिकॉर्डिंग कर सकूँ जी।

00:00:52 Speaker 1

और फहीम खान सर से भी मैं परमिशन लेना चाहूंगा ताकि मैं उनके ऑडियो रिकॉर्डिंग कर सकूँ। परमिटेड क्या क्वेश्चन है? वसीम सर से अपने बच्चों को प्रतिदिन कोई काम कराने में या पढ़ाई कराने में, पढ़ाई वगैरह पूरी कराने में आपको कुछ कौन कौन सी कठिनाइयों का सामना करना पड़ता है?

00:01:11 Speaker 3

बच्चा हमारा समझता ही नहीं है। पढ़ाई के बारे में जो भी कुछ उसको किसी भी काम के लिए कहते हैं, वो उसकी मतलब अटेंशन है ही नहीं। किसी भी काम में ऑलमोस्ट लगभग ना के बराबर ही।

00:01:22 Speaker 1

है।

00:01:23 Speaker 3

वो केवल वही काम समझता है या समझती है हमारी बच्ची जैसे की उसको खेल से रिलेटेड हो, बोल लेकर आओ बोल लेकर आ जाएगी।

00:01:31 Speaker 3

कुछ खाने पीने का आइटम पानी की बोतल लाओ शरीर में ऐसे तो फ्रिज खोल के पानी की बोतल ले आयेगी, श्रूटी की बोतल ले आयेगी ये उससे बोलो कटोरी ले आया ऐसे काम तो करते हैं उसे बोलेंगे पढ़ने को वो किताब विताब को फेंक देती है उसको मतलब इंटेरेस्ट ही नहीं है।

00:01:44 Speaker 1

पढ़ाई में नहीं है आपका?

00:01:46 Speaker 2

मेरा बेटा है वो।

00:01:49 Speaker 2

मतलब ये है की अपना मूड के हिसाब से वो कर लेता है, होमवर्क जरूर करता है लेकिन अपने मूड के हिसाब से करता है जब उसका मूड होता।

00:01:55 Speaker 1

है।

00:01:55 Speaker 2

तो ये होता है की पहले वो अपनी जो मतलब डेली का अपना एंटरटेनमेंट है बट?

00:01:58 Speaker 1

वो लेकिन आपके सामने प्रॉब्लम आ रही है। मूडीनेसा

00:02:02 Speaker 2

तो उस टाइम पे नहीं करेंगे जीस टाइम पे मैं कहूँगी अपने मूड के हिसाब से करता है वो।

00:02:06 Speaker 1

ठीक है।

00:02:07 Speaker 4

आपका।

00:02:08 Speaker 1

क्या?

00:02:08 Speaker 4

मूड के हिसाब से ही करता है और पहले तो थोड़ा पढ़ता भी था, सुनता भी था अभी इधर चारपांच महीने से देख रही हूँ बिल्कुल पढ़ाई से कोई मतलब ही नहीं है उसे।

00:02:17 Speaker 1

बट जैसे आपने कई बार बोला कि मूड नहीं है उसका बट आपको फिर भी पता है पढ़ाई करानी है। तब आपने बोला कि नहीं? बच्चे पढ़ो दैट उसके टाइम उसका बिहेव्यर।

00:02:24 Speaker 5

कुछ।

00:02:25 Speaker 2

बहुत वही होता है, इरिटेडिंग होता है, बहुत मुश्किल से बैठता है, बैठ जाता है, लेकिन बहुत मुश्किल से इतना उसका मतलब इंटेरेस्ट है उस टाइम पे नहीं होता।

00:02:32 Speaker 1

है, ज्यादा देर तक भी नहीं बैठ पाते।

00:02:33 Speaker 2

नहीं, जब उसका इंटेरेस्ट होता है तभी बैठता।

00:02:36 Speaker 5

है। जी आपका यही है सेम कंडीशन अपने मूड के हिसाब से ही है, अपनी मर्जी से सब कुछ कर लेता है।

00:02:43 Speaker 5

और जब हम उसको चीज़ बोलते हैं तो वो नहीं करेगा। जब मूड होगा तो वो सारी चीज़ करता है।

00:02:47 Speaker 1

ठीक है, मेरा दूसरा प्रश्न है, जब आप अपने बच्चे की, उसके लक्ष्य के अनुसार उसके क्षमता के अनुसार जो उसकी क्षमता है, जो उसकी स्ट्रेथ है, जितना वो कर सकता है, उसकी क्षमता के अनुसार कोई लक्ष्य को तय करते हैं, तब आपको कोई कठिनाई का सामना करना पड़ता होगा।

00:03:02 Speaker 3

कम रहता है, थोड़ा कर तो लेता है लेकिन फिर भी डाइवर्ट हो जाता है। मैएंड उसका अटेंशन नहीं है, कमडेबल नहीं है। वो फुल्ली कमेंड फॉलो नहीं कर पाता, हमारा बच्चा उसको समझाना पड़ता है। मानलो किसी डायरेक्शन में भेजना है तो हो सकता है अवॉइड ही कर जाये आपकी बात को।

00:03:16 Speaker 1

अच्छा अच्छा।

00:03:17 Speaker 3

तो उसको हमें लालच दे करके कुछ।

00:03:19 Speaker 3

जो टॉफी देंगे या सूजी देंगे या कुछ दुकान में ले जाएंगे, उसको घूमने का बड़ा शौक है।

00:03:24 Speaker 1

अच्छा।

00:03:25 Speaker 3

चलो तुम्हें स्कूटी पे घुमाना है तो वो कुछ काम में इंटेरेस्ट।

00:03:29 Speaker 1

है मैं सब मोटिवेशन देने से वो भी एक स्ट्रेटेजी।

00:03:32 Speaker 3

है। बिल्कुल हम वही फॉलो करते हैं जी।

00:03:36 Speaker 1

जी बहुत अच्छा करना है। आप जी आप बताइए।

00:03:38 Speaker 2

वो मेरे बेटे का भी इस मामले में यही है। वैसे तो ज्यादातर वो सुन लेता है कोई भी अगर मैं उससे कुछ काम करूँ, कोई छोटा मोटा टास्क घर में जैसे कुछ भी करना है सुना।

00:03:46 Speaker 1

लेता है मतलब सुन के करता भी है राइट।

00:03:48 Speaker 2

हाँ, कर लेता है, हाँ।

00:03:49 Speaker 1

जी।

00:03:49 Speaker 2

ज्यादातर उसका ये है कि वो मान लेता है।

00:03:51 Speaker 1

जी जी, बट उसको मोटिवेट मतलब किसी चीज़ का जोड़कर।

00:03:53 Speaker 2

हाँ होता है। मुझे कभी जैसे होता है कि मैं तुम्हारा मोबाइल बैन कर दूंगी, तुम्हें बिल्कुल नहीं टैच नहीं करना।

00:03:58 Speaker 1

अच्छा ठीक है।

00:03:59 Speaker 2

या फिर ये होता है कि पापा से तुम्हारी कंप्लेंट हो जाएगी?

00:04:01 Speaker 5

ठीका।

00:04:02 Speaker 1



है।

00:04:02 Speaker 2

तो कभी तो होता है की उसका वो मतलब फॉरिन सुन लेता है। कभी जब उसका मूड नहीं होता है तो फिर मुझे मुझे उसे थोड़ा ये बोलना है की मैं तुम्हारी कंठेन कर दूंगी। तुम्हारी ये चीजे बंद हो जाएँगी।

00:04:10 Speaker 1

हाँ, वो सबा

00:04:10 Speaker 2

हाँ, वो सुनता।

00:04:11 Speaker 1

है वो भी रेस्ट्रिक्शन स्ट्रेटेजीज है। अच्छा है की आप लोगों को कम से कम गंभीर है क्यों की आपके बच्चों को आपका टाइम अपने लिए शादी तो आपको मालूम चल रहा है, स्कूल में ही आ रहे है तो आपको थोड़ा बहुत ये नॉलेज हो गयी है की किस तरह से करना है।

00:04:21 Speaker 1

बट वही है कि जो इनिशियल पेरेंट्स होगा तो उनको प्रॉब्लम हो रही है कि भैया क्या कर कैसे करें इग्जैक्टली चलिए आप बताये जी।

00:04:28 Speaker 4

किसी चीज का लालच भी तो कर लेंगे, पढ़ाई नहीं करेंगे लेकिन घर में कोई काम बोल दो तो वो कर देंगे।

00:04:33 Speaker 1

अच्छा पढ़ाई कुछ हाँ पढ़ाई।

00:04:34 Speaker 4

कुछ हो।

00:04:35 Speaker 5

अरे नहीं, नहीं, पढ़ाई में बहुत कम है, लेकिन और चीजों में एक्टिव है।

00:04:39 Speaker 1

अच्छा।

00:04:39 Speaker 5

दंगा बहुत करता है मजाक हर किसी आदमी को छेड़ता है।

00:04:43 Speaker 1

अच्छा।

00:04:44 Speaker 5

कोई भी हो सब उसी के साथ मजाक करता है।

00:04:46 Speaker 1

अच्छा तो फिर अगला है मेरा प्रश्न जैसे आपके बच्चे को किसी संरक्षित गतिविधियों मतलब कुछ जो शेड्यूल काम है जैसे मैं बोल रहा हूँ कि बेटा यही करो, है ना जैसे कि मान लो कि।

00:04:57 Speaker 1

चित्रकारी करने को।

00:04:58 Speaker 5

या कुछ भी दो।

00:04:59 Speaker 1

दो कि भाई यही करना है। इस वक्त आधे घंटे के लिए तो उसमें कुछ कठिनाई का सामना करना पड़ता है।

00:05:03 Speaker 3

हाँ, ये तो है कमाण्डबल तो बिल्कुल नहीं है।

00:05:06 Speaker 1

मतलब अगर ऐसा बोलू तो फिर वो नहीं करतो।

00:05:08 Speaker 3

नहीं कमान्ड तो बिल्कुल नहीं है वो अगर हम उसे मोटिवेशन के थ्रू करा सकते हैं कमान्ड को वो फॉलो ही नहीं करता है। अच्छा आपका भी।

00:05:16 Speaker 2

अगर ये होता है की मुझे ये करना मुझसे करवाना है, मैंने कहा ये करना है तुम्हें इस टाइम में करना है तो मतलब ये है की किसी तरह से मजबूर हो के जब मैं सख्ती उस पर करती हूँ तो किसी तरह से मजबूर हो के कर ले, मैं उसकी कोई और बात नहीं सुना

00:05:28 Speaker 1

सकती। मतलब खाली आवाज से हाँ।

00:05:29 Speaker 2

हाँ, नहीं जी कोई मारपीट नहीं हाँ मतलब

00:05:32 Speaker 2

मतलब दौड़ा

00:05:33 Speaker 1

के बोला ताकि वो शायद

00:05:34 Speaker 2

मैंने उससे बोला कि आपको ये करना है

00:05:36 Speaker 1

हाँ

00:05:36 Speaker 2

इसके बाद ही आपकी बात सुनी जाएगी। तब वो करने के लिए मजबूर हो जाता है।

00:05:39 Speaker 1

जी जी आप

00:05:40 Speaker 2

नहीं मजबूर नहीं होता है मर्जी

00:05:42 Speaker 4

होती है जो भी

00:05:42 Speaker 1

तभी करेंगे जी आपका

00:05:43 Speaker 5

मूड की बात है हमारे वाले की।

00:05:45 Speaker 1

अच्छा वैसे ही स्टार्टिंग की वजह से।

00:05:48 Speaker 5

मन किया तो करेगा नहीं तो उससे कोई ताकत नहीं है, जो करवा ले।

00:05:52 Speaker 1

ठीक है। क्वेश्चन नंबर चौथा मेरा है जो अपने बच्चे के प्रयास की सराहना करने में कई बार वो अक्टिविटीज जो कर लेते हैं तो उसकी सराहना करने में भी कई बार होता है। ऐसे क्या होता है? इसमें प्रॉब्लम क्या है कि हम जब करते हैं तो बच्चे तक पहुँच पा रही है, नहीं पहुँच पा रही है, बच्चा समझ पा रहा है, नहीं समझ पा रहा है या फिर सराहना करने में हमने लेट कर दिया।

00:06:10 Speaker 1

या फिर सराहना करते हैं। गलत अक्टिविटी में वो इन्वॉल्व हो गया, तब तक हमने सराहना करते हैं। उसको लगता है चाहिए ये अक्टिविटी पे मेरे को सराहना मिल रही है तो इसमें कुछ कठिनाइयों का सामना करना पड़ता होगा।

00:06:18 Speaker 3

नहीं, इसमें तो खुशी होता है, मान लो किसी से अच्छा सराहना मतलब।

00:06:21 Speaker 1

एंग्रैक्टीली समझ रहे हैं।

00:06:22 Speaker 3

जब क्लैपिंग करते हैं तो वो बड़ी खुशी होती है तो उसको लगता है कि ये काम और कर दिया जाए।

00:06:25 Speaker 1

ठीक है, ठीक है, मतलब वो एंग्रैक्टीली समझ रहे हैं हाँ।

00:06:28 Speaker 2

वो भी अच्छे से समझ रहे हैं।

00:06:31 Speaker 1

समझ जाते हैं जी आपके में हाँ।

00:06:33 Speaker 5

ऐसे ही।

00:06:34 Speaker 1

है। अच्छा समझ जाते मतलब कोई प्रॉब्लम इसमें नहीं आ रही है। आपको सामना नहीं करना पड़ा ठीक है। पाँचवां प्रश्न मेरा है अपने बच्चों को अलग अलग तरीकों से, जैसे बोलकर, चित्रों से या हाथों से अपनी योग्यता।

00:06:48 Speaker 1

बताने में या दिखाने में कोई कठिनाई का सामना करना पड़ता हो। कई बार ऐसे बच्चे बोल नहीं पाते। स्पीच नहीं है तो फिर वो दूसरे तरीके से स्टार्ट करते हैं समझाने।

00:06:56 Speaker 3

को।

00:06:57 Speaker 1

हाँ, तो क्या कठिनाई आपको सीखाना भी आप क्योंकि आप उनको सीखा रहे हैं ना कि अब बोल तो पा नहीं रहे?

00:07:02 Speaker 3

हैं फिर आपको

00:07:02 Speaker 1

क्या?

00:07:02 Speaker 3

करना है, मेरा बच्चा बोल नहीं पाता है, वो क्या करता है? इसको प्र्यास लगी है।

00:07:06 Speaker 3

वो पानी की तरह इशारा कर देगा, हमें टैच करेगा, ऐसे ऐसे ठीक है, ठीक है, मान लो जैसे कोई पड़ोसी है उसको तो लगेगा। बच्चा नोच रहा है, वो नोच नहीं होता वो वो अक्चवली ऐसा है अटेंशन वो उसके पकड़ने की जो स्टाइल है, प्रिप है वो थोड़ी सी वैसी होती है की

00:07:21 Speaker 1

डाइटा

00:07:22 Speaker 3

होती है।

00:07:24 Speaker 3

हर एक बच्चों को लगता है की इसमें नोच रही है तो अब मान लो किसी बच्चे के पास बैठी है, वो नॉर्मल के साथ वो नॉर्मल बच्चों को कुछ बोलेंगे। मान लो जैसे उसके पास टॉयज है, वो चाहेंगे मैं भी लेकिन वो बच्चा क्या बोलेंगे की ये मेरे को मार रही है। वो अपनी मम्मा से कंफ्लैट करेगा, मम्मा मेरी उसकी मम्मा मुँह बनाएगी।

00:07:41 Speaker 3

क्यों मार रही है? तुम्हारा बच्चा पागल है ये है वो तो थोड़ा सा ही मेंटली उसको उसको तो नहीं पता लेकिन हमें लगता है मैंने की ये इसके बच्चे का बेहेवियर है क्योंकि डॉक्टर ने भी हमें ये बताया था की ये कुछ कहना चाहती है। बट ना तो आप ही समझ पाती हो आप तो चलो पेरेंट्स को कभी कभी समझ लोगे ना ये बच्चे के साथ इश्यू रहता है तो वो कैसे इर्रिटेट होता?

00:08:00 Speaker 1

है।

00:08:01 Speaker 3

क्योंकि वो बोल तो पानी रहा है और वो कह भी नहीं पा रहा है। वो इशारे से कहना चाह रहा है, आप भी नहीं समझ पाते हो। कई बार कई बार हम से भी होता है की हम चूक जाते वो क्या कहना है, क्या दिया जा रहा?

00:08:10 Speaker 1

है।

00:08:10 Speaker 3

बिल्कुल क्योंकि पानी वगैरह तो चलो इशारे समझ लिया।

00:08:13 Speaker 1

बट कोई नई चीज मांग रहा है कुछ?

00:08:14 Speaker 3

नई चीज है या।

00:08:16 Speaker 1

मार्केट में।

00:08:17 Speaker 3

बैलून है या कुछ है, हम नहीं समझ पाते जी जी जी।

00:08:21 Speaker 1

ठीक है, मतलब कठिनाई तो ठीक है।

00:08:23 Speaker 3

हाँ आपको बताना।

00:08:24 Speaker 2

मुझे थोड़ा कम प्रॉब्लम होती है क्योंकि इतना ये है कि इसका स्पीच ऐसे तो प्रॉपर नहीं है, लेकिन ये है कि फिर भी वो बोल के काफी चीजें बता देता है और बाहर भी ऐसा नहीं कि

00:08:31 Speaker 1

घर पे ही चीजें बट बाहर भी कभी हो कहीं जा रहा हो कहीं कुछ ऐसा हो जो एफडी।

00:08:36 Speaker 5

सारी रिकॉयरमेंट ये चीज़ बोलता है।

00:08:37 Speaker 2

बता देता।

00:08:38 Speaker 2

अगर वो जो बता नहीं पाता है उससे रिलेटेड कोई ऑब्जेक्ट है, कोई पिक्चर है या फिर हाथों के इशारे से वो मुझे बता सकता?

00:08:44 Speaker 5

है अच्छा।

00:08:45 Speaker 4

वो नहीं प्रॉब्लम नहीं, सही है, सिर्फ थोड़ा अटकते बोलते।

00:08:48 Speaker 5

हैं वो कोई भी चीज़ अपने।

00:08:49 Speaker 2

हाँ, बता देगा।

00:08:50 Speaker 1

ये।

00:08:50 Speaker 2

चाहिए।

00:08:51 Speaker 1

ठीक है आपके में।

00:08:52 Speaker 5

सेम कंडीशन है, बोल लेता है, बस नए जो वर्ड होते हैं ना उन्हें नहीं बोल पाता बाकी वो सब चीज जिसकी

00:08:58 Speaker 5

जितना वो जानता है ना उसकी नॉलेज में वो चीज तो अच्छे से रिपीट करता है साहब

00:09:02 Speaker 1

अच्छा तो नए शब्द

00:09:03 Speaker 5

जो नए शब्द होते है ना जीस चीजों का वो नहीं रिपीट कर पाता वो

00:09:06 Speaker 1

अच्छा अच्छा

00:09:07 Speaker 5

और जब वो बोलता है ना मतलब जैसे उसने एक चीज सीख ली ना तो काफी समय तक उसी को वो रिपीट करता रहता है बार  
बार

00:09:14 Speaker 1

अच्छा

00:09:14 Speaker 5

एक चीज सीख ली ना तो रिपीट ही करता रहेगा

00:09:17 Speaker 5

किसी स्थिति का नाम पता लग गया, कुछ भी पता लग गया उसको वही रिपीट है, बस जी जी ऐसे करता हूँ

00:09:24 Speaker 1

ठीक है अगला प्रश्न मेरा छठवाँ प्रश्न है अपने बच्चों को दोस्त बनाने और दोस्ती बनाए रखने में किनकिन समस्याओं का सामना  
करना पड़ता है?

00:09:34 Speaker 3

दोस्तों को ऐक्चुली क्या है?

00:09:36 Speaker 3

खाने पीने की जो दोस्त है वरना वो अपनी दुनिया

00:09:40 Speaker 1



अच्छा मतलब दोस्ती बनाने में तो प्रॉब्लम है।

00:09:42 Speaker 3

प्रॉब्लम है, वो सोशली नहीं हो। पता है बच्चा हमारा की भाई अच्छा कुछ खाने पीने की चीज़ आपके पास है कुछ टॉयज़ है तो आपके पास आ जायेगा वो वो भी जब तक उसका मन है कई बार उसको खाना खिला रहे है बीच में रोट के चला जायेगा उसको जबरदस्ती।

00:09:56 Speaker 3

पकड़ के चलाना पड़ता है। हमें ये नहीं पता की उसका पेट भरा या नहीं हो रहा क्योंकि उसको भागना होता है की एक बार बन जाता है। बीच में तो ये भी एक प्रॉब्लम है।

00:10:06 Speaker 2

मेरा बेटा जो है वो इसिली लोगों से मिल लेता है।

00:10:08 Speaker 1

अच्छा दोस्ती वगैरह सब आसपास में भी, स्कूल में भी, कम्युनिटी में भी सब जगह पे दिन भर बाहर मतलब।

00:10:13 Speaker 1

बाहर भी खेलता है, स्कूल में नहीं।

00:10:15 Speaker 2

बाहर तो ऐसे नहीं जाता लेकिन आस पास के बच्चे मतलब वैसे दूर से उनका मतलब कम्यूनिकेट होता है। जैसे कहीं।

00:10:21 Speaker 1

पर रोज़ खेलने के लिए बच्चे बाहर निकलते हैं, 1 घंटे के लिए भी आते हैं।

00:10:23 Speaker 2

नहीं नहीं, बाहर का नहीं वो।

00:10:25 Speaker 1

जरूरी है। हाँ हाँ, नहीं, नहीं।

00:10:28 Speaker 2

दोस्ती कर लेते।

00:10:29 Speaker 1

हैं।

00:10:30 Speaker 4

चल नहीं पाता, इसीलिए मैं बाहर भेजती भी नहीं हूँ।

00:10:32 Speaker 4

थोड़ी चलने में प्रॉब्लम नहीं है। वीडियो थैरेपी।

00:10:34 Speaker 3

चलने का तो मेरी बच्ची के साथ इश्यू है क्योंकि वो थोड़ा बहुत शोक ही चलती है। अगर हल्का सा भी टच हो जाए तो गिरने का खतरा भी नहीं है। मेरे पास नहीं है मेरा बच्चा खेल रहे हो और वो।

00:10:46 Speaker 1

सब अच्छा लगा।

00:10:48 Speaker 3

रहा है तो चोटी लग जाएगी।

00:10:49 Speaker 1

उसकी।

00:10:50 Speaker 1

लेकिन चलिए कम से कम फिर भी इनको एक बार बाहर ले के जाएं आप साथ में रहें देन वापस भले ही ले आए थोड़ा सा बाहर।

00:10:55 Speaker 5

सेम कंडीशन है। चलने में थोड़ी प्रॉब्लम है ना तो कभीकभी पार्क में तो ले जाते हैं उसो।

00:11:00 Speaker 1

अच्छा ठीक है।

00:11:00 Speaker 5

बाकी वो ज्यादा किसी से इतना घर का तो सबसे वो रहता है।

00:11:04 Speaker 1

बट बाहर बाहर का नहीं जाता है, मतलब दोस्ती वगैरह भी मिलता है। ऐसा कुछ खास नहीं है।

00:11:10 Speaker 1

ठीक है, अगला प्रश्न है मेरा सातवाँ प्रश्न अपने बच्चों को सामाजिक कौशल सिखाने में जैसे घर में सामाजिक चीजें होती हैं ना उठना, बैठना, साथ में खाना बैठना, शेयर करना, मिलकर खाना राइट, एक दूसरे के साथ अपने बारी का इंतजार करना, एक दूसरे के साथ बारी का इंतजार करना, कई बार मिलकर खेलना, मिलकर काम करना।

00:11:29 Speaker 1

इसमें कोई काम करने में उनको कठिनाई का सामना करना पड़ता है और खासकर जब आप सीखा रहे हैं कि नहीं बेटा ये मिलके करो या फिर मिलके खाओ मिलके बांट के खाओ है ना तो वो थोड़ा सा समस्या आती है उसमें।

00:11:38 Speaker 3

हो। समस्या रहती है क्योंकि वो उसकी मतलब एक गैरेंटी नहीं है की वो टिक के बैठे आपके साथ हम खा रहे हो या खेल भी रहे हो। मतलब खेल भी रहे हो उसकी पसंद का।

00:11:49 Speaker 3

तो उसके मतलब मूड के ऊपर है की वो बीच में से भी उसको पुट करके जा सकता है तो हम उसको फिर बुलाते हैं की उसकी मम्मी पकड़ कर आती है या उसका भाई पकड़ कर लेके आता है उसको ये पता है की भाई यहाँ सब खा रहे हैं वो चली जाएगी।

00:12:02 Speaker 1

अच्छा ठीक है आपका।

00:12:04 Speaker 2

मेरे भाई जो है ना काफी मतलब इस मामले में काफी समझदार है।

00:12:07 Speaker 1

अच्छा।

00:12:08 Speaker 2

शेयरिंग की बहुत ज्यादा आती है जैसे अपनी सिस्टर को शेयर करता है।

00:12:11 Speaker 1

और बाहर दोस्त वगैरा।

00:12:13 Speaker 2

अगर हम सोचेंगे कि उनसे शेयर करो तो वो शेयर करेगा।

00:12:16 Speaker 1

अच्छा खुद से इनिशिएट करते हैं कभी बच्चे।

00:12:18 Speaker 2

मतलब ये है मतलब वो काफी हद तक नॉर्मल है। अच्छा जैसे नॉर्मल बच्चा होता है ना?

00:12:24 Speaker 1

ठीक है, ठीका

00:12:25 Speaker 2

है। जी जी सही है।

00:12:28 Speaker 2

वो भी शेयर कर लेता।

00:12:29 Speaker 5

है जबा

00:12:30 Speaker 2

उनका मूड हो तो।

00:12:31 Speaker 4

मूड नहीं है तो नहीं देगा।

00:12:32 Speaker 1

अच्छा।

00:12:33 Speaker 5

यही कंडीशन है मूड के ऊपर है, बाकी नॉर्मल रहता है, वो ऐसे हाइपर नहीं है, किसी चीज़ में मिलके खेलते हैं। हमारे वाले बच्चे के अंदर तो ये कंडीशन है वो देखने में मतलब नॉर्मल सा लगता है बस उसे ना चीजों की सही समझ नहीं है।

00:12:47 Speaker 5

कैसे क्या करना है बाकी खाना पीना सारा वो सब कुछ अपना कर लेते।

00:12:52 Speaker 1

है। मिल बांट के कर लेते है।

00:12:53 Speaker 5

हाँ सब एंड।

00:12:54 Speaker 1

देन अगला प्रश्न आठवां प्रश्न आपके बच्चा जब कोई समूह गतिविधियों में खेल रहा है, ऐसे ग्रुप अक्टिविटीज जब कई बार हमारी होती है उसमें वो पार्टिसिपेट कर रहा हूँ खेल रहा हूँ मिलके राइट ऐसी बहुत सारी चीजें होती हैं, हम ग्रुप में कराते हैं।

00:13:07 Speaker 1

इसमें कोई कठिनाई का सामना करना पड़ता है और आपको बताना पड़ेगा कि नहीं। ग्रुप में खेलो मिल के खेलो इनिशियल।

00:13:13 Speaker 3

तो थोड़ी दिक्कत थी लेकिन जब यहाँ से आए हैं ग्रुप में हुए हैं तो थोड़ा थोड़ा वो

00:13:16 Speaker 1

स्कूल में आने की वजह?

00:13:18 Speaker 3

से थोड़ा सा।

00:13:19 Speaker 1

वैसे क्या है मतलब? वो खेल पाते नहीं खेलते।

00:13:21 Speaker 3

हाँ, वो तो खेद ही अलग रहता है चीजें फेंकना ये करना, वो खेलना।

00:13:26 Speaker 1

आपा

00:13:28 Speaker 2

ये है की वो अब जैसे ये बाहर तो जाता नहीं है लेकिन अपने जैसे कज़िन्स है अब वकेशंस में इकट्ठे होते है सब लोग खेलते है मिलके ये मैंने स्कूल में भी देखा है तो ग्रुप में वो मतलब अक्टिव रहता।

00:13:43 Speaker 4

है।

00:13:43 Speaker 1

अच्छा थोड़ा गुस्सा जल्दी आ जाता है ग्रुप में।

00:13:46 Speaker 4

खेलता है लेकिन फिर ज्यादा देर नहीं 5 मिनट ही खेलेगा, हट जाएगा वो

00:13:50 Speaker 1

अच्छा मतलब एकदम से अलग हो जाएगा हाँ

00:13:52 Speaker 4

एकदम से अलग हो जाएगा

00:13:55 Speaker 5

यही है ये ग्रुप में मतलब ज्यादा देर नहीं है

00:13:58 Speaker 1

अच्छा

00:13:58 Speaker 5

झेल लेगा लेकिन ये पता नहीं थोड़ी देर

00:14:03 Speaker 5

मूड की बात है

00:14:04 Speaker 1

अच्छा अपने बच्चे को सहयोग का महत्व समझाने के लिए की भाई मिल कर खेलो, क्योंकि इस पिछले वाले से रिलेटेड है। ये सहयोग का महत्व समझाने के लिए इम्पोर्टेंट है। आप लोग किस तरह से बोले मोटीवेट करते है की नहीं? बेटा मिल कर खेलो तो उसमें आपको कई बार कठिनाई का सामना करना पड़ता है। समझ पता है नहीं समझ पता है वो है ना?

00:14:19 Speaker 3

बहुत ज्यादा कठिनाई क्योंकि वो समझ ही नहीं पाता की।

00:14:22 Speaker 3

एक जगह रहना है उसको के बच्चे आते हैं वो जैसे नोचने वाला होता है बच्चों को लगता है की कभी कभी नोच भी लेती है वो बच्चों को।

00:14:29 Speaker 1

हाँ, वो नहीं चाहते क्योंकि ऐसे इनवॉल्टरी है ना उसके लिए स्ट्रिप है, अक्चवली टाइट हो चूका है।

00:14:34 Speaker 3

एज़ैक्टली।

00:14:35 Speaker 1

तो वो उसकी वजह से वो सब वो हाथ में अक्टिवेट करेंगे तो थोड़ा सा ये होगा अच्छा आपका वो।

00:14:42 Speaker 1

ये ये था कि समूह गतिविधियों, बच्चों के साथ सहयोग का महत्व समझाने के लिए आपको किन कठिनाई का सामना करना पड़ता है मुझे ये।

00:14:48 Speaker 2

ज्यादा मुश्किल नहीं होती है।

00:14:49 Speaker 1

अच्छा मतलब वो ग्रुप में आप बता रहे हैं खेलो तो क्या होता है जी आपका मैं ग्रुप में खेल?

00:14:54 Speaker 4

लेता है।

00:14:54 Speaker 1

खेल लेते हैं। बट आपने इससे पहले बताया था कि थोड़ा बहुत कभी भी हाँ।

00:14:57 Speaker 4

वो।

00:14:58 Speaker 4

खेलता है लेकिन उनकी मर्जी है वो छोड़ के भी भाग सकता है बीच से।

00:15:01 Speaker 1

हाँ।

00:15:01 Speaker 4

तो ये नहीं की लास्ट तक टीका रहेगा।

00:15:03 Speaker 1

नहीं उसमें आप समझाएंगे ना की लास्ट तक टिके रहो, मिल के खेलते रहो तो फिर आपको कई बार संस्थान का सामना कोई समझ।

00:15:09 Speaker 4

नहीं मानेगा वो छोड़ दिया, बीच में से तो छोड़ दिया।

00:15:12 Speaker 1

अच्छा अच्छा जी आपके में

00:15:14 Speaker 5

जी, वो

00:15:15 Speaker 5

खेल ग्रुप में

00:15:16 Speaker 1

ग्रुप में अक्सीडेंट जी दसवां प्रश्न है मेरा जब आपका बच्चा साथियों द्वारा अस्वीकृति या गलतफहमी का शिकार हो जाए, कई बार होता है ना अस्वीकृति भाई हमारे साथ मत खेलो, हमारे साथ इन्वॉल्व मत हो, हमारा मत खड़े हो है ना? कई सारे कम्यूनिटी में आपको देखने को देख लेता है तो उस टाइम पे आपको क्या क्या कठिनाई का सामना करना पड़ता है।

00:15:34 Speaker 3

बच्चा कभी कभी रोता भी है। अब जैसे मान लो बच्चे खेल रहे हैं और फिर उसको फिर मुझे कहीं बाहर ले जाना पड़ेगा या दूसरा टॉय या ऐसा करना पड़ेगा ताकि खुश हो जाये वो?

00:15:45 Speaker 1

जी जी आपके ना?

00:15:47 Speaker 2

मुझे भी उसको समझाना पड़ता है। कई बार ऐसा होता है कि मतलब आपस में बहन भाई खेल रहे हैं वो लोग।

00:15:51 Speaker 2

तो हो जाता है छोटी बेटी है तो थोड़ा रीटेड हो जाती है, वो उसे मना करती है। तुम भी आपस में लड़ाई होती मुझे उसको समझाना पड़ता है। कई बार होता है कि वो मान जाता है। मैं उसको किसी और चीज़ में इन्वॉल्व कर देती हूँ।

00:16:03 Speaker 1

अच्छा।

00:16:04 Speaker 2

तो वो हो जाता।

00:16:04 Speaker 1

है जी जी आप कई बार।



00:16:06 Speaker 4

नहीं मानते।

00:16:07 Speaker 1

नहीं।

00:16:07 Speaker 4

देना पड़ता है वो कभी कभी मान भी जाता है।

00:16:10 Speaker 4

जब मूड ठीक हो तो समझा दो तो।

00:16:12 Speaker 2

समझा।

00:16:13 Speaker 4

जाएगा।

00:16:14 Speaker 1

अच्छा आपके में।

00:16:15 Speaker 5

जी, वो खेलता।

00:16:17 Speaker 1

है। अच्छा एंड देन ये आपका आपके बच्चों को पढ़ाई या दूसरी गतिविधियों में प्रेरित करने के लिए मोटिवेट करने के लिए मोटिवेशन देने के लिए एंजैक्ट मोटिवेशन ऐसा होना चाहिए जो बच्चों को समझ में आया एंजैक्ट में।

00:16:29 Speaker 1

तो उसमें कुछ समस्याओं का सामना करना पड़ता होगा।

00:16:32 Speaker 3

अभी तो समस्याएं आ ही रही हैं क्योंकि अभी तो उसको दो या तीन महीने हुए हैं यहाँ पर आए।

00:16:37 Speaker 1

हुए।

00:16:37 Speaker 3

बट लगता है कि लिटिल लिटिल प्रोग्रेस पॉसिबल है, बट बिकॉज वी अरे फेसिंग दी डिफिकल्टीज तो

00:16:45 Speaker 1

उसमें क्या प्रॉब्लम क्या से आती है? मतलब कैसे आपको?

00:16:47 Speaker 3

कुछ समझ ही नहीं पाता है बच्चों को

00:16:49 Speaker 1

जैसे आप मोटिवेट कर रहे हैं। मोटिवेशन मेरे को पता नहीं है जी जी।

00:16:53 Speaker 3

केवल इंस्ट्रेड वाला ही मोटिवेशन समझ पाता है जैसे खेल कूद या खाने पीने की है ही नहीं। इंस्ट्रेड, उसमें अपनी मॉम वगैरा के जीतने, कलर्स वगैरह सब फेंक दिए

00:17:04 Speaker 1

अच्छा अच्छा

00:17:05 Speaker 3

किताब किताब वो

00:17:06 Speaker 3

बड़े भाई की किताब भी फाड़ देती है तो फिर एक बार हम नहीं रोते तो बड़ा भाई उसको मार भी देता है, लेकिन हम जैसे बोले की नहीं मारा, लेकिन हमें लगता है की उसने मारा कोई वो रोती है। हाँ

00:17:15 Speaker 1

हाँ हाँ, बिलकुल

00:17:16 Speaker 3

बिलकुल हाँ, तो बिलकुल वो भी छोटा है उसको

00:17:19 Speaker 1

हाँ, बिलकुल

00:17:20 Speaker 3

मतलब तुम भी नहीं कह सकते

00:17:22 Speaker 3

लेकिन वो कहता है मैंने मारनी बट वो मार रहा था, वो भी वो।

00:17:26 Speaker 1

जी।

00:17:26 Speaker 2

सर एक बार रिपीट करेंगे।

00:17:28 Speaker 1

मेरा ये क्वेश्चन था कि बच्चों को प्रेरित करने के लिए चाहे पढ़ाई लिखाई में हो या किसी गेम में हो, प्रेरित करने के लिए आपको कई सारी कठिनाइयों का सामना करना पड़ता है। हाँ।

00:17:37 Speaker 2

होता है कभी कभी मुझे।

00:17:39 Speaker 2

क्योंकि ये होता है कि उसको मतलब पढ़ाने के लिए थोड़ा सा एफर्ट्स मुझे करने पड़ते हैं तो मुझे उसे बोलना पड़ता है कि आप अगर नहीं पढ़ेंगे तो कैसे रह जाएंगे? आपसे छोटी बहन है। देखो वो कितना अच्छा पढ़ रही है। ये सब चीज़ है तो मुझे उसे करना पड़ता है। एफर्ट्स मुझे करना ही पड़ते हैं उसके लिए।

00:17:52 Speaker 5

ठीक है, आप।

00:17:53 Speaker 4

ना ऐसे ही कहते।

00:17:54 Speaker 5

हो?

00:17:55 Speaker 4

माम् अक्सर उनका मूड होता है तो पढ़ लेते हैं, जैसे चित्र दिखाके पढ़ाऊं।

00:17:59 Speaker 4

ये आपको पूरा समझ लो।

00:18:00 Speaker 1

वो तो चित्र रेखा के पढ़ाने का बट उसको आपको प्रेरित करना है ना कि पढ़ो अभी पढ़ो।

00:18:04 Speaker 4

नहीं मानेगा, उनकी मर्जी होगी तो वो पढ़ेगा नहीं, मर्जी है।

00:18:07 Speaker 1

तो मैं उसे नहीं पढ़ा सकती जबरदस्ती अच्छा अच्छा आपका मैं।

00:18:11 Speaker 5

यही कंडीशन है मूड के ऊपर है।

00:18:13 Speaker 1

पूरा मूड में आता।

00:18:14 Speaker 5

है या तो खेलता है जब उसका खुद मूड होता है ना?

00:18:17 Speaker 5

तो वो खुद से अपनी पेंसिल बैग उठाकर लाएगा, पढ़ने बैठ जाएगा, जब तक मन होगा फिर वो खेल में लग जाएगा। अपने हमारा वाला ना अच्छी चीजें बहुत कम समझता है। तुम गलत हरकत कर दो, एक दम सीख जाता है। अच्छा ठीक।

00:18:31 Speaker 4

पढ़ाई लिखाई में।

00:18:32 Speaker 5

जल्दी जी हाँ, कुछ डिश के सामने कुछ ऐसी गलत हरकत करो।

00:18:36 Speaker 5

जो हँसी मजाक हो वो एक दम कैछ कर लेता है, गलत चीज को अच्छी बहुत मुश्किल पकड़ता है। जी जी।

00:18:44 Speaker 1

प्रश्न नंबर 12 है मेरा अपने बच्चों की आलोचना करने से बचते हुए कई बार आपको भी आ रहा है की मैं इसकी आलोचना करूँ? फिर कई बार मुँह से निकल जाता तो बधाई या तू नहीं कर पा रहा तो कह रहा बेवकूफ है या कुछ भी चीजें हो सकती आलोचना को बहुत तरह की आलोचना होती है।

00:18:56 Speaker 1

चंदन उससे बचते हुए अपने आप को ध्यान रखते हो की नहीं, वैसा नहीं करना। आलोचना नहीं करना है और सिर्फ उसकी प्रगति पर ध्यान देते हुए आपको कुछ कठिनाई का सामना करना पड़ता है और।

00:19:06 Speaker 3

कई बार देखो बी अरे ह्यूमन्स नॉट एबल कई बार ऐसा होता है की हम बोल लेते है उल्टा सीधा क्योंकि उसने क्या रिपोर्ट फेंक दिया है अभी?

00:19:13 Speaker 3

मोबाइला

00:19:14 Speaker 1

फ्रस्ट्रेशन आ ही जाता है वो जनरलली।

00:19:16 Speaker 3

अभी मोबाइल लेकर आया, उसने तोड़ दिया। दिमाग खराब हो जाता है किंतु तो पागल ही है। बिलकुल हाँ बिलकुल तो हाँ, भले ही मैं मारू लेकिन इतना स्टेशन नहीं है लेकिन उसको थोड़ी देर बाद लगता है की उसको पता ही नहीं है। जीजी तो रियलाइज होता है हमें।

00:19:31 Speaker 3

हालांकि उस टाइम पे तो हमने उसको बोल दिया उल्टा जी।

00:19:38 Speaker 2

हाँ, ऐसे ही होता है। दरअसल क्या है कि मैं सिंगल मतलब अकेली रहती हूँ, बच्चे होते हैं मेरे साथ तो मुझे सारी रेस्पॉन्सिबिलिटी घर पर बात भी होती है तो मैं कई बार बहुत ज्यादा भी हो जाती है। बहुत ज्यादा क्यों इतना?

00:19:52 Speaker 2

होता है की मैं मतलब उसको कभी कभी बोल देती हूँ ऐसा या फिर एक आध थप्पड़ भी लगा देती हूँ लेकिन हाँ बाद में होता है थोड़ा रियलाइज की। अगर ये नॉर्मल होता तो ये ऐसा बिहेव नहीं करता। ये सब बच्चों की तरह नॉर्मल होता तो थोड़ा सा मुझे रिग्रेट होता है।

00:20:06 Speaker 5

जी जी।

00:20:06 Speaker 2

लेकिन यही कभी कभी करना पड़ता है।

00:20:08 Speaker 5

जी जी

00:20:09 Speaker 1

आप क्या कहना

00:20:10 Speaker 4

चाहेंगे?

00:20:10 Speaker 4

बहुत गुस्सा हो जाता है, मुझे भी गुस्सा आता है तो मैं भी मारती हूँ वैसे ही लेकिन मारने से और ज्यादा हक हो जाता है जैसे एक बच्चा होता है, जाता है ना सिमारत और चिन्हायेगा ये और तूर खोर मचाएगा और प्यार से समझाओ तो कभी तो समझ भी जाता है कभी नहीं भी समझता है

00:20:25 Speaker 5

ठीका

00:20:26 Speaker 1

है

00:20:27 Speaker 5

जी अगर कोई गलती कर रहा है और उसे डांट दिया

00:20:30 Speaker 5

सही से डांट दिया तो वो नाराज हो जायेगा जा के कमरे में लेट जाता है

00:20:34 Speaker 1

अच्छा

00:20:35 Speaker 5

उसे पता है कि डांट दिया, डर जाता है मतलब पिटाई हो गयी छुप जाता है

00:20:40 Speaker 1

अच्छा

00:20:40 Speaker 5

लेकिन थोड़ी देर बाद जब उसे कोई दिखता है, कोई मनाने नहीं आ रहा खुद ही आ जाता है फिर वो डोर अच्छा

00:20:47 Speaker 3

अच्छा

00:20:48 Speaker 3

ज्यादा वो नहीं कर पाते ज्यादा बिल्कुल हाँ

00:20:50 Speaker 1

ज्यादातर

00:20:51 Speaker 3

रसायना में फीलिंग जो है एकदम ऐसी होती है पूरे है

00:20:54 Speaker 5

शुद्ध है मारने वाला तो समझता है सारी चीजों को इमोशन को और उसे फोन दे दो ना, फोन का तो कुछ भी दे दो, कैसे ही फोन दे दो उसको चलाता है

00:21:03 Speaker 2

जी जी

00:21:03 Speaker 3

जी

00:21:04 Speaker 2

फ़ोना

00:21:04 Speaker 5

तो उसे जो चीज चाहिए ही नहीं डांस का, किसी को उनको बोल के

00:21:08 Speaker 5

ठीका

00:21:08 Speaker 1

है

00:21:09 Speaker 5

मांगा लेते हैं क्योंकि उसकी मनमर्जी है

00:21:10 Speaker 1

जी मैं समझ सकता हूँ अगला तेरहवां प्रश्न है मेरा अपने बच्चों की छोटी छोटी सफलताओं पे बार बार सकारात्मक चीजें बोलना मोटीवेट करना गुड वेरी गुड बहुत छोटी छोटी चीजों पे जब कर लेते है क्योंकि हम क्या होता है ना? बड़ी चीज करने पे ही हम ज्यादातर मोटीवेट होते है क्योंकि हम सोचते है की एस एक्स्पेक्टेसन के रखते पड़ोसी का कहीं से कर लिया

00:21:26 Speaker 1

बट ये बच्चा छोटा चीज भी कर ले तो इनके लिए भी बहुत बड़ा टास्क होता है तो छोटी छोटी चीजों को प्रेरित करने में या है ना? प्रोत्साहित करने में आपको कुछ कठिनाई का सामना करना पड़ता हो। आप उस डीटेलिंग को नोट कर पाते हैं की नहीं कर पाते।

00:21:37 Speaker 3

नहीं, वो तो फिर छोटे छोटे हम उसको एंकरेज करते हैं इन चीजों को और उसकी टाईड टु टाइम।

00:21:44 Speaker 3

तारीफ भी करते है तो वो थोड़ा समझता वहाँ भी ये मेरी तारीफ हो रही है तो उस चेहरे पे भी क्यूटनेस आती है, स्माइल आती है। जी जी जी।

00:21:54 Speaker 2

जी मैं उसकी जरूर तारीफ करती हूँ जो पॉजिटिव चीजे होती है और जो मुझे लगता है की हाँ मैं उसको जरूर मतलब बहुत अच्छे से करती हूँ।

00:22:03 Speaker 1

जी जी जी।

00:22:05 Speaker 4

ऐसे ही तारीफें करने से खुश हो जाएगा। फिर से दोबारा से वो काम करेगा।

00:22:09 Speaker 1

अच्छा।

00:22:09 Speaker 4

बहुत खुश।

00:22:10 Speaker 1

होता।

00:22:12 Speaker 5

है जी देखिए थोड़ा कभी समझ भी जाता है कभी नहीं भी समझता है बट वही कि हर पूरी चीज समझता है। हर छोटी चीज ऐसा नहीं कि हमने उसकी तारीफ की और वो समझ गया नहीं।



00:22:21 Speaker 4

समझ जाता है तारीफ करो तो वो बहुत खुश है।

00:22:23 Speaker 4

समझा।

00:22:23 Speaker 1

जाता।

00:22:23 Speaker 5

है आपका? लेकिन हाँ कभी समझ भी जाता है कभी नहीं भी आता है अपना ठीक है, ये नहीं कि मतलब हर चीज़ हमसे कहीं मेरे को समझ जाये तो बात ही क्या है?

00:22:32 Speaker 1

हाँ जी जी, चौदहवां प्रश्न है, मेरा अपने बच्चों की असफलता के बाद भी कई बार कुछ काम दिया हुआ है असफल हो गया उस चीज़ में।

00:22:39 Speaker 1

मान लीजिये कि किचन से पानी लाने को बोला वही गिलास गिर गया या कुछ भी हो गया तो असफलता कई बार मिल जाती है देन उसके बाद नया कार्य को देने में क्योंकि डर लगता है ना फिर अगला फिर दोबारा उसको वही काम दो तो उसमें कुछ कठिनाई का सामना करना पड़ता है।

00:22:50 Speaker 3

उसमें वो तो कठिनाई नहीं होती। ऑब्बियेक्स्ली की भाई कोई काम बिगाड़ दे ऐसे लगता है की दोबारा भी काम ना बिगाड़ दे। इसको रहना बेकार है। जी।

00:22:57 Speaker 1

जी आप कह रहे हैं।

00:22:58 Speaker 2

नहीं अगर जैसे कुछ भी काम है तो मैं उसको बोलेंगे अगर उससे खराब हो भी गया है तो ये होता है की नेक्स्ट टाइम फिलहाल तो मैं उसको कहती हूँ की तुमने इस तरीके से कराया, लेकिन मैं रिस्क ले लेती हूँ क्योंकि जब तक मैं उसे नहीं कहूँगी तो वो सीखेगा कैसेस जी तो इसलिए मैं उसको मतलब वो टास्क दुबारा रिपीट कराती रहती।

00:23:13 Speaker 1

हूँ जी।

00:23:14 Speaker 4

मैं ये रिपीट कराती हूँ अगर कोई चीज़ गिर जाएगा उससे।

00:23:17 Speaker 4

वो सॉरी भी बोलेंगे, उठा के भी लाएगा, अच्छा अच्छा उठा लेता है, फिर दोबारा कोशिश करेगा कि ये मैं सही से?

00:23:23 Speaker 1

करूँ?

00:23:23 Speaker 5

सेम कंडीशन है। अगर गलती हो जाती है तो सॉरी बोलता है वो अपनी मम्मा से मतलब उसकी मम्मा कहती है नाराज होने का वो दिखाती है उसे तो वो समझ जाता है कि मम्मा नाराज है, फिर वो बार बार सॉरी सॉरी करता रहेगा जी।

00:23:35 Speaker 1

जी ठीक है।

00:23:37 Speaker 1

पन्द्रहवाँ प्रश्न मेरा है अपने बच्चों को धैर्य और सकारात्मक सोचने के लिए प्रेरित करना ना की भाई पॉजिटिव रहो लाइफ में और अच्छा धैर्य आये आपको कुछ भी चीजें नहीं मिली तो कोई बात नहीं। धैर्य के साथ शांति या तो उसको एक्सेप्ट करोगे नहीं है ये सब चीजें तो ये सब चीजों का उदाहरण बनने के लिए आपको कुछ समझाना पड़ता हो, तब डिफिकल्टी होती हो।

00:23:57 Speaker 3

उसमें धैर्य है ही नहीं, इम्पल्सिव रहता है।

00:24:01 Speaker 1

तो फिर वह सकारात्मक बनने के लिए भी।

00:24:04 Speaker 3

बहुत ज्यादा कठिन नहीं है क्योंकि इन बच्चों के साथ ये थोड़ा सा इश्यू रहता है कि इनके अंदर।

00:24:08 Speaker 2

पेशेंस नहीं।

00:24:09 Speaker 3

होता पेशेंस होता ही नहीं है।

00:24:11 Speaker 3

एक तो इनपलसिव होते हैं, लोगों को दिक्कत है।

00:24:14 Speaker 1

जी जी आपका कहना।

00:24:15 Speaker 2

है नहीं, मैं तो उसको अगर उसे कोई चीज़ चाहिए तो तुम अभी थोड़ा सा मतलब रुक जाओ। ये है किसी भी चीज़ के लिए पेशेंस बहुत जरूरी है, हालांकि उसमें है नहीं।

00:24:25 Speaker 2

अगर उसे यह लग गया कि मुझे यह ट्राय लेना है तो मैं मुझे भी ज़िद हो जाती है कि नहीं? मैं अभी नहीं दिलाऊंगी मैं दिलाऊंगी तो अपनी बात यह है कि मैं उसको यह उस टाइम पे नहीं पेशेंस रखो। इससे उसमें यह चीज़ आए की नहीं तो मैं थोड़ा सबर रखूंगी। तो मैं यह कोशिश करती हूँ कि नहीं इसमें पेशेंस आए जी।

00:24:41 Speaker 5

जी जी।

00:24:41 Speaker 2

हाँ, मेरी कोशिश यह रहती।

00:24:42 Speaker 4

है जी हाँ जी, इसलिए।

00:24:44 Speaker 4

जैसे अभी मांगा तो बता दो थोड़ी देर बाद ला दूंगी, कभी तो मान भी जाता है कि शाम हो जाएगी तो लाएगी फिर वो भूलेगा नहीं, बारबार उस चीज़ को मांगेगा, 2 दिन तक उसे रटते रहेंगे।

00:24:56 Speaker 1

अच्छा।

00:24:57 Speaker 4

फिर लाके दूँ फिर वो शांत हो जाएंगे?

00:24:59 Speaker 1

अच्छा अच्छा आपको।

00:25:00 Speaker 5

में जी जो चीज़ चाहिए उसको रिपीट करता है, ज़िद करता है उसकी।

00:25:03 Speaker 1

अच्छा अच्छा तो मतलब वो।

00:25:05 Speaker 1

रहेगा ठीक है देन मेरा सिकसटीन्थ प्रश्न है सोलहवां अपने बच्चों को उसकी भावना पहचानने में, क्योंकि भावना एक ऐसा शब्द होता है जो कि छोटे से लेकर बहुत बड़े तक होता है। छोटा बच्चा होता है, जब पैदा होता है तो रोना और

00:25:16 Speaker 1

उसको हसना। ये दो भावनाओं उनके अंदर होती है पर धीरे धीरे हमारे अंदर बहुत सारी भावनाओं डेवलप होती जाती है। लास्ट तक हमारे अंदर ईशा तक की भावना आ जाती है। बड़े होने की तो ऐसी भावनाओं को समझने में और उसको कंट्रोल करने में है ना तो उसमें आपको कई सारी कठिनाई का सामना करना पड़ता।

00:25:32 Speaker 3

है। हाँ ऑब्जिक्टिविटी इसमें थोड़ी दिक्कत आती है।

00:25:35 Speaker 3

क्योंकि उसकी इमोशन्स कुछ तो हम समझ पाते हैं बट सारी ये समझता है।

00:25:40 Speaker 1

इमोशन्स वो बता पाते हैं एक्सप्रेसिव में।

00:25:42 Speaker 3

वो बोली बात है तो थोड़ी दिक्कत है स्पीच में।

00:25:44 Speaker 1

वो ड्राइंग, ड्राइंग, उसके थ्रू ड्राइंग।

00:25:46 Speaker 3

भी नहीं आती।

00:25:47 Speaker 1

है।

00:25:47 Speaker 3

खाली इशारे से ही बता देता है। ये कुछ करके बोलता है मानो जैसे भूख लगी है तो हॉटपॉट ले आएगा। कभी इसका मतलब नहीं है, कुछ छीना होना चाहिए।

00:25:54 Speaker 1

उसकी अक्टिविटीज़।

00:25:56 Speaker 3

हाँ।

00:25:56 Speaker 5

जी।

00:25:57 Speaker 2

सर एक बार रिपीट।

00:25:58 Speaker 1

जैसे बच्चों को उसकी भावना पहचानने में आप उसको मदद कर रहे हैं देन आपको कोई कठिनाई का सामना करना पड़ता हो।

00:26:06 Speaker 2

कभीकभी होता है तो ज्यादातर तो ये होता है कि वो समझ में आ जाता है।

00:26:11 Speaker 1

जैसे आप बच्चे को मान लीजिये कि एंगर का एक भावना आ गई।

00:26:13 Speaker 2

है। हाँ, हाँ।

00:26:14 Speaker 1

गुस्सा हो रहा है देन आप समझा रहे हैं उस टाइम पे देन आपको कई पटनायक का सामना करना पड़ता होगा।

00:26:18 Speaker 2

तो मैं उसको समझाती हूँ, के नहीं ये।

00:26:20 Speaker 1

समझ जाते हैं वो एंजैक्टली।

00:26:21 Speaker 2

हाँ, ऐसा समझ जाते हैं। कभी कभी रेली ऐसा होता है की नहीं समझता है।

00:26:25 Speaker 1

अच्छा।

00:26:25 Speaker 2

चाहे मैं उसे प्यार से समझाऊँ चाहे गुस्से से समझाऊँ जी फिर भी समझ जाता है।

00:26:29 Speaker 1

जी आप जी समझ जाता है समझ जाते हैं मतलब अगर एंगर वगैरा आया कुछ भी आपा

00:26:33 Speaker 4

कुछ अगर।

00:26:34 Speaker 4

मैं बता दूँ कि अभी मुझे काम है, थोड़ी देर बाद लाके दे दूँगी, समझ जाएगा और कभी नहीं भी समझेगा, कभी तोड़फोड़ मचा देगा। बहुत ज्यादा शोर करने लगा, अभी चाहिए तो चाहिए जीजी और कभी मान भी जाता है।

00:26:45 Speaker 1

जी आप समझ जाते हैं जो भी चाहिए वो सब कुछ हो जाएगा। अच्छा ठीक है, उन्नीसवाँ प्रश्न है।

00:26:54 Speaker 1

नहीं सॉरी सच्चीमा प्रश्न है अपने बच्चों के भावनाओं को सवस्थ तरीके से या सही तरीके से व्यक्त करने में ठीक है। उसमें आप प्रोत्साहित करते हो कि बेटा जैसे दुखी हो तो बता पाओ यार, है ना? किसी भी तरह से एक्सप्रेस कर पाओ, हमारे पास से पहुँचा पाओ तो इसमें कई बार कठिनाई का सामना करना पड़ता हो। आपको कि मैं ऐसा टीज कर रहा हूँ खासकर भावनाओं पढ़ा रहा हूँ।

00:27:13 Speaker 1

की भाई, जब कभी आप दुखी हो जैसा बिहेव्यर आपका आ रहा है, सैड हो जा रहे हो तो मेरे को इग्जैक्टली आके तुम बता पाओ की भाई तुम दुखी हो, परेशान हो तो उसमें कई बार कठिनाई का सामना करना पड़ता।

00:27:23 Speaker 3

है हाँ, ये थोड़ा सा परेशानी है क्योंकि वो प्रॉपर नहीं बता पा रहा। कोई इश्यू।

00:27:27 Speaker 1

मतलब कोई इमोशन्स को एक्सप्रेस करने के लिए कुछ ना।

00:27:30 Speaker 3

कुछ है?

00:27:30 Speaker 1

कुछ ना?

00:27:31 Speaker 2

कुछ प्रॉपर इमोशन्स एक्सप्रेस कर लेता है।

00:27:33 Speaker 1

अच्छा।

00:27:34 Speaker 2

दुख है तो दुख खुशी है।

00:27:35 Speaker 1

ठीक है वो।

00:27:36 Speaker 4

ये भी बता देता है अच्छा जो होता है वो बता देता।

00:27:39 Speaker 1

है जी आपका ना।

00:27:40 Speaker 5

जी सुख दुख का तो बता ही देता है आप कोई आपकी दूसरी।

00:27:44 Speaker 1

कोई भावना?

00:27:45 Speaker 5

नहीं, ऐसा कुछ नहीं है। मतलब जो उसको नीड जीस, जो उसकी जरूरत की चीजें हैं नहीं, जो उसे चाहिए या कुछ भी हो रहा है ऐसे इस तरीके का?

00:27:53 Speaker 5

बाकी वो चीज़ बता देता है जैसे चोट लग गयी तो वो रियेक्ट करेगा, ना की दुख हो रहा है या कुछ।

00:28:00 Speaker 1

ऐसा

00:28:01 Speaker 3

लगा

00:28:01 Speaker 5

गयी। जैसे अगर फीवर वीवर हो गया तो वो वो ये चीज़ थोड़ा ना उसको पता हैं

00:28:05 Speaker 1

अच्छा

00:28:06 Speaker 5

वो नहीं बता पायेगा वो भी वो भी

00:28:07 Speaker 1

तो भावना में

00:28:08 Speaker 5

ही आणी भावना मतलब ये इन सभी बच्चों में यही कंडीशन होती हैं

00:28:13 Speaker 5

कुछ चीजे तो ऐसी है जो वो बता सकते है। कुछ चीजे तो माँ और बाप को मतलब खुद ही समझ जाते है की भाई इसको दिक्कत है ये वो खुद नहीं बताते है। वो तो समझनी पड़ती है। हाँ हाँ

00:28:24 Speaker 3

जी हमारे बच्ची के साथ ये दिक्कत है वो जैसे किसी बच्चे ने उसको धक्का दे दिया, ये भी तो मार दिया

00:28:32 Speaker 3

अब वो हमें ये नहीं बता पाएगी कि मुझे इस बच्चे ने मारा है और कहाँ मारा

00:28:35 Speaker 5

है। बिल्कुल ये तो हमारे यहाँ बच्चे के साथ स्कूल में भी हुआ है, किसी ने इसे मारा मोरा है तो चोट वोट लग रही

00:28:42 Speaker 3

थी अब वो

00:28:42 Speaker 5

ने



00:28:42 Speaker 3

मारा है।

00:28:43 Speaker 5

तो ये चीज़ नहीं पता किसी ने भी हमारे

00:28:46 Speaker 3

साथ कर दिया है।

00:28:47 Speaker 4

फिर वो मारेगा और उनका ही मामले हैं कि वो बोल रहा था।

00:28:50 Speaker 2

जो बच्चा नहीं कर पाता।

00:28:52 Speaker 3

वो।

00:28:53 Speaker 2

उसमें सर ये भी नहीं वो रिकॉग्नाइज़ भी नहीं कर पाती।

00:28:55 Speaker 3

हाँ, वो मालूम सर, अब जैसे उसके पीठ में दर्द है तो

00:28:59 Speaker 5

बता ही नहीं।

00:29:00 Speaker 3

पाई ये रो गई, पता ही नहीं चलता।

00:29:01 Speaker 5

उसके पेट में दर्द है, ये दांत में दर्द है, क्या है? हमारे वाले में भी वो नहीं वो।

00:29:06 Speaker 3

रो होगी तो उससे भतेरा पूछेंगे।

00:29:08 Speaker 4

बेटा क्या इशारा करदे?

00:29:10 Speaker 4

लेकिन समझने में सब कुछ बता देता है, बस पढ़ाई नहीं करता।

00:29:13 Speaker 3

ये दिक्कत है।

00:29:14 Speaker 4

सब बताने में तो सब कुछ बता देगा कि ये हो रहा है वो हो रहा है, बस पढ़ाई नहीं करेगा। पढ़ने में दिल नहीं लगता है इनका जैसे कोई कॉपी दे दो कुछ भी दे दो ऐसे ऐसे दागेगा कुछ वर्ड नहीं दिखेगा उसको बस लंबी लंबी लाइन खींचेगा इधर से उधर पूरे गंदे।

00:29:27 Speaker 1

की अगला प्रश्न मेरा अट्टरहवा प्रश्न है जब आपका बच्चा हीन भावना क्योंकि हम सब पॉजिटिव में कभी होते हैं तो कभी साइड में भी जाते हैं। सभी लोग जाते हैं ह्यूमन में तो कभी हीन भावना हो या कोई चिंता भावना उसको आ रही हो तब वो उसको व्यक्त करने में अनुभव कर रहा हो। कुछ कठिनाई देन आप उसको कैसे बता पाते हैं? कठिनाई आपको भी आ रही होगी। समझाने के लिए की बेटा अगर कोई दुखी हो

00:29:46 Speaker 1

तो किस तरह से एक्सप्रेस करो या फिर कभी चिंता में हो तो किस तरह से आप अपने चीज कर सकते हो ताकि वो आप उस चिंता से बाहर आ सको।

00:29:54 Speaker 3

मेरा बच्चा अभी गया ही नहीं।

00:29:57 Speaker 1

है।

00:29:58 Speaker 3

काफी मतलब उसमें दिक्कत है। वो समझ ही नहीं पता है की वो उसको।

00:30:02 Speaker 3

फिर क्या प्रॉब्लम है, कहाँ दर्द है, कहाँ पेन है, इमोशन्स भी उसके कुछ ही हमें पता रहते हैं कि ऐसे खुशी वाला है या भूख वाला है या।

00:30:10 Speaker 1

अनलिमिटेड

00:30:11 Speaker 3

10 लेवल का है। मतलब थोड़ा इंटिमिड है, हाँ जी जी।

00:30:15 Speaker 2

मेरे को जो है प्रॉपर मतलब उसके एक्सप्रेसन होते हैं। वो एक्सप्रेस कर देता है कि अगर उसके साथ जैसा भी हो रहा है।

00:30:21 Speaker 2

बल्कि इसको ऐसे ही समझ रहा है तो उसको भी उसे फील हो जाता है। वो मुझे समझा भी रहता है।

00:30:25 Speaker 1

जी।

00:30:25 Speaker 2

हर तरह की फीलिंग, इसपे ठीक।

00:30:27 Speaker 1

है आप?

00:30:27 Speaker 2

बता देता हूँ सब।

00:30:28 Speaker 1

कुछ।

00:30:29 Speaker 2

वो बताता अच्छा।

00:30:30 Speaker 1

जी जी जी।

00:30:30 Speaker 5

जी क्वेश्चन क्या है?

00:30:32 Speaker 1

ये था कि वैसे आपका बच्चा जब कभी हीन भावनाओं का अनुभव कर रहा हो, अभी भी।

00:30:37 Speaker 5

मतलब दुखी, दुखी हो।

00:30:38 Speaker 1

सैड ही हो।

00:30:40 Speaker 1

एकदम सैड हो बैठा हो कभी फिर उसमें सैड भी है, चिंतन भी है, परेशान भी है, है ना? कई बार सैड में हम लोग दुखी होते हैं तभी तो उस टाइम पे वो आप उसको समझा रहे हो की किस तरीके से भाई क्या करना चाहिए? ताकि आप दुखी ना हो तो आपको कई सारी कठिनाई का सामना करना पड़ता होगा।

00:30:55 Speaker 5

दुखी तो अभी तो नहीं इतना पता ही नहीं की दुखी तो।

00:31:00 Speaker 1

बच्चे क्या होते हैं? बचपन से ही आता है जैसे मान लो की चॉकलेट ही मांग रहे है, आपने नहीं दिया तो उसका पहला बेहेवियर यही होगा की वो दुखी हो जाएगा।

00:31:06 Speaker 4

हाँ।

00:31:07 Speaker 1

तो उस टाइम पे फिर आप किस तरह से बताओगे? किस तरह से आप ने उसको बोला की भाई नहीं, दुखी मत हो, कोई बात नहीं दूसरी चीज़।

00:31:12 Speaker 4

बता दो।

00:31:13 Speaker 4

थोड़ी देर बाद कोई आएँगे, फूल लेके आएँगे।

00:31:15 Speaker 5

वो तो दुखी नहीं होते, वो तो ज़िद कर रहे हैं, उन्हें तो चाहिए।

00:31:18 Speaker 1

अच्छा ज़िद वाली।

00:31:19 Speaker 5

इसा

00:31:19 Speaker 1

चीज़ में आ रही।

00:31:19 Speaker 5

है, दुखी नहीं होती तो उन्हें तो चाहिए जो कोई चीज़ नहीं चाहिए हमारे वाले दुखी नहीं होता। वो तो फिर मारने मारने भी लगे। अच्छा मुझे तो दिलवाओ।

00:31:28 Speaker 1

अच्छा, अच्छा, अच्छा सही ठीक है सो अपने बच्चों को।

00:31:32 Speaker 1

आपा

00:31:32 Speaker 5

समझदार बच्चे ही तो दुखी होगा।

00:31:34 Speaker 1

हाँ, नहीं, ऐसी बात नहीं समझदारी समझदारा

00:31:37 Speaker 5

जिसमें अच्छी समझ होगी। जी वो तो दुखी होगा ना, जिसे समझ ही नहीं है वो दुखी क्यों होगा?

00:31:42 Speaker 1

नहीं नहीं, नहीं।

00:31:43 Speaker 3

ये।

00:31:44 Speaker 1

जैसे भाई हीन भावना था। हीन भावना से बचने के लिए हमारे पास एक जैसे कुछ स्ट्रेटेजीज होती है जैसे की लंबी, लंबी, गहरी, गहरी सांसे लेना।

00:31:50 Speaker 1

या आपस में बात करना एक दूसरे से है ना ताकि एक्सप्रेसवे में हम उसको निकाल सके तो ऐसी कुछ चीजें स्ट्रेटेजी सीखने में कोई कठिनाई का सामना करना पड़ता हो।

00:31:58 Speaker 3

नहीं, मेरे बच्चों को नहीं समझा

00:32:00 Speaker 1

समझ समझ ही नहीं पाते जी।

00:32:01 Speaker 2

नहीं समझ लेता है मैं उसका मतलब ये है की अगर कोई ऐसी कोई फीलिंग आ रही है तो मैंने कहा चलो हम बाहर चलते हैं।

00:32:07 Speaker 1

अच्छा।

00:32:07 Speaker 2

चलो बालकनी में चलते है, चलो ये करेंगे, वो करेंगे समझ लेता है।

00:32:12 Speaker 4

चला जाता है।

00:32:13 Speaker 1

अच्छा समझ चले जाते है जी आप जो ये था, जैसे की बच्चा कभी प्रॉब्लम से फेस कर रहा है, है ना? हीन भावना हो या चिंता हो या कोई दुखी हो।

00:32:22 Speaker 1

जी तो इस टाइम पे कई सारी स्ट्रेटेजीज होती है जैसे लंबी लंबी, गहरी गहरी साँसे लेना और बातें करना या फिर अपनी बात को एक्सप्रेस करना। चित्र के तरह राइट तो इसमें कुछ कठिनाइयों का सामना करना पड़ता होगा आप लोगों को।

00:32:33 Speaker 5

सामना तो करना ही पड़ता है।

00:32:34 Speaker 1

अच्छा मतलब सिखाते वक्त आपको कोई प्रॉब्लम होती होगी? कैसे? प्रोब्लम्स रहती?

00:32:38 Speaker 5

है। कोई भी चीज़ सिखाते है तो वो जल्दी से सीखता नहीं। ना।

00:32:41 Speaker 1

अच्छा जी जी ठीक है, बीसवां प्रश्न है मेरा जब आपका बच्चा कभी निराश हो ठीक है तब उनकी भावनाओं को मान्यता देने में की चलो आप इस बात पर निराश हो तो निराश होना भी बनता है। बट उसको वो मान्यता देने में की। भाई ठीक है, थोड़ी देर के लिए निराश ही सही, आप इस बात को भी एक्सेप्ट कीजिए राइट।

00:32:58 Speaker 1

तो इसको मैं समझाने में कोई कठिनाई का सामना करना।

00:32:59 Speaker 3

पड़ता है फिर तो भी हमें पता है कि उसकी जो चीज है वह खुश हो जाएगा।

00:33:05 Speaker 1

जी।

00:33:06 Speaker 2

नहीं, मुझे ऐसा कोई और नहीं होता कि जब ये होता है कि उसको ऐसी कोई फीलिंग है तो मैं उसको थोड़ी देर के लिए अकेला छोड़ देती हूँ।

00:33:12 Speaker 1

अच्छा।

00:33:13 Speaker 2

जी तो लगता है नॉर्मल हो।

00:33:14 Speaker 1

जाए लेकिन अपने आप से ही नॉर्मल होते।

00:33:16 Speaker 2

हैं हाँ जी।

00:33:17 Speaker 1

जी।

00:33:17 Speaker 4

जी ऐसे ही थोड़ी देर के लिए छोड़ दो, वो खुद आ जाएगा।

00:33:20 Speaker 1

जी जी आपके में

00:33:21 Speaker 5

हाँ, मैंने बताया था ना अगर कभी गुस्सा है निराश हो गया तो रूम में चला जाता है।

00:33:25 Speaker 1

थोड़ी देर।

00:33:26 Speaker 5

छोड़ दिया तो खुद ही अपने आप नॉर्मल होगा जी।

00:33:29 Speaker 1

जी इक्कीसवां प्रश्न है मेरा अपने बच्चों को सकारात्मक आत्मछवि बनाये रखने में यानी पॉजिटिव अटिट्यूड बनाये रखने में।

00:33:36 Speaker 1

लाइफ के लिए पॉजिटिव एटीट्यूड बना के रखे इसमें कुछ कठिनाइयों का सामना करना पड़ता हो।

00:33:42 Speaker 3

अभी इसमें।

00:33:42 Speaker 1

आपने टीचिंग अभी कुछ?

00:33:45 Speaker 2

नहीं, मुझे तो कोई जरूरत नहीं है अच्छा अगर कुछ जिंदादिन लग रहा है।

00:33:48 Speaker 1

पूरा बहुत अच्छी बात है जी सब कुछ खुद से करते हैं, सब कुछ खुद से करते हैं। ऐसा नहीं है कि कभी दुखी हो परेशान हो।

00:33:55 Speaker 1

मतलब पॉजिटिव अटिट्यूड लेके अगर ऐसी कोई चीज असफल भी हो गई तो फिर उसको पता है की अच्छा दुबारा देंगे तो मैं।

00:34:00 Speaker 4

हाँ जी, वो समझ जाता है दुबारा मैं करा।

00:34:01 Speaker 2

लूँगा, अच्छा।



00:34:02 Speaker 1

अच्छा जी हाँ

00:34:03 Speaker 4

जी तो फिर करा

00:34:03 Speaker 5

भी लेता है ये

00:34:05 Speaker 1

जी, अपने बच्चों को उसकी क्षमता पहचानने में कोई कठिनाई का सामना करना पड़ रहा हो। आपको लगता है की जैसे आप बताया ना बेटा ये तुम कर लोगे।

00:34:14 Speaker 1

हमने कोई अक्टिविटी के लिए उसको काम किया और बोला बेटा कर लोगे, लेकिन कई बार ऐसे बच्चे भी होते है की हम नहीं कर पाएंगे, नहीं कर पाएंगे तो ऐसा कुछ समस्या का सामना करना।

00:34:22 Speaker 3

ट्राई ही तो करता है।

00:34:23 Speaker 1

ट्राई करते है।

00:34:23 Speaker 3

हाँ बच्चे हम ट्राई करते है जो भी कहा जाता है की बेटा ये करना है वो ट्राई करता है, भले ही ना हो उससे जी जी बट वो ट्राई करता है आप जैसे उसको कहते है की वाशिंग मशीन चला के आओ हाँ।

00:34:32 Speaker 3

और वो सोचेगा कहाँ वो ट्राई करता है? हम कई बार कहते है की ये करो हम उसको एंजैम भी लेना चाहते है की भाई पापा के शूज लेकर आओ और वो रेप खोल के देखे पापा के शूज को उनसे एक बार तो ऐडेंटिफै कर लेता है, सिर्फ पापा के लिए वो ले आएगा, लेकिन जो सिमिलर शूज है।

00:34:51 Speaker 3

जैसे कोई गेस्ट आया बहुत कन्फ्यूजन हो गया था आज तो।

00:34:54 Speaker 1

अच्छा

00:34:54 Speaker 3

ठीक इसको

00:34:55 Speaker 1

जी

00:34:55 Speaker 2

अब मुझे कोई ज्यादा इफेक्ट नहीं करना

00:34:57 Speaker 1

है जी अच्छा आपके में आपके में कोई परेशानी नहीं होती, वैसे आपके में

00:35:02 Speaker 5

नहीं ये चीजे तो कर लेता है अच्छा

00:35:04 Speaker 1

मतलब क्षमता जो

00:35:05 Speaker 2

अपनी चीजों को पहचाना

00:35:06 Speaker 4

लेगा

00:35:07 Speaker 1

जी अच्छा नहीं मतलब क्वेश्चन ये था कि आप उनकी क्षमता पहचानने में आपको

00:35:11 Speaker 1

सब टीचिंग कर रहे हो कि बेटा ये तू कर लेगा करके क्षमता पहचानने के लिए आपने बोला है कि बेटा कर लोगे तो समझ के कर पाते हैं हाँ जी

00:35:17 Speaker 4

समझ के बता दूँ तो कर लेगा

00:35:19 Speaker 5

घर के सारे काम कर लेते हैं, लेकिन जो पढ़ाई से है ना रिलेटिव वो चीज़ नहीं मतलब कोशिश करेंगे, वो भाई ने की कोशिश करेंगे, जितना होगा उतना ही जितना उनका आता है बस जी जी जी बाकी नहीं।

00:35:30 Speaker 5

ठीक है, बाकी घर के जो भी काम है।

00:35:32 Speaker 1

ठीक है, अब तेईसवां प्रश्न मेरा है आपके सामने अपने बच्चों को नकारात्मक नामों या शब्दों से बचाने में आपको कौन सी घटना का सामना करना पड़ता है? कई बार अड़ोस पड़ोस भी उनको अलग डिफरेंट नेम से बुलाना स्टार्ट करते हैं तो?

00:35:44 Speaker 3

फिर।

00:35:45 Speaker 1

ऐसे बच्चों को समझाना।

00:35:46 Speaker 3

पड़ोसी के बच्चे बोलते हैं एक पागल है, खीर जाग रही है, ये है मतलब उसको नहीं उसको पता ही नहीं इसका क्या मतलब है बच्चों?

00:35:54 Speaker 1

को बच्चा पता नहीं।

00:35:54 Speaker 3

है हाँ, बच्चों को पता नहीं है।

00:35:57 Speaker 2

कई बार ऐसा होता है कि मैंने फील करा है कि जैसे मैं एक बार जा रही थी।

00:36:00 Speaker 2

तो दो बच्चे बैठे थे, छोटे बच्चे से ज्यादा बड़े नहीं थे लेकिन क्या हुआ? की मतलब मैंने उनको थोड़ा बिहेव, उनका चेक करके वो रिहाया की मजाक उड़ा रहे।

00:36:07 Speaker 1

है। अच्छा।

00:36:08 Speaker 2

साथ में उनकी मदर थी मदर कुछ नहीं बोल रही है, देख तो मैंने डाइरेक्टली उन बच्चों को डांट दिया, मतलब ये देखली की मैंने उनको मतलब आपको नहीं बताई की किस तरह का बच्चा है। मैंने उनको समझाया आस पड़ोस में तो मेरे मतलब जो नेबर्स है।

00:36:20 Speaker 2

वो लोग सब समझते है बच्चों को आपने।

00:36:23 Speaker 1

समझाया की कोई ऐसा बोले तो फिर क्या करना?

00:36:25 Speaker 2

है नहीं अभी कोई चीज़ समझ नहीं पा रहा है अभी नहीं।

00:36:29 Speaker 4

समझ पा रहा है जैसे कोई कुछ बोल दे, ऐसे चलने नहीं आता तो गुस्सा हो जाएगा बार बार रिपीट करेगा। मम्मी उसने मुझे ऐसा कुछ बोला। अच्छा आपने।

00:36:35 Speaker 1

मेरे।

00:36:36 Speaker 4

को ऐसे बोला जी उसने मुझे ऐसे बोला जी जी?

00:36:39 Speaker 5

जी आपको।

00:36:40 Speaker 5

जी सेम कंडीशन है वो मतलब देख जैसे चीजों को देख कर वो बहुत जल्दी कैच कर लेता है।

00:36:45 Speaker 1

अच्छा।

00:36:45 Speaker 5

मान लीजिए अगर वो किसी से देखेगा, कोई बच्चे गलत हरकत कर रही है, गलत बोल रही है तो वो सीख जाता है बहुत जल्दी।

00:36:51 Speaker 1

नहीं, ऋषभ को नकारात्मक नामों से कोई पुकार रहा हो वो।

00:36:54 Speaker 2

दोनों को बच्चे से हाँ

00:36:58 Speaker 5

नहीं, नहीं

00:37:00 Speaker 5

ऐसा कुछ नहीं पता इन सबको

00:37:01 Speaker 1

बारे में जी चौबीसवां प्रश्न है अपने बच्चों को स्कूल या समाज में साथ मिलकर खेलना समावेश करना है ना? उसमें आपको कुछ कठिनाई का सामना करना पड़ रहा हो

00:37:12 Speaker 3

अभी तो इनिशियल लेवल पे है। थोड़ा थोड़ा सा प्रॉब्लम है, बट होफुली की भाई ये सेटल डाउन हो जाएगी।

00:37:19 Speaker 1

अच्छा

00:37:19 Speaker 3

पटा भी तो है मतलब वो?

00:37:22 Speaker 1

समाज में ज्यादातर आपको प्रॉब्लम हो रही है, क्योंकि स्कूल में तो टीचर्स यहाँ पे हैंडल कर लेते हैं। सब लोग साथ में बैठते

00:37:27 Speaker 3

है। पार्क में ले के जाता हूँ। अब पार्क में भी वो बच्चा फ्रूटी पी रहा है तो सोच छीन लेगी फ्रूटी।

00:37:32 Speaker 1

अच्छा, हाँ, नहीं

00:37:33 Speaker 3

उसको ये नहीं पता ये गलत है ये जी जी जी उसके माँ बाप समझते हैं कि पागल बच्चा है क्या? ये ऐसे छीन रहा है इतना बड़े बच्चे को छोटे बच्चे से छीन रहा।

00:37:40 Speaker 1

है।

00:37:40 Speaker 3

ना तो 10 साल की बच्ची है और दो 3 साल के बच्चे से छीन ले तो उनको लगता है बड़ा है। बिल्कुल हमें थोड़ा सा कभी कभी फील होता है कि उसको थोड़ा सा बच्चों को दूर रखो। ये किसी बच्चों को ऐसे खिंचेगी या बोलेंगे, उनको लगता है मारा

00:37:52 Speaker 3

जी जी जी तो हम चाहते हैं कि ये अपने ही परिवार में बच्चों के साथ खेले, उनको तो पता है कि वो इसका बिहेव क्या है? जी जी बिल्कुल बट लेकिन समाज जो हमारा है, वो एक्चुअली एक्सेप्ट ही नहीं कर पाता है जीजी।

00:38:03 Speaker 1

हाँ।

00:38:03 Speaker 3

हम भी पार्ट है।

00:38:04 Speaker 1

हाँ, बिल्कुल, मैं समझता हूँ।

00:38:05 Speaker 3

शायद अगर ये हमारा बच्चा ना हो तो हम भी।

00:38:07 Speaker 3

इतना नहीं दुसरो को समझता है समाज की मेंटालिटी है ये प्रॉब्लम है नहीं ये बिल्कुल।

00:38:13 Speaker 1

है इग्जैक्टली तभी मैं उसको मॉडल भी डाल रहा।

00:38:15 Speaker 3

हूँ।

00:38:15 Speaker 1

इसलिए डाल रहा हूँ क्योंकि अगर जितनी मॉडल्स आप सामने।

00:38:17 Speaker 3

आए तो बड़ी प्रॉब्लम क्या है? देन?

00:38:19 Speaker 1

वो समझता है की अच्छा ये ऐसा भी होता है देन इस तरह

00:38:21 Speaker 3

एक और बड़ी समस्या क्या है? हमारे यहाँ के जीतने भी हमारे पॉलिसी मेकर्स हैं?

00:38:26 Speaker 3

तो सारे के सारे नॉर्मल होते है

00:38:28 Speaker 1

हाँ, बिलकुल

00:38:29 Speaker 3

वो सबसे बड़ी दिक्कत ये है उनको पता ही नहीं हमारी क्या प्रोब्लम्स है अब जैसे मैंने अपना हैंडीकैप सर्टिफिकेट मैं खुद डिसेबल्ड हूँ मैं अपना सर्टिफिकेट बनाने गया था, इतना दौड़ाते है उनको ये शर्म नहीं आती है डॉक्टर्स को या स्टाफ को ये बंदा कैसा चल रहा होगा?

00:38:43 Speaker 3

अब्वल तो हॉस्पिटल आने में ही उसको नानी याद आ रही होगी। पहले बड़ेबड़े गवर्नमेंट हॉस्पिटल इतने बड़े होते हैं, मेन गेट से अंदर तक जाने में ही अच्छे आदमियों का पसीने निकल जाये। अब वहाँ पहुँचे तो ऐसे इर्रेस्पॉन्सिबल ढंग से बात करते हैं आप वहाँ जाओ, डेढ़ नम्बर में जाओ। थर्ड फ्लोर में ही भीड़ कियो।

00:39:01 Speaker 3

मतलब महीनों चक्कर लगवाते है आप, इसके बाद भी वाला आपको जवाब नहीं मिलता है। यही हाल गवर्नमेंट है। डिपार्टमेंट का इसका रीसन क्या है? जो मैंने एनालिसिस करा। माइट बी वो नॉर्मल होते है।

00:39:15 Speaker 1

वो।

00:39:15 Speaker 3

एजैक्टली हमारी फीलिंग्स पता ही नहीं होती है की भाई ये क्या फील कर रहे है बिलकुल?

00:39:18 Speaker 1

बिलकुल आप।

00:39:19 Speaker 3

सही है। ये सबसे बड़ा इश्यू है इवन हमारा जो डिसवर्ड जो मंत्रालय होता है जो सोशल वेयर हाँ बिलकुल वहाँ कोई भी ऐसा बंदा नहीं है जो डिफिकल्टीज़ हो जिसके पास।

00:39:30 Speaker 3

इसीलिए इनको सब को बुकिश नॉलेज होती है। जी, बिलकुल में ये लोग मैग्नेटिका

00:39:34 Speaker 1

होते हैं अक्चवली इनको बुकिश नॉलेज भी नहीं होती। इनको ये है की हमारे ऊपर ही ये लोग सोर्स पे करते हैं। रिसर्च किसी ने किया तब तो मिलेगा आप जैसे मैंने कहा उन्होंने मॉड्यूल बनाया, मैंने मॉडल देखा मैंने ये क्या है सर? इसमें कुछ इन्फॉर्मेशन कवर नहीं हो रही है। कुछ भी।

00:39:45 Speaker 3

होता वो।

00:39:46 Speaker 1

फिर अभी ऊपर ऊपर से तो उन्होंने तुरंत देखा उनका चार पेज का है।

00:39:49 Speaker 1

चार पेज का मॉड्यूल बना दिया। उन्होंने की चार पेज में पेरेंट्स को क्या इन्फॉर्मेशन दे रहे हैं की कैसे प्रॉब्लम का सलूशन करना है? तब जब उनको ये बताई जब दिखाया उनको सब चीज़ें देखीं जब उनको लगा नहीं। आप सही जगह सही दिशा में जा रहे हैं, वो खुश हो गए। वो बोले की आप कीजिये इसको अगर मतलब वाकई कुछ आपका असर कर गया तो वो मेरे पास लेके आएगा। हम लोग उसको अपना पुराना हटा के ये डालेंगे।

00:40:08 Speaker 1

तो एक मतलब वो गवर्नमेंट के नाम ही चला जाएगा। मेरा आइटम ही गवर्नमेंट के नाम से है। मेरा उसमें कुछ नहीं रहेगा। बट वो कम से कम पब्लिक तक पहुँच पायेगा और सही काम आ पायेगा। जो चीज़ बननी है, जो चीज़ कर रहे हो, कम से कम वो तो हो सकता है। ओके हाँ जी।

00:40:18 Speaker 3

एक चीज़ और दूसरा भी हमारे जो डॉक्टर्स वगैरह हैं वो हमारा बड़ा मिसयूज भी करते हैं। मैंने नोटिस करा है। इतनी महंगी फीस लेते हैं वो लोग।

00:40:27 Speaker 3

उसके बाद क्या होता है की जो थैरेपी सेंटर्स होते हैं, इतने कॉस्ट भी होते हैं? भाई ये लोग तो वैसे ही परेशान हैं हम लोग जो हैं। इतने महंगे, महंगे अच्छा फिर इतनी महंगी दवाइयाँ होती हैं, उनका जीरो इफेक्ट है इतनी महंगी महंगी में उसको अपना मैएंड का बना रहता है वो आइकॉन।



00:40:44 Speaker 3

महंगी महंगी दवाईयां होती है अच्छा उसके बिल्लिंग नहीं देतो ये डॉक्टर हमारे पास से देते है एक सिरप ₹1200 का ₹1300 का? जब के वो होसकता है, मात्र ₹100 का हो, जो की वो आपको मार्केट में मिलेगा ही नहीं इन्हीं डॉक्टर्स के पास मिलता है एक तरह से वो भी होता है हमारे साथ फिर बात बात है, हमारा एक तरह हो।

00:41:01 Speaker 3

इजी कराओ, ये कराओ, इतनी कराने के बाद भी सब नॉर्मल मतलब मैंने अपोलो से ले करके कलावती और अमृता हॉस्पिटल मतलब बड़े बड़े हॉस्पिटल में धक्के खाने के बाद भी इतने टेस्ट कराये है की मैं लाखों को उसमें आ गया था। मैंने उसमें रिसाल्ट जीरो।

00:41:18 Speaker 3

इतनी दौड़ धूप करने के बाद भी ये रिसाल्ट जीरो है।

00:41:20 Speaker 1

ये आपने बहुत अच्छी बात भाई मैं इसपे भी।

00:41:21 Speaker 3

लूट मार है।

00:41:23 Speaker 1

इसको भी पॉइंट को देखकर उसको डालूंगा कहाँ पे किस तरह से?

00:41:29 Speaker 5

इनिशियल कार्ड चाहिए मैं तब मैं आपके पास इसलिए।

00:41:34 Speaker 5

मुझे पता है हम चाहते हैं ना कि बना ले तो ये इतना बड़ा एक काम है। महाभारत है ये काम तो स्कूल का होना चाहिए भाई जब हम तुम्हें पता लग गया भाई पढ़ा रहे हैं, बच्चे भी ये तो आसान होना।

00:41:49 Speaker 3

चाहिए।

00:41:50 Speaker 2

डॉक्टर?

00:41:50 Speaker 5

स्केल तो बनवा के देने चाहिए।

00:41:55 Speaker 1

प्रॉपर स्कूल में भी कई बार इन्स्टिट्यूशन से बुलाते हैं।

00:41:58 Speaker 3

हाँ तो वही कई चीजें हैं। हाँ, बिल्कुल, बिल्कुल सरकारी हॉस्पिटल में डिसेबिलिटी एक अलग सेपरेट डिपार्टमेंट होना चाहिए कि भाई वहाँ पर सीधा बंदा जाए और एका

00:42:07 Speaker 3

तो अभी।

00:42:08 Speaker 1

इसमें अक्ववली क्या है ना नेशनल इन्स्टिट्यूशन जहाँ से मैं पढ़ा हूँ उनका एक बिजनेस सेंटर भी यहाँ पे है। नॉएडा में है वो लोग भी लगातार कैप लगाते हैं सभी लोग कैप ठीक है, वो सब भी कैप लगाते है। सभी लोग कैप लगाते हैं और

00:42:20 Speaker 2

प्रॉब्लम तो वो नहीं बनाते, कार्ड नहीं।

00:42:22 Speaker 1

कार्ड नहीं बनाएंगे, वो आपको असेसमेंट करके देंगे। सर हाँ, सर।

00:42:25 Speaker 1

उसका असेसमेंट करके दे। उनका जितना काम है उतना ही करके देंगे। उसमें वो कोई वो नहीं बैठते तो वही सब चीज है की मतलब पेरेंट्स को ये भी अच्छा इन्फॉर्मेशन आपको तो चलो आपने एक्सप्लोर कर लिया बट पेरेंट्स को पता चले की अच्छा ये भी है, है ना? फिर कुछ मेन्टल इलनेस का भी कोई प्रॉब्लम आ रही है तो उसके भी।

00:42:39 Speaker 1

वो नम्बर वगैरह है। साइट इनसे भी बात कर सकते हैं। इसमें भी कर सकते हैं। किनसे भी बात कर सकते हैं। एका

00:42:42 Speaker 3

अवेयरनेसा

00:42:44 Speaker 1

होनी।

00:42:44 Speaker 3

चाहिए हाँ ये एक्टिवेट करूंगा जी जी जी।

#### 00:42:47 Speaker 1

अपने बच्चों को स्कूल या समावेश ये था ना हाँ अपने बच्चों को स्कूल या समाज में समावेशन सुनिश्चित करने के लिए आपको दिन कठिनाई का सामना करना पड़ता है।

#### 00:42:55 Speaker 2

मुझे कम ही एपफोर्ट्स करने पड़ते हैं। ऐसा होता है की स्कूल में तो वो इसिली अडजैस्ट कर लेता है। उसको कोई प्रॉब्लम नहीं होती है और वही बात जैसे अगर हम किसी सोशल गेदरिंग में जा रहे हैं तो अगर उसमें बहुत ज्यादा अनजान है तो थोड़ा सा उसको मतलब प्रॉब्लम है। अनइजी होता है तो अगर फैमिली गेदरिंग है तो उसमें वो इसिली

#### 00:43:11 Speaker 1

अच्छा मतलब जो नोन फेस है उनके साथ सही से।

#### 00:43:13 Speaker 4

हाँ।

#### 00:43:14 Speaker 4

वो ऐसे ही है ना जैसे दूसरे लोगों को देख के रोने लगे ना मुझे घर जाना है। अगर घर के लोग और स्कूल में तो ऐसे ही एडजस्ट कर लेता है जितनी भी देर छोड़ दो, अच्छे से रहेगा।

#### 00:43:23 Speaker 1

जी आपके हम क्या कहना चाहेंगे?

#### 00:43:25 Speaker 5

सेम कंडीशन है कि अगर हम है उसके साथ में मतलब जिन्हें वो जानता है उनके साथ तो सही से।

#### 00:43:31 Speaker 5

कहीं हम उसे अनजान जाएंगे ना बाढ़ ले जाएंगे तो वहाँ पूरी तरीके से खुल नहीं पाता। बिल्कुल ऐसा हो जाता है कि ये बहुत नेक शरीफ है। मैं शांता

#### 00:43:39 Speaker 1

हो जाता हूँ एकदम से मतलब शांत हो जाता है एकदम शांता।

#### 00:43:42 Speaker 4

नहीं होगा। बोलेंगे मुझे तो लगा।

#### 00:43:43 Speaker 5

जाए।

00:43:43 Speaker 1

अच्छा घर जाने को बोलेंगे ठीक अगला प्रश्न है मेरा अपने बच्चों को खुद के लिए बोलना।

00:43:49 Speaker 1

कई बार उनके राइट्स होते हैं, अपने अधिकार होते हैं ना जैसे मेरी बॉटल है मेरा टिफिन है मेरा बैग है राइट अपने अधिकारों को जिसमें आपका बच्चा छीन के चला गया, उठा के चला गया तो अब नहीं बोलेंगे नहीं नहीं, मेरी बॉटल है, तुम क्यों ले जा रहे हो? जनरल बच्चे भी करते हैं, आपने देखा होगा।

00:44:01 Speaker 1

तो ऐसे चीजे सिखाने में कई बार आपको समस्याओं का सामना करना पड़ता है।

00:44:04 Speaker 3

मेरे बच्चों को भी पता नहीं है ये उसकी चीज है।

00:44:06 Speaker 1

अच्छा मतलब वो अभी।

00:44:10 Speaker 2

थोड़े से करने पड़ते हैं बट फिर मैं उसको मतलब करती हूँ एंकरेज करती हूँ नहीं तुम अपनी चीजों के लिए खुद बोलो।

00:44:15 Speaker 1

हाँ यो

00:44:16 Speaker 2

आपकी चीज है ये आप खुद वो लड़ेंगे इसके लिए मैंने आपके लिए बिल्कुल

00:44:19 Speaker 1

हमेशा

00:44:19 Speaker 1

तो।

00:44:20 Speaker 2

मैं उसको हमेशा यही सिखाती हूँ नहीं आप खुद बोलो आप खुद लड़ो इस चीज की जी जी।

00:44:24 Speaker 5

आप।

00:44:24 Speaker 4

नहीं अपनी चीज़ को खुद पहचानना है, किसी को छूने नहीं देगा अपनी सामान वो अलगा

00:44:28 Speaker 1

अलग लेकिन ऐसे बहुत सारे चीज़ होती

00:44:32 Speaker 2

है माना

00:44:32 Speaker 1

लीजिए कि मेट्रो में है। मेट्रो में उनके लिए सीट भी बनी है। प्रॉपरा

00:44:35 Speaker 2

नहीं ये सब इतनी

00:44:36 Speaker 1

समझ नहीं आता है।

00:44:39 Speaker 2

इस चीज़ के लिए कुछ आवाज उठाना उसके लिए हम उसमें उसको अरेंज करते।

00:44:42 Speaker 5

हैं। जी जी नहीं, अपनी चीज़ों का नहीं पता।

00:44:45 Speaker 1

अच्छा अपनी चीज़ों का।

00:44:46 Speaker 5

भी बहुत मतलब कम है, कभी कभार तो कह देता है जैसे घर में बाकी यहाँ जैसे आएगा वो बैग या अपना वो लेके।

00:44:53 Speaker 5

उसे नहीं पता है ये मेरी है क्या? अच्छा मतलब कोई ले भी लेगा।

00:44:56 Speaker 1

तो फिर?

00:44:56 Speaker 5

हाँ, उसको नहीं।

00:44:57 Speaker 3

उसके सामने निकल लेगा हाँ।

00:44:59 Speaker 5

वो और।

00:45:00 Speaker 1

ना ही वो एक्सप्रेस करेंगे।

00:45:01 Speaker 3

ना ना के लिया है नहीं बेसिका।

00:45:03 Speaker 2

तो बोलेंगे ये मेरा है उससे छीना।

00:45:05 Speaker 5

भी लेगा है ना? अगर किसी ने उसको मार मुझे तो वो ये भी नहीं बता पाएगा कि किसने मारा।

00:45:10 Speaker 3

है किसी ने मारा भाई ये दिक्कत है भी हमारे बच्चे की।

00:45:13 Speaker 3

अच्छा सर वो कई बार तो ऐसा होता है जैसे वो मेरे साथ स्कूटी में जा रही है घूमने वो कहीं उधर ही उसने चप्पल ही फेंक दी अपनी अच्छा सर कितनी चप्पल फेंक दी उसने अच्छा कितने जूते उसके यानी गायब हो गए?

00:45:24 Speaker 1

अच्छा।

00:45:24 Speaker 3

अच्छा हाँ उनको उतार भी देती है।

00:45:27 Speaker 1

हाँ गर्म के हाँ।

00:45:29 Speaker 3

वो उधार देती है, मान लो उसके पैरों में बिजली की दाल में फेंक दी, चलती गाड़ी पे सब बताएंगे भी नहीं की मैंने फेंक दिया उसको पता ही नहीं है।

#### 00:45:35 Speaker 1

चल अगले प्रश्न में जाते हैं छब्बीसवां प्रश्न है और इसके बाद चार प्रश्न और रह गए हमारे कोई इश्यू नहीं है। एक सुरक्षित और सहयोगी घर का वातावरण बनाने में कई बार आप भी फ्रस्ट्रेशन लेवल बढ़ता रहता है या फिर आपका कोई?

#### 00:45:48 Speaker 1

है ना भाई मतलब दूर के भाई सब उनको बुला लेंगे सब प्रॉब्लम आती है की साथ में मिलके निकलते हैं या फिर लड़ाई हो गई गुस्सा हो गए तो ऐसा घर का एनवायरनमेंट पॉजिटिव बनाये रखने में आपको तीन कठिनाइयों का सामना करना पड़ता।

#### 00:46:00 Speaker 3

है दिक्कत है देखो हम लोग जो फैमिली के जैसे की माँ और मैं तो बना लेते हैं बट जो सिबलिंग्स है वो।

#### 00:46:05 Speaker 3

उनका फ्रस्ट्रेशन लेवल बढ़ जाता है, क्योंकि ये क्या करती है, उनकी चीज़ें बिगाड़ती रहती है। मान लो उसके बैग से सामान निकाल के फेंक देगी या उसकी खाने पीने की चीज़ वो खाने बैठा है वो खा लेगी या कुछ ऐसा है? मतलब ये है की नजर बस्ती ये अपना काम कर देगी, मान लो जैसे वो हाथ धोने गया। अपना खाना रख के गया है तो ये स्टार्ट हो जाएगी।

#### 00:46:25 Speaker 3

वो इर्रिटेट हो जाता है।

#### 00:46:26 Speaker 1

हाँ, अपना वही है।

#### 00:46:28 Speaker 3

अपना खाना खिलाओ क्योंकि ये नहीं पता है कि मुझे हाथ धोकर खाना खाना है, ये हाथ धोकर बैठना है, ये रीज़न है इस पिकचर में जी जी।

#### 00:46:35 Speaker 2

सर, मैं पहले ज्वाइंट फैमिली में रह रही थी तो मुझे मतलब प्रॉब्लम फेस करनी पड़ती थी। मतलब ये है बच्चों को तुम बड़ों को समझाना है, ज्वाइंट फैमिली के ज्यादा इश्यूज है, मैंने देखा।

#### 00:46:45 Speaker 2

बहुत ज्यादा मैं वहाँ पे परेशान थी, इसीलिए अब मैं मतलब सिंगल अपना अलग रहती हूँ बच्चे और मैं तो ये है की मैं और मेरे बच्चे है तो सिर्फ दो बेटियां है और बेटा है तो मुझे अब कोई इतनी प्रोब्लम्स नहीं होती है की बेटियों को मैं अपनी समझा लेती हूँ, उनको समझती भी है। इस चीज़ को की भाई अभी नॉर्मल नहीं है तो?

00:47:03 Speaker 2

अब मुझे प्रॉब्लम नहीं होती, पहले मुझे होती थी।

00:47:05 Speaker 1

जी जी जी

00:47:06 Speaker 2

नहीं।

00:47:07 Speaker 4

मुझे नहीं होती, मैं तो अकेली रहती हूँ, मैं मेरे दो बच्चे

00:47:10 Speaker 1

अच्छा जैसे कभी आप लोग कभी।

00:47:11 Speaker 3

जॉइंट फैमिली।

00:47:12 Speaker 4

मैं नहीं, जॉइंट फैमिली में नहीं।

00:47:13 Speaker 2

जॉइंट में तो बहुत प्रॉब्लम होती है, जॉइंट में प्रॉब्लम होती है। जॉइंट।

00:47:15 Speaker 4

मैं भी रही हूँ तो अम्मी के साथ ही रही हूँ तो कोई दिक्कत नहीं।

00:47:18 Speaker 1

है। जी जी, आपके में जरूरी है चार चार चीज़ के लिए।

00:47:21 Speaker 5

मतलब जैसे उसके भाई बहना।



00:47:23 Speaker 5

करते हैं वो हाँ हाँ जी जी।

00:47:25 Speaker 1

उसमें या फिर।

00:47:25 Speaker 5

उस सभी के साथ होता है।

00:47:27 Speaker 1

मतलब उसमें पॉजिटिव एनवायरनमेंट बनाये रखने में की। बच्चों को जा बाकी बच्चों को जा के गुस्सा हो रहे हैं। नहीं, गुस्सा नहीं होना है तो फिर उस टाइम पे आपके इस तरीके से।

00:47:34 Speaker 5

नहीं हमारे।

00:47:36 Speaker 1

भाई भतीज दो हैं, वो उसके साथ में कोआपरेट करते हैं।

00:47:40 Speaker 5

अगर वो कुछ गलत हरकत भी करता है, वो ऐसा चीज़ तो।

00:47:43 Speaker 5

उसको वो प्यार से हैंडल करते हैं। मतलब ऐसे नहीं करते हैं।

00:47:45 Speaker 1

जी जी ठीक है देन उसके बाद सत्ताईसवां प्रश्न है मेरा अपने बच्चों की जरूरतें शिक्षकों को समझाने में आपको कई बार समस्या का सामना करना पड़ता है।

00:47:56 Speaker 3

शिक्षक को तो हम लोग बता ही देते हैं क्या?

00:48:00 Speaker 1

क्या है? तो फिर वो।

00:48:01 Speaker 3

से इश्यू रहते हैं।

00:48:03 Speaker 1

ठीक है ना? एक्सप्रेस कर पाते हैं। टीचर्स को भी ये चीजें ठीक है।

00:48:06 Speaker 3

उसको बताया।

00:48:07 Speaker 2

था। जी वो टीचर्स तो उसके ज्यादा समस्या थी।

00:48:11 Speaker 1

मतलब हम समझा पाते हैं मतलब सही तरीके से ये सब ठीक है।

00:48:15 Speaker 1

अच्छा आप भी बता दो।

00:48:18 Speaker 5

टीचर्स हाँ।

00:48:19 Speaker 1

टीचर्स के लिए अगर वैसे टीचर्स को बताते हैं ना की बच्चों की ये जरूरतें हैं इसके हिसाब से आप पढ़ाइये हैं ना देन? उसमें कोई कठिनाई का सामना करना पड़ रहा हो।

00:48:28 Speaker 5

नहीं ऐसा तो कुछ नहीं है, लेकिन हमें तो ये फील हुआ है। देखो कई साल से हम बच्चे को यहाँ ला रहे हैं।

00:48:34 Speaker 5

रिजल्ट हमें यहाँ कुछ नहीं जीरो है अभी मेरे हिसाब से तो अब हम कहने लगे झूठ तो ये भी हो सकती।

00:48:40 Speaker 2

है।

00:48:40 Speaker 5

भाई कुछ तो मतलब कई साल में तुम ये मैं कहूँगा आप टीचर हो अगर आप किसी मतलब एक एनिमल्स कुछ कुछ को भी।

00:48:48 Speaker 5

कुछ ऐक्टिविटी सिखाओगे तो कुछ तो सीखेगा वो?

00:48:50 Speaker 1

हमें

00:48:50 Speaker 5

कोई एजाम्पल दो भाई तुमने इसको कई साल रखा है तुमने क्या सीखा है कोई एक चीज़ हमें बता दो, रिज़ल्ट जीरो है जी बस ये है हम घर पेन लगा के छोड़ देते हैं।

00:49:00 Speaker 5

बाकी।

00:49:01 Speaker 3

कुछ नहीं है हाँ, एक शैडो टी शर्ट चाहिए।

00:49:03 Speaker 5

ये जो हकीकत है मैं यहाँ चाबलोशी तो महिला कानहीं है मेरे हिसाब से बाता

00:49:08 Speaker 3

मुझे भी बहुत मुश्किल लग रहा है मेरे को।

00:49:10 Speaker 5

मुझे भी ये लग रहा है ना क्योंकि हकदार है बिज़ार कितने साल में बताया मैं अब कई साल हो गए, बच्चे को बुला लिया, मतलब दोतीन साल तो हो ही गए।

00:49:19 Speaker 5

नहीं।

00:49:20 Speaker 1

सर आपने अभी उनका लेकिन कुछ।

00:49:22 Speaker 5

तो रिसाल्ट होना चाहिए ना स्कूल का जी जी जी भाई एक तो हम कहने लगे भाई ये इतने साल से आ रहा कुछ हमें एक ऐसी चीज़ बताओ जो आपने इसे सिखाई हो अगर ये बता दे हम हम मान जाएंगे पढ़ा रहे ये नहीं है तो बस एक हम ये है की भाई हमारे घर पर बच्चा रहेगा पूरा दिन।

00:49:36 Speaker 5

घर में इर्रिटेट होगा, हम लाते है, छोड़ जाते है, अभी ले आते है, बस वैसी उम्मीद इसके अलावा और कुछ नहीं है।

00:49:43 Speaker 1

नहीं, कभी जैसे कोई रिसाल्ट नहीं है। आपने भी कभी बताया जैसे टीचर्स को बता की शायद घर पे या ये रेकॉर्डिंग है? ये टीचिंग कर रहे है आप कुछ ऐसा आपने बताया हमको?

00:49:51 Speaker 5

क्या चीज़?

00:49:52 Speaker 1

जैसे होता है ना कई बार पेरेंट्स।

00:49:53 Speaker 5

बताते भी हैं। हम यहाँ तक के कहते हैं वो बटन चाहता है, बच्चा शर्ट चाहता है, हमारे बच्चों को आदत है, बटन चाहता है। हम उनसे कहते हैं ऐट लिस्ट भाई स्कूल भेज रहे हैं, कम से कम आप इसका इतना तो ध्यान रखो ये ना चबाएं अब ये तो कर लेता है ठीक है ये हमारी कोई भी आप है।

00:50:10 Speaker 5

रिस्पॉन्सिबिलिटी कुछ नहीं है, जीरो है। अगर कोई हमसे यहाँ का कोई अधिकारी पूछे तो हम साहब बताएंगे, हम क्यों करे हमारे लिए कोई रिसाल्ट नहीं है भाई जीरो है हमारा रिसाल्ट तो हम तो बस इसीलिए है कि बच्चों के लिए खुला है यहाँ टाइम पास करता है, छोड़ देते हैं कुछ सीख गया बच्चों में मिलके कोई हरकतों की अक्टिविटी वो अलग बात है बल्कि टीचर जीरो।

00:50:30 Speaker 5

कुछ नहीं है जी।

00:50:32 Speaker 3

यहाँ पर टीचर कुछ ज्यादा होने चाहिए देखो।

00:50:35 Speaker 5

अगर आप किसी जैसे आपको नई चीज़ की लगन है, आप मेहनत कर रहे हो जी जी तो कुछ न कुछ रिजल्ट आएगा न बिल्कुल अगर दिल में होगा अब मैं वो मैं यहाँ पे पढ़ाने लगा मेरे मुँह में तो मोबाइल चला रहा आज टाइम हो गया।

00:50:51 Speaker 5

खाली खाने का यहाँ किसी का कोई इंटेंशन नहीं है। यहाँ टाइम की पूर्ति है बस और कुछ नहीं है यहाँ जीरो है।

00:50:57 Speaker 1

समझ गया मैं समझ गया जो टीचर वाले जो पॉइंट्स है वो एग्जैक्टली आपने बताया अच्छे से क्लैरिटी की अगला है मेरा।

00:51:03 Speaker 5

तो सीखो जी।

00:51:04 Speaker 1

अपने बच्चों को घर के छोटे कार्य में शामिल करने में कोई घटना का सामना करना पड़ता हो?

00:51:09 Speaker 2

सही बात।

00:51:10 Speaker 1

है कार्य।

00:51:11 Speaker 2

में शामिल।

00:51:12 Speaker 3

कर लेते हैं बट लेकिन वो भी हमारे डिटेच हो जाता है, डिटेच नहीं होता है, जी जी वही दिक्कत है।

00:51:20 Speaker 5

जी जी।

00:51:21 Speaker 1

ये अपने बच्चों को कोई छोटे कार्यों में शामिल करने में कोई कठिनाई का सामना करना पड़ता हो।

00:51:26 Speaker 2

नहीं, सर तो नहीं होता है।

00:51:29 Speaker 5

अच्छा।

00:51:29 Speaker 2

छोटे काम तो कर लेते।

00:51:30 Speaker 1

है छोटे काम में कुछ शामिल करने में बच्चों को परेशानी होती हो।

00:51:33 Speaker 5

नहीं काम में तो जो कुछ भी काम बता रहे तो कर लेता है।

00:51:37 Speaker 1

अच्छा ठीक है, अपने बच्चे को परिवार में संगठित से जोड़कर रखने में कुछ कठिनाई का सामना करना पड़ता हो।

00:51:45 Speaker 3

इन बच्चों के साथ थोड़ी दिक्कत तो रहती ही है।

00:51:48 Speaker 3

युनाइटी नहीं हो पाते। बड़ी मुश्किल से होते हैं क्योंकि इनका मूड जो फ्लक्चूएट रहता है मूड की वजह?

00:51:52 Speaker 1

से जनरला

00:51:53 Speaker 3

इंजैक्टली इनका मूड गुड भी उसको रहता ही नहीं है। ये चीज़ कभी ना होती।

00:51:56 Speaker 5

है ये वाली?

00:51:57 Speaker 1

बात ये तो फिर आपका भी कोई।

00:51:59 Speaker 2

सेमा

00:51:59 Speaker 1

है उसका।

00:52:00 Speaker 2

दिन से सोचा

00:52:01 Speaker 1

निकालते हैं आपका विषय।

00:52:02 Speaker 5

सब सब यही होता है। इसमें अगर ये समझ जाए तो फिर।

00:52:05 Speaker 3

हमें आने की जरूरत ही क्या है?

00:52:09 Speaker 1

मेरा अगला प्रश्न है, अपने बच्चों के लिए जो चिकित्सा वगैरह, जो थेरेपी सेशनस वगैरह हम लोग कराते हैं या विकासात्मक के जॉब सेशनस वगैरह करवाते हैं, उनमें आपको किन बाधाओं का सामना करना पड़ता है?

00:52:21 Speaker 3

एक तो बहुत ज्यादा कॉस्टली है अगर हम बाहर सेट करा रहे हैं और यहाँ तो मैंने अभी तक देखी नहीं है, फिजियो है यहाँ पर अभी।

00:52:27 Speaker 3

होती है नहीं, फिजियोथैरेपिस्ट ही नहीं है। देखते हैं फिर ऐसे बच्चों की जब देखो बच्चा चल नहीं पाता है, फिर नशे में कार हो जाएगी यहाँ पर कितने बच्चे हैं? कम से कम चार या पांच फिजियोथैरेपिस्ट होने चाहिए ताकि वह रेगुलर जैसे की जैसे की मैं इंडीविजुअल जाकर कराता था।

00:52:47 Speaker 3

सेंटर पे ऐसे बच्चों को सपोर्ट करने के लिए वो बेसिकली इन्हीं के लिए डिजाइन थी। ऊपर से उसको ऐसा बनाया गया था। मॉडिफाई करके बच्चे गिरे बिना उसको चलता भी रहे ऐट लिस्ट कम से कम वो कुछ तो चलेगा ना जी?

00:53:01 Speaker 1

जी जी।

00:53:02 Speaker 3

बिल्कुल।

00:53:03 Speaker 3

उसको ये भी रहेगा मैं चल रहा हूँ उसकी मूवमेंट भी जो उसकी वगैरह वो भी बहुत जरूरी है। और जो ये जिम वाली बॉल होती थी उसकी थेरेपी कराते थे ये लोग, इसकी पूरी बॉडी हाँ कुछ मुझे ऐसा लगा नहीं है अभी तक बट ये है की ये थोड़ी सी।

00:53:21 Speaker 3

जो मुझे लगा है थोड़ा सा बेनिफिट ये लगा है कि मेरा बच्चा जो है, जैसे पहले घर पे रहता था, बाहर नहीं जाता था। अब वो यहाँ आकर भी बच्चों को थोड़ा सा घुलमिल जाता है। थोड़ा सा ये है कि भाई वो पहले मेरे साथ ही रहता था, वो तो छोड़ता नहीं था, 5 मिनट के लिए भी अब मैं काफी टाइम से आपके साथ बैठा हूँ।

00:53:38 Speaker 1

हाँ, बिलकुल।

00:53:38 Speaker 3

उसको पता नहीं मेरे पापा कहाँ है।

00:53:40 Speaker 3

तो एक तरह से अटैच ये तो थोड़ा बेनिफिट है ठीक है बट इन दी फिजिकल वे अगर हम देख रहे हैं की भाई इसकी बॉडी को भी भाई ऐसे बच्चे चाहिए चाहिए।

00:53:56 Speaker 3

और हम डेली अफोर्ड ही नहीं कर सकते, क्योंकि भैया ₹1000 का ये ₹500 का पर डे का सेशन, वो भी आपके घर के पास नहीं है सर आप कर भी लो, जैसे जैसे घर के पास हो तो उसके लिए आपको जाना पड़ेगा। इनके स्पेशल सेंटर हैं आने जाने नहीं है, आपका इतना हो जायेगा और फिर टाइम भी नहीं है। आपके पास इतना।

00:54:13 Speaker 3

या दुकान करोगे या कुछ काम करोगे? अब मैं यहाँ से जाने के बाद अब ड्यूटी पर जाऊंगा, फिर वो रात को होगा। फिर मैं सुबह उठ के मेयर के तरफ से ट्रिपल ड्यूटी चल रही है। मेरे को तो ये हमारे लिए।

00:54:28 Speaker 1

ये था कि बच्चों को चिकित्सा या विकास वाले जो कार्य जैसे सहायता जैसे थेरेपीस वगैरह कराने में कोई समस्या का सामना करना पड़ता।

00:54:34 Speaker 2

है हाँ, काफी सारी प्रॉब्लम मतलब प्रॉब्लम है। इसमें सबसे बड़ी प्रॉब्लम तो यही होती है कि हम उसको बजट में मेंटेन नहीं कर पा रहे, क्योंकि उनकी फीचर्स स्पीचेस बहुत ज्यादा होती है और दूसरा ये होता है कि सेंटर्स जो हैं इतनी दूरदूर होते हैं तो वहाँ आनाजाना।

00:54:47 Speaker 2

टाइम की भी परेशानी है। और वैसे भी ज़ाहिर सी बात है, परेशानी है कि वो बहुत ज्यादा कोस्टिंग में पड़ जाता है तो इसलिए बहुत प्रॉब्लम है जी।

00:54:54 Speaker 4

फैमिली में फिजियोथेरेपी तो मैं लेके जाती थी, पहले से अब टाइम की वजह से नहीं ले जा पाती हूँ। पहले ये जामिया में ही डेढ़ साल तक मैंने कराया था।

00:55:03 Speaker 4



एडमिशन का स्कूल हाँ जी वहाँ होता है।

00:55:06 Speaker 5

नहीं, हम नहीं कराते।

00:55:07 Speaker 1

फिजियो जाते वक्त कराने में ऐसी कोई समस्याओं का सामना करना पड़ता हो।

00:55:10 Speaker 2

कि गए हैं।

00:55:11 Speaker 5

जब हम कराते ही नहीं।

00:55:12 Speaker 3

है तो वो नसीब तो नहीं, वैसे भी वोलन्टिर्स आ जायेंगे आपके लिए तो।

00:55:19 Speaker 2

वही भी तो सारी बात है कि जामिया की जो गई है।

00:55:23 Speaker 2

पीपीटी के स्टूडेंट्स हैं और उनको और क्या उनको बुलाते हैं? एंट्रेस आ।

00:55:26 Speaker 3

जाएंगे। बिल्कुल अच्छा।

00:55:27 Speaker 2

समझ।

00:55:29 Speaker 3

ही नहीं।

00:55:30 Speaker 1

इन लोगों की हमने ट्रेनिंग की। इसी बहाने ट्रेनिंग की एस ए स्टूडेंट्स को ही।

00:55:33 Speaker 2

बुलाते हैं ट्रेनिंग वाली जी।

00:55:35 Speaker 5

फाइनांस ऐसी चीजें होती है ना जो माँ बाप को पता नहीं होती।

00:55:38 Speaker 1

वही चीजें मैं आपा

00:55:40 Speaker 5

तो कर चूके हैं।

00:55:42 Speaker 5

आपको ना बच्चे की बॉडी भी पता होगी कि हमारे पास कैसे भी है साधन कि इसको अगर थोड़ा सा बिगड़ भी जाए तो बिल्कुल भी फादर ये है उसको मना नहीं करेगा। चाहे पैसे भी लो बिल्कुल बिल्कुल बिल्कुल, लेकिन उनको सुविधा मिलनी ही चाहिए। आप तो सही कह रहे हैं ये हमारे नियरबै है कोई बात?

00:56:00 Speaker 3

नहीं वो चार्ज कर लो।

00:56:01 Speaker 3

इसी लिए यही होता।

00:56:02 Speaker 5

है पेरेंट्स तका

00:56:03 Speaker 1

इन्फॉर्मेशन पहुंचना ये बहुत जरूरी होता है जैसे फिजियोथेरेपिस्ट हो या हो स्पीच थेरेपिस्ट हो। वो जैसे रोज रोज सेशन देते रहते हैं एंड देन उसके साथ साथ पेरेंट्स को भी समझाते हैं, वो बिठाकर सामने बिठाते हैं। अगर आप कभी सेशन में गए होंगे।

00:56:15 Speaker 1

देखा होगा सामने बिठाते फिजियोथेरेपिस्ट तो आपको बोलने का आपको हाथ नहीं लगाने का बट आपका स्पीच थेरेपिस्ट वगैरह सामने बिठाएगा ये चीज मैं कर रहा हूँ एग्जैक्टली तुम देखो क्योंकि घर पे तुम्हे भी जाके सेम प्रैक्टिस करानी होगी एग्जैक्टली है ना तो ये चीज बहुत जरूरी होती है पेरेंट्स को भी इन्फॉर्मेशन लेना, पेरेंट्स को भी साथ लेके चलना ये ऐसा नहीं की टीचर का काम है या फिर पेरेंट का काम है।

00:56:32 Speaker 1

इसी एक को जिम्मेदारी साथ मिलकर काम करना पड़ेगा तब जाके बच्चे में इम्प्रूवमेंट आएगी। और इसीलिए जहाँ तक मैंने मौजूद सोचा की नहीं, पेरेंट्स का भी कम से कम उनको इन्फॉर्मेशन तो मिले। अच्छा जाना कहाँ है वो बिचारे इसलिए प्रॉब्लम हो रही है की भटक रहे है की जाना एग्जैक्टली का?

00:56:44 Speaker 2

होता है। सर मैंने सब से कहा था एक बार की आप जो है मतलब स्पीच कब आती है मैडम ऐसी बात नहीं है की नहीं।

00:56:52 Speaker 2

क्योंकि स्पीच के लिए आते ही नहीं है और ये होता है लेकिन ये है की एक बच्चे का नंबर कम से कम एक महीने में आता।

00:56:57 Speaker 1

है।

00:56:57 Speaker 2

और वो हमसे शेयर भी करते है, वीडियो शेयर करते है और ये भी बताते है की आज बच्ची की स्पीच से रखी हुई है। वीडियो शेयर करती है की ये चीज कराई गई है और आपकी चीज रिपीट करा दी। लेकिन मैंने ये कहा था की अगर कोई पर्सनल लेना चाहे सेशन।

00:57:09 Speaker 2

आप उसके लिए थोड़ा सा मतलब चार्ज कम कर दीजिए क्योंकि सर बहुत ज्यादा है। सर ने कहा था कि उसमें हम लोग कर सकते हैं क्योंकि जाने की तरफ से।

00:57:18 Speaker 5

ही।

00:57:21 Speaker 5

अगर ये स्कूल वाले इस चीज पे ध्यान देना है मतलब पढ़ाई के चलेंगे, कम पढ़ाई कर दे, लेकिन बच्चे को चीजें सीखा देना एक मतलब जो चीजें अच्छी होती है सही से।

00:57:31 Speaker 1

अक्टिविटी ये सब चीज में देंगे तो अपने आप ही, पेरेंट अपने आप ही तो थोड़ा सा और मुझे।

00:57:36 Speaker 2

लिमिट जाना पड़ता था।

00:57:37 Speaker 2

80% बच्चा तो ऐसे ही है पढ़ाई की।

00:57:40 Speaker 5

जरूरत।

00:57:41 Speaker 2

ही।

00:57:41 Speaker 5

नहीं है। ऐक्टिविटी सही हो जाए।

00:57:42 Speaker 3

ये ही एक कराएगा, बच्चा और स्पीच कराएगा तो एक तो प्रॉब्लम है।

00:57:47 Speaker 2

थी। यहाँ पर अब पता नहीं उनका भी कुछ दिन आए एक बच्चा था तो उसके लिए आते थे।

00:57:55 Speaker 3

हर बच्चे के लिए आना चाहिए हर बच्चे।

00:57:58 Speaker 2

हर।

00:57:58 Speaker 5

बच्चे स्कूल वाले थोड़ा सा मतलब सीरियस हो जाए नहीं के नहीं, हमें करना है दिल से तो बहुत कुछ कर सकते हैं अगर देखो अगर टाइम पास करने वाले फिर कुछ नहीं हो सकता।

00:58:07 Speaker 5

वो तो जो बच्चे खुद ही इम्प्रूव हो रहे हैं, इनके माइंड ऐक्टिविटी भी चल रही है। खुद हो जा रहे हैं।

00:58:11 Speaker 3

खुद हो जा रहे हैं वो नहीं।

00:58:12 Speaker 5

हो रहे है ना?

00:58:12 Speaker 3

वो नहीं है।

00:58:13 Speaker 5

वो नहीं है इस चीज़ की तो वो ऐसा ही है।

00:58:16 Speaker 3

तो वो बहुत खुश करना बहुत जरूरी है। वही वरना देखो लाइट तो अपने आप भी चल रही।

00:58:21 Speaker 5

है। टीम आई थी बाहर से तो मैं तो था नहीं, हाँ भाई आये होंगे।

00:58:25 Speaker 5

हमारे हमारे भाई को इतना भी वो नहीं है। पता नहीं है तो हर कोई मतलब अच्छी तारीफें कर रहा है जो टीचर जी मैं टीचर की हम बताते हुए टीचर क्या है? रिज़ल्ट क्या है? भाई, टीचरों का हमारे लिए तो कोई रिज़ल्ट नहीं।

00:58:37 Speaker 3

है ग्रोथ तो बहुत बड़ी बात।

00:58:39 Speaker 5

होती है ये थोड़ी है की अच्छी अच्छी चीज़ें बताकर दी जाओ।

00:58:43 Speaker 5

बढ़िया है जी हमारे।

00:58:45 Speaker 3

हाथ में भी कुछ नहीं है। अगर उनको आप बुराई बताओगे तो?

00:58:47 Speaker 5

बुराई की बात नहीं है एक चीज़ मैंने एक छोटी सी चीज़ बताई है आपको।

00:58:51 Speaker 3

हाँ।

00:58:51 Speaker 2

सर, देखिए, वो इसलिए था कि वो जो फैसिलिटीज यहाँ प्रोवाइड करा रहे हैं ना वो तो कंपनी का काम यहाँ फैसिलिटीज प्रोवाइड कराना था।

00:58:59 Speaker 2

तो उनके सामने थोड़ा बहुत हमने बोल दिया वो एका

00:59:02 Speaker 3

वो अलग हो जाता है क्योंकि बच्चों को इक्विपमेंट्स मिल जाएंगे। मानलो।

00:59:06 Speaker 5

वो तो सही है। अगर कोई सोच को लेकर कर रहा है तो हम सोचता है कि भाई इनके लिए हमें कुछ चीजें प्रोवाइड करा सकते हैं। यहाँ इनके सामने तुम अच्छे से बात वो सही है लेकिन अगर कोई मान ले अगर कोई टीम आ जाए, अभी कोई है तो ट्रस्ट कहीं।

00:59:18 Speaker 5

ये थोड़ा न चला रहे हैं। इस सैलरी तो ले रहे होंगे, ये या फ्री सेवा है ये ट्रस्ट कोई तो होगा ही नहीं।

00:59:24 Speaker 1

मेरे खयाल से जहाँ तक

00:59:25 Speaker 2

वेलफेयर कुछ एंजैक्टली पता।

00:59:26 Speaker 1

नहीं मेरे को।

00:59:27 Speaker 5

चैरिटी होती है न पैसा तो आता ही होगा, कहीं से कोई तो इसका मालिक होगा ही नहीं।

00:59:31 Speaker 2

देखिये ये तो एनजी ओह टाइप का एन।

00:59:34 Speaker 5

जी ओह है ट्रस्ट का पैसा आता है।

00:59:37 Speaker 5

उसी में से कोई फ्री में मैं तो काम नहीं करूँगा, कोई भी नहीं करेगा।

00:59:41 Speaker 3

सही बात है।

00:59:43 Speaker 5

जब हिंदी चीज़ का आपको पैसा मिल रहा है तो ईमानदारी से अपना मतलब थोड़ा सा काम करो। कुछ ऐसे टीचर हैं जो नहीं कर रहे हैं उन्हें हटा दो। भाई भाई हमने तो तुम्हें रखा है भाई बच्चों को थोड़ा सा लगना चाहिए।

00:59:56 Speaker 5

वहाँ भाई पढ़ाई होगी भाई हमने सही जगह है लेकिन हमें

---
